# Supplementary material for: Analysis of twelve genomes of the bacterium Kerstersia gyiorum from brown-throated sloths (Bradypus variegatus), the first from a non-human host
Source: PeerJ. 2024 Apr 4;12:e17206. doi: 10.7717/peerj.17206 (PMC10999152; doi:10.7717/peerj.17206)
Supplement: Supplemental Information 4 [file peerj-12-17206-s004.xlsx]

## Sheet: Table descriptions
Table S1	Functional annotation of each core and accessory genes using the COG database
Table S2	Number of genes in each COG category annotated for the core and accessory genes
Table S3	List of genes differentially present in isolates of sloths and humans including annotation
Table S4	Summary of COG annotation of genes listed in table S3
Table S5	List of regions predicted as phage sequences by virsorter2 and phispy tools in 16 K. gyiorum genomes
Table S6	Presence/absence matrix of plasmid replicons, phage sequences and defense systems predited in K. gyiorum genomes
Table S7	Antibiogram profile of 12 K. gyiorumisolates from brown-throated sloths

## Sheet: Table S1
Table S1 Functional annotation of each core and accessory genes using the COG database
Genome	OG-panaroo	Category	COG	Description
Core	aat	O	COG2360	Leu/Phe-tRNA-protein transferase
Core	accB	I	COG0511	Biotin carboxyl carrier protein
Core	accC	I	COG0439	Biotin carboxylase
Core	accD	I	COG0777	Acetyl-CoA carboxylase beta subunit
Core	aceA	C	COG2224	Isocitrate lyase
Core	aceE	C	COG2609	Pyruvate dehydrogenase complex, dehydrogenase (E1) component
Core	aceF	C	COG0508	Pyruvate/2-oxoglutarate dehydrogenase complex, dihydrolipoamide acyltransferase (E2) component
Core	aceK	T	COG4579	Isocitrate dehydrogenase kinase/phosphatase
Core	acnA	C	COG1048	Aconitase A
Core	acnB	C	COG1049	Aconitase B
Core	acpP	I	COG0236	Acyl carrier protein
Core	acpS	I	COG0736	Phosphopantetheinyl transferase (holo-ACP synthase)
Core	acs	I	COG0365	Acyl-coenzyme A synthetase/AMP-(fatty) acid ligase
Core	actP	C	COG4147	Na+(or H+)/acetate symporter ActP
Core	ada	L	COG2169	Methylphosphotriester-DNA--protein-cysteine methyltransferase (N-terminal fragment of Ada), contains Zn-binding and two AraC-type DNA-binding domains
Core	ada	L	COG0350	DNA repair enzyme Ada (O6-methylguanine-DNA--protein-cysteine methyltransferase)
Core	adhP	G	COG1064	D-arabinose 1-dehydrogenase, Zn-dependent alcohol dehydrogenase family
Core	ahcY	H	COG0499	S-adenosylhomocysteine hydrolase
Core	ahpC	V	COG0450	Alkyl hydroperoxide reductase subunit AhpC (peroxiredoxin)
Core	ahpF	V	COG3634	Alkyl hydroperoxide reductase subunit AhpF
Core	alaS	J	COG0013	Alanyl-tRNA synthetase
Core	alkB	L	COG3145	Alkylated DNA repair dioxygenase AlkB
Core	alr	M	COG0787	Alanine racemase
Core	amt	P	COG0004	Ammonia channel protein AmtB
Core	apaG	P	COG2967	Uncharacterized conserved protein ApaG affecting Mg2+/Co2+ transport
Core	apbC	D	COG0489	Fe-S cluster carrier ATPase, Mrp/ApbC/NBP35 family
Core	aqpZ	G	COG0580	Glycerol uptake facilitator or related aquaporin (Major Intrinsic protein Family)
Core	araD	EG	COG0129	Dihydroxyacid dehydratase/phosphogluconate dehydratase
Core	argA	E	COG1246	N-acetylglutamate synthase or related acetyltransferase, GNAT family
Core	argA	E	COG0548	N-acetylglutamate kinase
Core	argB	E	COG0548	N-acetylglutamate kinase
Core	argC	E	COG0002	N-acetyl-gamma-glutamylphosphate reductase
Core	argF	E	COG0078	Ornithine carbamoyltransferase
Core	argG	E	COG0137	Argininosuccinate synthase
Core	argH	E	COG0165	Argininosuccinate lyase
Core	argJ	E	COG1364	Glutamate N-acetyltransferase (ornithine transacetylase)
Core	argS	J	COG0018	Arginyl-tRNA synthetase
Core	aroA	E	COG0128	5-enolpyruvylshikimate-3-phosphate synthase
Core	aroB	E	COG0337	3-dehydroquinate synthetase
Core	aroC	E	COG0082	Chorismate synthase
Core	aroE	E	COG0169	Shikimate 5-dehydrogenase
Core	aroG	E	COG0722	3-deoxy-D-arabino-heptulosonate 7-phosphate (DAHP) synthase
Core	aroQ	E	COG0757	3-dehydroquinate dehydratase
Core	arsC	P	COG1393	Arsenate reductase or related protein, glutaredoxin family
Core	asd	E	COG0136	Aspartate-semialdehyde dehydrogenase
Core	aspS	J	COG0173	Aspartyl-tRNA synthetase
Core	aspT	R	COG2985	Uncharacterized membrane protein YbjL, putative transporter
Core	atpA	C	COG0056	FoF1-type ATP synthase, alpha subunit
Core	atpB	C	COG0356	FoF1-type ATP synthase, membrane subunit a
Core	atpD	C	COG0055	FoF1-type ATP synthase, beta subunit
Core	atpE	C	COG0636	FoF1-type ATP synthase, membrane subunit c/Archaeal/vacuolar-type H+-ATPase, subunit K
Core	atpG	C	COG0224	FoF1-type ATP synthase, gamma subunit
Core	atzF	J	COG0154	Asp-tRNAAsn/Glu-tRNAGln amidotransferase A subunit or related amidase
Core	baeS	T	COG5002	Sensor histidine kinase WalK
Core	bamA	M	COG4775	Outer membrane protein assembly factor BamA
Core	bamB	M	COG1520	Outer membrane protein assembly factor BamB, contains PQQ-like beta-propeller repeat
Core	bamC	M	COG3317	Outer membrane beta-barrel protein assembly factor BamC
Core	bamE	M	COG2885	Outer membrane protein OmpA and related peptidoglycan-associated (lipo)proteins
Core	bamE	M	COG2913	Outer membrane protein assembly factor BamE, lipoprotein component of the BamABCDE complex
Core	bcsA	N	COG1215	Glycosyltransferase, catalytic subunit of cellulose synthase and poly-beta-1,6-N-acetylglucosamine synthase
Core	bcsB	N	COG1215	Glycosyltransferase, catalytic subunit of cellulose synthase and poly-beta-1,6-N-acetylglucosamine synthase
Core	bcsP
Core	bcsQ	DN	COG1192	ParA-like ATPase involved in chromosome/plasmid partitioning or cellulose biosynthesis protein BcsQ
Core	bcsZ	G	COG3405	Endo-1,4-beta-D-glucanase Y
Core	betT	M	COG1292	Choline-glycine betaine transporter
Core	bfr	P	COG2193	Bacterioferritin (cytochrome b1)
Core	bioB	H	COG0502	Biotin synthase or related enzyme
Core	bioD	H	COG2226	Ubiquinone/menaquinone biosynthesis C-methylase UbiE/MenG
Core	bioD	H	COG0132	Dethiobiotin synthetase
Core	bioF	H	COG0156	7-keto-8-aminopelargonate synthetase or related enzyme
Core	brnQ	E	COG1114	Branched-chain amino acid permease
Core	cadR	K	COG0789	DNA-binding transcriptional regulator, MerR family
Core	carA	EF	COG0505	Carbamoylphosphate synthase small subunit
Core	carB	EF	COG0458	Carbamoylphosphate synthase large subunit
Core	catB	R	COG0110	Acetyltransferase, isoleucine patch superfamily
Core	ccsA	R	COG4137	ABC-type uncharacterized transport system, permease component
Core	cheA	T	COG0643	Chemotaxis protein histidine kinase CheA
Core	cheY	T	COG0784	CheY-like REC (receiver) domain, includes chemotaxis protein CheY and sporulation regulator Spo0F
Core	cheZ	NT	COG3143	Phosphoaspartate phosphatase CheZ, dephosphorylates CheY~P
Core	clcA	P	COG0038	H+/Cl- antiporter ClcA
Core	clpA	O	COG0542	ATP-dependent Clp protease, ATP-binding subunit ClpA
Core	clpB	O	COG0542	ATP-dependent Clp protease, ATP-binding subunit ClpA
Core	clpP	O	COG0740	ATP-dependent protease ClpP, protease subunit
Core	clpS	O	COG2127	ATP-dependent Clp protease adapter protein ClpS
Core	clpX	O	COG1219	ATP-dependent protease Clp, ATPase subunit ClpX
Core	cmk	F	COG0283	Cytidylate kinase
Core	coaBC	H	COG0452	Phosphopantothenoylcysteine synthetase/decarboxylase CoaBC
Core	coaD	H	COG0669	Phosphopantetheine adenylyltransferase
Core	coaE	H	COG0237	Dephospho-CoA kinase
Core	copD	P	COG1276	Putative copper export protein
Core	cpaB	UW	COG3745	Flp pilus assembly protein CpaB
Core	crcB	DP	COG0239	Fluoride ion exporter CrcB/FEX, affects chromosome condensation
Core	cueR	K	COG0789	DNA-binding transcriptional regulator, MerR family
Core	cyaY	P	COG1965	Fe-S cluster assembly protein CyaY, frataxin homolog
Core	cydB	C	COG1294	Cytochrome bd-type quinol oxidase, subunit 2
Core	cydC	CO	COG4987	ABC-type transport system involved in cytochrome bd biosynthesis, fused ATPase and permease components
Core	cydD	CO	COG4988	ABC-type transport system involved in cytochrome bd biosynthesis, ATPase and permease components
Core	cydX	S	COG4890	Predicted outer membrane lipoprotein
Core	cyoA	C	COG1622	Heme/copper-type cytochrome/quinol oxidase, subunit 2
Core	cyoB	C	COG0843	Heme/copper-type cytochrome/quinol oxidase, subunit 1
Core	cyoC	C	COG1845	Heme/copper-type cytochrome/quinol oxidase, subunit 3
Core	cyoD	C	COG3125	Heme/copper-type cytochrome/quinol oxidase, subunit 4
Core	cyoE	HI	COG0109	Polyprenyltransferase (heme O synthase)
Core	cysD	EH	COG0175	3'-phosphoadenosine 5'-phosphosulfate sulfotransferase (PAPS reductase)/FAD synthetase or related enzyme
Core	cysG	H	COG1648	Siroheme synthase (precorrin-2 oxidase/ferrochelatase domain)
Core	cysG	H	COG0007	Uroporphyrinogen-III methylase (siroheme synthase)
Core	cysM	E	COG0031	Cysteine synthase
Core	cysP	P	COG4150	ABC-type sulfate transport system, periplasmic component
Core	cysS	J	COG0215	Cysteinyl-tRNA synthetase
Core	cysT	P	COG0555	ABC-type sulfate transport system, permease component
Core	cysW	P	COG4208	ABC-type sulfate transport system, permease component
Core	dacB	M	COG2027	D-alanyl-D-alanine carboxypeptidase
Core	dapA	EM	COG0329	4-hydroxy-tetrahydrodipicolinate synthase/N-acetylneuraminate lyase
Core	dapB	E	COG0289	4-hydroxy-tetrahydrodipicolinate reductase
Core	dapC	E	COG0436	Aspartate/methionine/tyrosine aminotransferase
Core	dapD	E	COG2171	Tetrahydrodipicolinate N-succinyltransferase
Core	dapE	E	COG0624	Acetylornithine deacetylase/Succinyl-diaminopimelate desuccinylase or related deacylase
Core	dapF	E	COG0253	Diaminopimelate epimerase
Core	dbpA	L	COG0513	Superfamily II DNA and RNA helicase
Core	dcd	F	COG0717	dCTP deaminase
Core	dctP	G	COG1638	TRAP-type C4-dicarboxylate transport system, periplasmic component
Core	def	J	COG0242	Peptide deformylase
Core	der	J	COG1160	Double Era-like domain GTPase Der
Core	dgoD	MR	COG4948	L-alanine-DL-glutamate epimerase or related enzyme of enolase superfamily
Core	dinB	L	COG0389	Nucleotidyltransferase/DNA polymerase DinP involved in DNA repair
Core	dksA	K	COG1734	RNA polymerase-binding transcription factor DksA
Core	dld	C	COG0277	FAD/FMN-containing lactate dehydrogenase/glycolate oxidase
Core	dmpE	Q	COG3971	2-keto-4-pentenoate hydratase
Core	dmpG	E	COG0119	Isopropylmalate/homocitrate/citramalate synthases
Core	dmpH	Q	COG3971	2-keto-4-pentenoate hydratase
Core	dnaA	L	COG0593	Chromosomal replication initiation ATPase DnaA
Core	dnaE	L	COG0587	DNA polymerase III, alpha subunit
Core	dnaG	L	COG0358	DNA primase (bacterial type)
Core	dnaJ	O	COG0484	DnaJ-class molecular chaperone with C-terminal Zn finger domain
Core	dnaK	O	COG0443	Molecular chaperone DnaK (HSP70)
Core	dnaN	L	COG0592	DNA polymerase III sliding clamp (beta) subunit, PCNA homolog
Core	dnaQ	L	COG0847	DNA polymerase III, epsilon subunit or related 3'-5' exonuclease
Core	dnaX	L	COG2812	DNA polymerase III, gamma/tau subunits
Core	dprA	L	COG0758	Predicted Rossmann fold nucleotide-binding protein DprA/Smf involved in DNA uptake
Core	dsbD	O	COG4232	Thiol:disulfide interchange protein DsbD
Core	dsbG	O	COG1651	Protein thiol-disulfide isomerase DsbC
Core	dtd	J	COG1490	D-aminoacyl-tRNA deacylase
Core	dusA	J	COG0042	tRNA-dihydrouridine synthase
Core	dusB	J	COG0042	tRNA-dihydrouridine synthase
Core	dut	FV	COG0756	dUTP pyrophosphatase (dUTPase)
Core	dxs	HI	COG1154	Deoxyxylulose-5-phosphate synthase
Core	earP	J	COG4394	Elongation factor P Arg32-rhamnosyltransferase EarP
Core	eco	O	COG4574	Serine protease inhibitor ecotin
Core	ectA	E	COG1247	L-amino acid N-acyltransferase MnaT
Core	ectB	E	COG0160	Acetylornithine aminotransferase/4-aminobutyrate aminotransferase
Core	efeB	P	COG2837	Periplasmic deferrochelatase/peroxidase EfeB
Core	efeO	P	COG2822	Iron uptake system EfeUOB, periplasmic (or lipoprotein) component EfeO/EfeM
Core	efp	J	COG0231	Translation elongation factor P (EF-P)/translation initiation factor 5A (eIF-5A)
Core	ehuA	E	COG1126	ABC-type polar amino acid transport system, ATPase component
Core	ehuB	ET	COG0834	ABC-type amino acid transport/signal transduction system, periplasmic component/domain
Core	ehuC	E	COG0765	ABC-type amino acid transport system, permease component
Core	ehuD	E	COG0765	ABC-type amino acid transport system, permease component
Core	eno	G	COG0148	Enolase
Core	era	J	COG1159	GTPase Era, involved in 16S rRNA processing
Core	erpA	O	COG0316	Fe-S cluster assembly iron-binding protein IscA
Core	ettA	R	COG0488	ATPase components of ABC transporters with duplicated ATPase domains
Core	fabD	I	COG0331	Malonyl CoA-acyl carrier protein transacylase
Core	fabF	IQ	COG0304	3-oxoacyl-(acyl-carrier-protein) synthase
Core	fabG	I	COG1028	NAD(P)-dependent dehydrogenase, short-chain alcohol dehydrogenase family
Core	fabI	I	COG0623	Enoyl-[acyl-carrier-protein] reductase FabI
Core	fabZ	I	COG0764	3-hydroxymyristoyl/3-hydroxydecanoyl-(acyl carrier protein) dehydratase
Core	fdx	C	COG0633	Ferredoxin
Core	feaR	K	COG2207	AraC-type DNA-binding domain and AraC-containing proteins
Core	fepB	P	COG4592	ABC-type Fe2+-enterobactin transport system, periplasmic component
Core	ffh	U	COG0541	Signal recognition particle GTPase
Core	fghA	V	COG0627	S-formylglutathione hydrolase FrmB
Core	flgA	N	COG1261	Flagellar basal body P-ring formation protein FlgA
Core	flgB	N	COG1815	Flagellar basal body rod protein FlgB
Core	flgC	N	COG1558	Flagellar basal body rod protein FlgC
Core	flgD	N	COG1843	Flagellar hook-capping protein FlgD
Core	flgE	N	COG1749	Flagellar hook protein FlgE
Core	flgG	N	COG4786	Flagellar basal body rod protein FlgG
Core	flgJ	N	COG3951	Rod binding protein domain
Core	flgJ	MN	COG1705	Flagellum-specific peptidoglycan hydrolase FlgJ
Core	flgK	N	COG1256	Flagellar hook-associated protein FlgK
Core	flgL	N	COG1344	Flagellin and related hook-associated protein FlgL
Core	flgM	KN	COG2747	Negative regulator of flagellin synthesis (anti-sigma28 factor)
Core	flhA	N	COG1298	Flagellar biosynthesis protein FlhA
Core	flhB	N	COG1377	Flagellar biosynthesis protein FlhB
Core	flhC
Core	flhD
Core	flhF	N	COG1419	Flagellar biosynthesis GTPase FlhF
Core	fliD	N	COG1345	Flagellar capping protein FliD
Core	fliE	N	COG1677	Flagellar hook-basal body complex protein FliE
Core	fliF	NU	COG1766	Flagellar biosynthesis/type III secretory pathway M-ring protein FliF/YscJ
Core	fliG	N	COG1536	Flagellar motor switch protein FliG
Core	fliI	NU	COG1157	Flagellar biosynthesis/type III secretory pathway ATPase FliI
Core	fliJ	N	COG2882	Flagellar biosynthesis chaperone FliJ
Core	fliM	N	COG1868	Flagellar motor switch protein FliM
Core	fliN	NU	COG1886	Flagellar motor switch/type III secretory pathway protein FliN
Core	fliP	N	COG1338	Flagellar biosynthesis protein FliP
Core	fliQ	N	COG1987	Flagellar biosynthesis protein FliQ
Core	fliR	N	COG1684	Flagellar biosynthesis protein FliR
Core	fliS	NU	COG1516	Flagellin-specific chaperone FliS
Core	fliT
Core	fmt	J	COG0223	Methionyl-tRNA formyltransferase
Core	fnr	T	COG0664	cAMP-binding domain of CRP or a regulatory subunit of cAMP-dependent protein kinases
Core	folC	H	COG0285	Folylpolyglutamate synthase/Dihydropteroate synthase
Core	folD	H	COG0190	5,10-methylene-tetrahydrofolate dehydrogenase/Methenyl tetrahydrofolate cyclohydrolase
Core	folE2	H	COG1469	GTP cyclohydrolase FolE2
Core	folK	H	COG0801	7,8-dihydro-6-hydroxymethylpterin pyrophosphokinase (folate biosynthesis)
Core	folP	H	COG0294	Dihydropteroate synthase
Core	frr	J	COG0233	Ribosome recycling factor
Core	ftsA	D	COG0849	Cell division ATPase FtsA
Core	ftsB	D	COG2919	Cell division protein FtsB
Core	ftsH	O	COG0465	ATP-dependent Zn proteases
Core	ftsL	D	COG3116	Cell division protein FtsL, interacts with FtsB and FtsQ
Core	ftsW	D	COG0772	Peptodoglycan polymerase FtsW/RodA/SpoVE
Core	ftsY	U	COG0552	Signal recognition particle GTPase FtsY
Core	ftsZ	D	COG0206	Cell division GTPase FtsZ
Core	fumC	C	COG0114	Fumarate hydratase class II
Core	fusA	J	COG0480	Translation elongation factor EF-G, a GTPase
Core	gabD	I	COG1012	Acyl-CoA reductase or other NAD-dependent aldehyde dehydrogenase
Core	gabP	E	COG1113	L-asparagine transporter or related permease
Core	gadC	E	COG0531	Serine transporter YbeC, amino acid:H+ symporter family
Core	galU	M	COG1210	UTP-glucose-1-phosphate uridylyltransferase
Core	gap	G	COG0057	Glyceraldehyde-3-phosphate dehydrogenase/erythrose-4-phosphate dehydrogenase
Core	gatA	J	COG0154	Asp-tRNAAsn/Glu-tRNAGln amidotransferase A subunit or related amidase
Core	gatB	J	COG0064	Asp-tRNAAsn/Glu-tRNAGln amidotransferase B subunit
Core	gatC	J	COG0721	Asp-tRNAAsn/Glu-tRNAGln amidotransferase C subunit
Core	gcvH	E	COG0509	Glycine cleavage system protein H (lipoate-binding)
Core	gdhA	E	COG0334	Glutamate dehydrogenase/leucine dehydrogenase
Core	ggt	E	COG0405	Gamma-glutamyltranspeptidase
Core	glmM	G	COG1109	Phosphomannomutase
Core	glmS	M	COG0449	Glucosamine 6-phosphate synthetase, contains amidotransferase and phosphosugar isomerase domains
Core	glmU	M	COG1207	Bifunctional protein GlmU, N-acetylglucosamine-1-phosphate-uridyltransferase/glucosamine-1-phosphate-acetyltransferase
Core	glnA	E	COG0174	Glutamine synthetase
Core	glnE	O	COG1391	Glutamine synthetase adenylyltransferase
Core	glnL	T	COG3852	Signal transduction histidine kinase NtrB, nitrogen specific
Core	gloA	Q	COG0346	Catechol 2,3-dioxygenase or related enzyme, vicinal oxygen chelate (VOC) family
Core	gloB	R	COG0491	Glyoxylase or a related metal-dependent hydrolase, beta-lactamase superfamily II
Core	glpK	C	COG0554	Glycerol kinase
Core	glsA	E	COG2066	Glutaminase
Core	gltS	E	COG0786	Na+/glutamate symporter
Core	gltX	J	COG0008	Glutamyl- or glutaminyl-tRNA synthetase
Core	gluQRS	J	COG0008	Glutamyl- or glutaminyl-tRNA synthetase
Core	glyQ	J	COG0752	Glycyl-tRNA synthetase, alpha subunit
Core	glyS	J	COG0751	Glycyl-tRNA synthetase, beta subunit
Core	gmhB	E	COG0241	Histidinol phosphatase/D-glycero-mannoheptose bisphosphatephosphatase, HAD superfamily
Core	gmk	F	COG0194	Guanylate kinase
Core	gpmA	G	COG0588	Phosphoglycerate mutase (BPG-dependent)
Core	greA	K	COG0782	Transcription elongation factor, GreA/GreB family
Core	greB	K	COG0782	Transcription elongation factor, GreA/GreB family
Core	groL	O	COG0459	Chaperonin GroEL (HSP60 family)
Core	group_0	U	COG2911	Autotransporter translocation and assembly protein TamB
Core	group_100	P	COG4771	Outer membrane receptor for ferrienterochelin and colicins
Core	group_1000	ER	COG3185	4-hydroxyphenylpyruvate dioxygenase and related hemolysins
Core	group_1001	M	COG4313	Sphingosine uptake channel SphA-related outer membrane channel
Core	group_1002	ET	COG0834	ABC-type amino acid transport/signal transduction system, periplasmic component/domain
Core	group_1003	EP	COG1173	ABC-type dipeptide/oligopeptide/nickel transport system, permease component
Core	group_1006	M	COG0796	Glutamate racemase
Core	group_1007	R	COG3618	Predicted metal-dependent hydrolase, TIM-barrel fold
Core	group_1008	P	COG0730	Sulfite exporter TauE/SafE/YfcA and related permeases, UPF0721 family
Core	group_1009	I	COG0575	CDP-diglyceride synthetase
Core	group_101
Core	group_1010	L	COG1354	Chromatin segregation and condensation protein Rec8/ScpA/Scc1, kleisin family
Core	group_1013	E	COG4177	ABC-type branched-chain amino acid transport system, permease component
Core	group_1014	EH	COG0115	Branched-chain amino acid aminotransferase/4-amino-4-deoxychorismate lyase
Core	group_1015	P	COG4607	ABC-type enterochelin transport system, periplasmic component
Core	group_1016	F	COG0613	5'-3' exoribonuclease TrpH/YciV (RNase AM), contains PHP domain
Core	group_1017	G	COG0395	ABC-type glycerol-3-phosphate transport system, permease component
Core	group_1018	I	COG2084	3-hydroxyisobutyrate dehydrogenase or related beta-hydroxyacid dehydrogenase
Core	group_102	TK	COG0317	(p)ppGpp synthase/hydrolase, HD superfamily
Core	group_1020	T	COG0589	Nucleotide-binding universal stress protein, UspA family
Core	group_1021	P	COG4535	Mg2+ and Co2+ transporter CorC, contains CBS pair and CorC-HlyC domains
Core	group_1022	K	COG1737	DNA-binding transcriptional regulator, MurR/RpiR family, contains HTH and SIS domains
Core	group_1023	K	COG4977	Transcriptional regulator GlxA, contains an amidase domain and an AraC-type DNA-binding HTH domain
Core	group_1024	R	COG4120	ABC-type uncharacterized transport system, permease component
Core	group_1025	K	COG0583	DNA-binding transcriptional regulator, LysR family
Core	group_1026	K	COG0583	DNA-binding transcriptional regulator, LysR family
Core	group_1029	E	COG0559	Branched-chain amino acid ABC-type transport system, permease component
Core	group_103	P	COG4771	Outer membrane receptor for ferrienterochelin and colicins
Core	group_1030	K	COG1396	Transcriptional regulator, contains XRE-family HTH domain
Core	group_1031	K	COG2207	AraC-type DNA-binding domain and AraC-containing proteins
Core	group_1032	G	COG3588	Fructose-bisphosphate aldolase class 1
Core	group_1034	I	COG1028	NAD(P)-dependent dehydrogenase, short-chain alcohol dehydrogenase family
Core	group_1037	I	COG0657	Acetyl esterase/lipase
Core	group_1038	K	COG2207	AraC-type DNA-binding domain and AraC-containing proteins
Core	group_1039	M	COG4313	Sphingosine uptake channel SphA-related outer membrane channel
Core	group_104	M	COG3511	Phospholipase C
Core	group_1040	E	COG0559	Branched-chain amino acid ABC-type transport system, permease component
Core	group_1042	E	COG0559	Branched-chain amino acid ABC-type transport system, permease component
Core	group_1043	G	COG1082	Sugar phosphate isomerase/epimerase
Core	group_1044	G	COG3386	Sugar lactone lactonase YvrE
Core	group_1045	R	COG2607	Predicted ATPase, AAA+ superfamily
Core	group_1046	K	COG0583	DNA-binding transcriptional regulator, LysR family
Core	group_1047	R	COG1741	Redox-sensitive bicupin YhaK, pirin superfamily
Core	group_1049	P	COG1108	ABC-type Mn2+/Zn2+ transport system, permease component
Core	group_1050	K	COG3327	DNA-binding transcriptional regulator PaaX (phenylacetic acid degradation)
Core	group_1051	E	COG4177	ABC-type branched-chain amino acid transport system, permease component
Core	group_1052	E	COG0559	Branched-chain amino acid ABC-type transport system, permease component
Core	group_1053	UW	COG3745	Flp pilus assembly protein CpaB
Core	group_1054	P	COG1108	ABC-type Mn2+/Zn2+ transport system, permease component
Core	group_1055	G	COG1175	ABC-type sugar transport system, permease component
Core	group_1056
Core	group_1059	E	COG0159	Tryptophan synthase alpha chain
Core	group_106	M	COG3511	Phospholipase C
Core	group_1060	E	COG0559	Branched-chain amino acid ABC-type transport system, permease component
Core	group_1061	G	COG2513	2-Methylisocitrate lyase and related enzymes, PEP mutase family
Core	group_1062	R	COG0384	Predicted epimerase YddE/YHI9, PhzF superfamily
Core	group_1063	GER	COG0697	Permease of the drug/metabolite transporter (DMT) superfamily
Core	group_1066	P	COG2897	3-mercaptopyruvate sulfurtransferase SseA, contains two rhodanese domains
Core	group_1068	HR	COG0596	2-succinyl-6-hydroxy-2,4-cyclohexadiene-1-carboxylate synthase MenH and related esterases, alpha/beta hydrolase fold
Core	group_1069	GER	COG0697	Permease of the drug/metabolite transporter (DMT) superfamily
Core	group_107
Core	group_1071	E	COG0685	5,10-methylenetetrahydrofolate reductase
Core	group_1076	R	COG3568	Metal-dependent hydrolase, endonuclease/exonuclease/phosphatase family
Core	group_1077	I	COG1560	Palmitoleoyl-ACP: Kdo2-lipid-IV acyltransferase (lipid A biosynthesis)
Core	group_1079	M	COG0739	Murein DD-endopeptidase MepM and murein hydrolase activator NlpD, contains LysM domain
Core	group_108	M	COG1452	LPS assembly outer membrane protein LptD (organic solvent tolerance protein OstA)
Core	group_1080	Q	COG2514	Catechol-2,3-dioxygenase
Core	group_1081
Core	group_1083	H	COG0340	Biotin-(acetyl-CoA carboxylase) ligase
Core	group_1084	Q	COG3315	O-Methyltransferase involved in polyketide biosynthesis
Core	group_1086	HI	COG0109	Polyprenyltransferase (heme O synthase)
Core	group_1087	E	COG4176	ABC-type proline/glycine betaine transport system, permease component
Core	group_1088	P	COG1116	ABC-type nitrate/sulfonate/bicarbonate transport system, ATPase component
Core	group_109	L	COG1198	Primosomal protein N' (replication factor Y) - superfamily II helicase
Core	group_1090	D	COG3087	Cell division protein FtsN
Core	group_1090	M	COG0797	Peptidoglycan lytic transglycosylase RlpA, contains C-terminal SPOR domain
Core	group_1093	G	COG0662	Mannose-6-phosphate isomerase, cupin superfamily
Core	group_1093	K	COG2207	AraC-type DNA-binding domain and AraC-containing proteins
Core	group_1094	M	COG1127	ATPase subunit MlaF of the ABC-type intermembrane phospholipid transporter Mla
Core	group_1095	P	COG1108	ABC-type Mn2+/Zn2+ transport system, permease component
Core	group_1096	Q	COG3384	Aromatic ring-opening dioxygenase, catalytic subunit, LigB family
Core	group_1098	T	COG3228	Mlc titration factor MtfA, regulates ptsG expression
Core	group_1099	M	COG3023	N-acetyl-anhydromuramyl-L-alanine amidase AmpD
Core	group_11	S	COG3164	Uncharacterized conserved protein YhdP, contains DUF3971 and AsmA2 domains
Core	group_110	V	COG2274	ABC-type bacteriocin/lantibiotic exporters, contain an N-terminal double-glycine peptidase domain
Core	group_1100	S	COG3619	Uncharacterized membrane protein YoaK, UPF0700 family
Core	group_1101	L	COG2840	DNA-nicking endonuclease, Smr domain
Core	group_1102	K	COG1414	DNA-binding transcriptional regulator, IclR family
Core	group_1103	I	COG1968	Undecaprenyl pyrophosphate phosphatase
Core	group_1104	R	COG2321	Predicted metalloprotease
Core	group_1107	K	COG1737	DNA-binding transcriptional regulator, MurR/RpiR family, contains HTH and SIS domains
Core	group_1108	P	COG2375	NADPH-dependent ferric siderophore reductase, contains FAD-binding and SIP domains
Core	group_1109	UW	COG4965	Flp pilus assembly protein TadB
Core	group_1110	M	COG0810	Periplasmic protein TonB, links inner and outer membranes
Core	group_1111	K	COG2207	AraC-type DNA-binding domain and AraC-containing proteins
Core	group_1112	GM	COG0726	Peptidoglycan/xylan/chitin deacetylase, PgdA/NodB/CDA1 family
Core	group_1115	P	COG4558	ABC-type hemin transport system, periplasmic component
Core	group_1116	P	COG0600	ABC-type nitrate/sulfonate/bicarbonate transport system, permease component
Core	group_1119	E	COG1177	ABC-type spermidine/putrescine transport system, permease component II
Core	group_112	C	COG2225	Malate synthase
Core	group_1120	P	COG0555	ABC-type sulfate transport system, permease component
Core	group_1122	H	COG1809	Phosphosulfolactate synthase, CoM biosynthesis protein A
Core	group_1123	GER	COG0697	Permease of the drug/metabolite transporter (DMT) superfamily
Core	group_1124	EP	COG1173	ABC-type dipeptide/oligopeptide/nickel transport system, permease component
Core	group_1125	H	COG0325	Pyridoxal 5'-phosphate homeostasis protein YggS, UPF0001 family
Core	group_1126	N	COG0084	3'->5' ssDNA/RNA exonuclease TatD
Core	group_1127	H	COG1587	Uroporphyrinogen-III synthase
Core	group_1128
Core	group_1129	M	COG1127	ATPase subunit MlaF of the ABC-type intermembrane phospholipid transporter Mla
Core	group_1130	Q	COG3384	Aromatic ring-opening dioxygenase, catalytic subunit, LigB family
Core	group_1131	M	COG0668	Small-conductance mechanosensitive channel
Core	group_1133	I	COG1560	Palmitoleoyl-ACP: Kdo2-lipid-IV acyltransferase (lipid A biosynthesis)
Core	group_1134
Core	group_1135	P	COG2375	NADPH-dependent ferric siderophore reductase, contains FAD-binding and SIP domains
Core	group_1136	P	COG4208	ABC-type sulfate transport system, permease component
Core	group_1137	T	COG1806	Regulator of PEP synthase PpsR, kinase-PPPase family (combines ADP:protein kinase and phosphorylase activities)
Core	group_1138	T	COG0639	Diadenosine tetraphosphatase ApaH/serine/threonine protein phosphatase, PP2A family
Core	group_1139	GER	COG0697	Permease of the drug/metabolite transporter (DMT) superfamily
Core	group_114	R	COG3211	Secreted phosphatase, PhoX family
Core	group_1140	ET	COG0834	ABC-type amino acid transport/signal transduction system, periplasmic component/domain
Core	group_1141	G	COG0637	Beta-phosphoglucomutase, HAD superfamily
Core	group_1142	Q	COG3384	Aromatic ring-opening dioxygenase, catalytic subunit, LigB family
Core	group_1143	P	COG1116	ABC-type nitrate/sulfonate/bicarbonate transport system, ATPase component
Core	group_1144	I	COG1443	Isopentenyldiphosphate isomerase
Core	group_1145	R	COG3176	Putative hemolysin
Core	group_1148	ET	COG0834	ABC-type amino acid transport/signal transduction system, periplasmic component/domain
Core	group_115	M	COG1368	Phosphoglycerol transferase MdoB/OpgB, AlkP superfamily
Core	group_1151	L	COG1058	ADP-ribose pyrophosphatase domain of DNA damage- and competence-inducible protein CinA
Core	group_1152	R	COG1917	Cupin domain protein related to quercetin dioxygenase
Core	group_1152	K	COG2207	AraC-type DNA-binding domain and AraC-containing proteins
Core	group_1153	O	COG2518	Protein-L-isoaspartate O-methyltransferase
Core	group_1154	E	COG0411	ABC-type branched-chain amino acid transport system, ATPase component LivG
Core	group_1156	S	COG3159	Uncharacterized conserved protein YigA, DUF484 family
Core	group_1157	H	COG2226	Ubiquinone/menaquinone biosynthesis C-methylase UbiE/MenG
Core	group_1158	K	COG1414	DNA-binding transcriptional regulator, IclR family
Core	group_1159	Q	COG3384	Aromatic ring-opening dioxygenase, catalytic subunit, LigB family
Core	group_116	P	COG4771	Outer membrane receptor for ferrienterochelin and colicins
Core	group_1160	HR	COG0596	2-succinyl-6-hydroxy-2,4-cyclohexadiene-1-carboxylate synthase MenH and related esterases, alpha/beta hydrolase fold
Core	group_1161	ET	COG0834	ABC-type amino acid transport/signal transduction system, periplasmic component/domain
Core	group_1162	M	COG3637	Opacity protein LomR and related surface antigens
Core	group_1163
Core	group_1164	P	COG0730	Sulfite exporter TauE/SafE/YfcA and related permeases, UPF0721 family
Core	group_1165	HR	COG0596	2-succinyl-6-hydroxy-2,4-cyclohexadiene-1-carboxylate synthase MenH and related esterases, alpha/beta hydrolase fold
Core	group_1167	H	COG2022	Thiazole synthase ThiGH, ThiG subunit (thiamin biosynthesis)
Core	group_1168	M	COG0463	Glycosyltransferase involved in cell wall bisynthesis
Core	group_1169	M	COG2853	Lipoprotein subunit MlaA of the ABC-type intermembrane phospholipid transporter Mla
Core	group_117	CE	COG1966	Carbon starvation protein CstA (peptide/pyruvate transporter)
Core	group_1171	L	COG0692	Uracil-DNA glycosylase
Core	group_1172	P	COG1464	ABC-type metal ion transport system, periplasmic component/surface antigen
Core	group_1173	E	COG0411	ABC-type branched-chain amino acid transport system, ATPase component LivG
Core	group_1174	K	COG2188	DNA-binding transcriptional regulator, GntR family
Core	group_1177	S	COG5473	Uncharacterized membrane protein
Core	group_1178	I	COG0671	Membrane-associated phospholipid phosphatase
Core	group_1179	TK	COG2197	DNA-binding response regulator, NarL/FixJ family, contains REC and HTH domains
Core	group_118	L	COG0420	DNA repair exonuclease SbcCD nuclease subunit
Core	group_1180	R	COG2819	Predicted hydrolase of the alpha/beta superfamily
Core	group_1181	Q	COG3971	2-keto-4-pentenoate hydratase
Core	group_1182	E	COG1177	ABC-type spermidine/putrescine transport system, permease component II
Core	group_1185
Core	group_1186
Core	group_1187	E	COG1712	L-aspartate dehydrogenase, NAD(P)-dependent
Core	group_1188	K	COG1414	DNA-binding transcriptional regulator, IclR family
Core	group_1190	P	COG0730	Sulfite exporter TauE/SafE/YfcA and related permeases, UPF0721 family
Core	group_1191	L	COG0708	Exonuclease III
Core	group_1192	I	COG1028	NAD(P)-dependent dehydrogenase, short-chain alcohol dehydrogenase family
Core	group_1193	DN	COG1192	ParA-like ATPase involved in chromosome/plasmid partitioning or cellulose biosynthesis protein BcsQ
Core	group_1194	H	COG0351	Hydroxymethylpyrimidine/phosphomethylpyrimidine kinase
Core	group_1195	V	COG1131	ABC-type multidrug transport system, ATPase component
Core	group_1196	M	COG4105	Outer membrane protein assembly factor BamD, BamD/ComL family
Core	group_1197	I	COG1028	NAD(P)-dependent dehydrogenase, short-chain alcohol dehydrogenase family
Core	group_12	L	COG1074	3’-5’ helicase subunit RecB of the DNA repair enzyme RecBCD (exonuclease V)
Core	group_120	R	COG3209	Uncharacterized conserved protein RhaS, contains 28 RHS repeats
Core	group_1200	H	COG1521	Pantothenate kinase type III
Core	group_1201	F	COG0207	Thymidylate synthase
Core	group_1202	PH	COG1120	ABC-type cobalamin/Fe3+-siderophores transport system, ATPase component
Core	group_1203	TK	COG0745	DNA-binding response regulator, OmpR family, contains REC and winged-helix (wHTH) domain
Core	group_1204	R	COG1101	ABC-type uncharacterized transport system, ATPase component
Core	group_1205	M	COG2908	UDP-2,3-diacylglucosamine pyrophosphatase LpxH
Core	group_1206	E	COG1878	Kynurenine formamidase
Core	group_1207	MV	COG3015	Uncharacterized lipoprotein NlpE involved in copper resistance
Core	group_1208
Core	group_1209	V	COG0842	ABC-type multidrug transport system, permease component
Core	group_121	O	COG0339	Zn-dependent oligopeptidase, M3 family
Core	group_1210	E	COG1712	L-aspartate dehydrogenase, NAD(P)-dependent
Core	group_1211	I	COG1028	NAD(P)-dependent dehydrogenase, short-chain alcohol dehydrogenase family
Core	group_1213	O	COG3187	Heat shock protein HslJ
Core	group_1214	M	COG0741	Soluble lytic murein transglycosylase or regulatory protein s ( may contain LysM/invasin domain)
Core	group_1215	I	COG1028	NAD(P)-dependent dehydrogenase, short-chain alcohol dehydrogenase family
Core	group_1216	K	COG2207	AraC-type DNA-binding domain and AraC-containing proteins
Core	group_1217	E	COG0411	ABC-type branched-chain amino acid transport system, ATPase component LivG
Core	group_1219	E	COG1126	ABC-type polar amino acid transport system, ATPase component
Core	group_122	T	COG2202	PAS domain
Core	group_122	T	COG4191	Signal transduction histidine kinase regulating C4-dicarboxylate transport system
Core	group_1220	L	COG3298	Predicted 3'-5' exonuclease related to the exonuclease domain of PolB
Core	group_1221	ET	COG0834	ABC-type amino acid transport/signal transduction system, periplasmic component/domain
Core	group_1222	P	COG1464	ABC-type metal ion transport system, periplasmic component/surface antigen
Core	group_1223	P	COG0600	ABC-type nitrate/sulfonate/bicarbonate transport system, permease component
Core	group_1224	I	COG1028	NAD(P)-dependent dehydrogenase, short-chain alcohol dehydrogenase family
Core	group_1225	I	COG1024	Enoyl-CoA hydratase/carnithine racemase
Core	group_1227	R	COG1451	UTP pyrophosphatase, metal-dependent hydrolase family
Core	group_1229	I	COG1028	NAD(P)-dependent dehydrogenase, short-chain alcohol dehydrogenase family
Core	group_1230	K	COG1414	DNA-binding transcriptional regulator, IclR family
Core	group_1231	G	COG0483	Archaeal fructose-1,6-bisphosphatase or related enzyme, inositol monophosphatase family
Core	group_1234	E	COG0411	ABC-type branched-chain amino acid transport system, ATPase component LivG
Core	group_1235	O	COG0760	Peptidyl-prolyl isomerase, parvulin family
Core	group_1236	M	COG0451	Nucleoside-diphosphate-sugar epimerase
Core	group_1237	I	COG1028	NAD(P)-dependent dehydrogenase, short-chain alcohol dehydrogenase family
Core	group_124	P	COG1629	Outer membrane receptor protein, Fe transport
Core	group_1242	K	COG1802	DNA-binding transcriptional regulator, GntR family
Core	group_1243	C	COG1018	Flavodoxin/ferredoxin--NADP reductase
Core	group_1244	J	COG0566	tRNA G18 (ribose-2'-O)-methylase SpoU
Core	group_1245	Q	COG3971	2-keto-4-pentenoate hydratase
Core	group_1246	J	COG0565	tRNA C32,U32 (ribose-2'-O)-methylase TrmJ or a related methyltransferase
Core	group_1248	Q	COG0179	2-keto-4-pentenoate hydratase/2-oxohepta-3-ene-1,7-dioic acid hydratase (catechol pathway)
Core	group_1249	C	COG1018	Flavodoxin/ferredoxin--NADP reductase
Core	group_125	L	COG0210	Superfamily I DNA or RNA helicase
Core	group_1250	I	COG1028	NAD(P)-dependent dehydrogenase, short-chain alcohol dehydrogenase family
Core	group_1251	R	COG1917	Cupin domain protein related to quercetin dioxygenase
Core	group_1251	K	COG2207	AraC-type DNA-binding domain and AraC-containing proteins
Core	group_1252	L	COG4335	3-methylpurine DNA glycosylase AlkC
Core	group_1253	ET	COG0834	ABC-type amino acid transport/signal transduction system, periplasmic component/domain
Core	group_1254	H	COG0327	Putative GTP cyclohydrolase 1 type 2, NIF3 family
Core	group_1255	P	COG0600	ABC-type nitrate/sulfonate/bicarbonate transport system, permease component
Core	group_1257	R	COG3683	ABC-type uncharacterized transport system, periplasmic component
Core	group_1258	P	COG4604	ABC-type enterochelin transport system, ATPase component
Core	group_1259	E	COG3842	ABC-type Fe3+/spermidine/putrescine transport systems, ATPase component
Core	group_126	S	COG5316	Uncharacterized protein, contains DUF4139 domain
Core	group_1260	I	COG1024	Enoyl-CoA hydratase/carnithine racemase
Core	group_1261
Core	group_1262
Core	group_1263	I	COG1028	NAD(P)-dependent dehydrogenase, short-chain alcohol dehydrogenase family
Core	group_1266	I	COG0623	Enoyl-[acyl-carrier-protein] reductase FabI
Core	group_1268	C	COG4221	NADP-dependent 3-hydroxy acid dehydrogenase YdfG
Core	group_1269	K	COG2207	AraC-type DNA-binding domain and AraC-containing proteins
Core	group_1270	N	COG0084	3'->5' ssDNA/RNA exonuclease TatD
Core	group_1275	O	COG1651	Protein thiol-disulfide isomerase DsbC
Core	group_1276	E	COG0411	ABC-type branched-chain amino acid transport system, ATPase component LivG
Core	group_1277	R	COG2320	GrpB domain, predicted nucleotidyltransferase, UPF0157 family
Core	group_1278	D	COG4942	Septal ring factor EnvC, activator of murein hydrolases AmiA and AmiB
Core	group_1279	E	COG1540	5-oxoprolinase subunit A
Core	group_128	O	COG0760	Peptidyl-prolyl isomerase, parvulin family
Core	group_1280	R	COG3926	Lysozyme family protein
Core	group_1281	I	COG1028	NAD(P)-dependent dehydrogenase, short-chain alcohol dehydrogenase family
Core	group_1283	I	COG1028	NAD(P)-dependent dehydrogenase, short-chain alcohol dehydrogenase family
Core	group_1284	E	COG0411	ABC-type branched-chain amino acid transport system, ATPase component LivG
Core	group_1285	I	COG1028	NAD(P)-dependent dehydrogenase, short-chain alcohol dehydrogenase family
Core	group_1287	T	COG1409	3',5'-cyclic AMP phosphodiesterase CpdA
Core	group_1288	I	COG1028	NAD(P)-dependent dehydrogenase, short-chain alcohol dehydrogenase family
Core	group_1289	M	COG3713	Outer membrane scaffolding protein for murein synthesis, MipA/OmpV family
Core	group_1290	L	COG0496	Broad specificity polyphosphatase and 5'/3'-nucleotidase SurE
Core	group_1291	P	COG0730	Sulfite exporter TauE/SafE/YfcA and related permeases, UPF0721 family
Core	group_1292	I	COG1028	NAD(P)-dependent dehydrogenase, short-chain alcohol dehydrogenase family
Core	group_1293	J	COG1054	tRNA U34 5'-hydroxylase TrhO, rhodanese family
Core	group_1294	E	COG1126	ABC-type polar amino acid transport system, ATPase component
Core	group_1295	P	COG4525	ABC-type taurine transport system, ATPase component
Core	group_1296	I	COG1028	NAD(P)-dependent dehydrogenase, short-chain alcohol dehydrogenase family
Core	group_1297	E	COG0765	ABC-type amino acid transport system, permease component
Core	group_1298	E	COG1126	ABC-type polar amino acid transport system, ATPase component
Core	group_13	U	COG2911	Autotransporter translocation and assembly protein TamB
Core	group_130	L	COG1199	Rad3-related DNA helicase DinG
Core	group_1301	E	COG0411	ABC-type branched-chain amino acid transport system, ATPase component LivG
Core	group_1302	J	COG1187	Pseudouridylate synthase RsuA, specific for 16S rRNA U516 and 23S rRNA U2605
Core	group_1303	H	COG0476	Molybdopterin or thiamine biosynthesis adenylyltransferase
Core	group_1305	PH	COG1120	ABC-type cobalamin/Fe3+-siderophores transport system, ATPase component
Core	group_1306	I	COG0204	1-acyl-sn-glycerol-3-phosphate acyltransferase
Core	group_1307	E	COG0410	ABC-type branched-chain amino acid transport system, ATPase component LivF
Core	group_1308	EH	COG0175	3'-phosphoadenosine 5'-phosphosulfate sulfotransferase (PAPS reductase)/FAD synthetase or related enzyme
Core	group_1310	ET	COG0834	ABC-type amino acid transport/signal transduction system, periplasmic component/domain
Core	group_1311	I	COG1028	NAD(P)-dependent dehydrogenase, short-chain alcohol dehydrogenase family
Core	group_1315	E	COG0421	Spermidine synthase (polyamine aminopropyltransferase)
Core	group_1316	K	COG1414	DNA-binding transcriptional regulator, IclR family
Core	group_1317	P	COG1121	ABC-type Mn2+/Zn2+ transport system, ATPase component
Core	group_1318	E	COG0410	ABC-type branched-chain amino acid transport system, ATPase component LivF
Core	group_1319	ET	COG0834	ABC-type amino acid transport/signal transduction system, periplasmic component/domain
Core	group_132	M	COG0741	Soluble lytic murein transglycosylase or regulatory protein s ( may contain LysM/invasin domain)
Core	group_1320	M	COG2823	Osmotically-inducible protein OsmY, contains BON domain
Core	group_1325	H	COG1402	Creatinine amidohydrolase/Fe(II)-dependent FAPy formamide hydrolase (riboflavin and F420 biosynthesis)
Core	group_1326	I	COG1028	NAD(P)-dependent dehydrogenase, short-chain alcohol dehydrogenase family
Core	group_1327	I	COG0204	1-acyl-sn-glycerol-3-phosphate acyltransferase
Core	group_1328
Core	group_1329	I	COG1028	NAD(P)-dependent dehydrogenase, short-chain alcohol dehydrogenase family
Core	group_1330	E	COG1126	ABC-type polar amino acid transport system, ATPase component
Core	group_1331	T	COG0478	RIO-like serine/threonine protein kinase fused to N-terminal HTH domain
Core	group_1332	E	COG0410	ABC-type branched-chain amino acid transport system, ATPase component LivF
Core	group_1335	M	COG1346	Putative effector of murein hydrolase
Core	group_1336	JO	COG1670	Protein N-acetyltransferase, RimJ/RimL family
Core	group_1337	K	COG1802	DNA-binding transcriptional regulator, GntR family
Core	group_1341	I	COG1028	NAD(P)-dependent dehydrogenase, short-chain alcohol dehydrogenase family
Core	group_1342	M	COG1136	ABC-type lipoprotein export system, ATPase component
Core	group_1344	J	COG0313	16S rRNA C1402 (ribose-2'-O) methylase RsmI
Core	group_1345	J	COG0684	RNA degradosome component RraA (regulator of RNase E activity)
Core	group_1346	I	COG1028	NAD(P)-dependent dehydrogenase, short-chain alcohol dehydrogenase family
Core	group_1347	R	COG3382	B3/B4 domain (DNA/RNA-binding domain of Phe-tRNA-synthetase)
Core	group_1348	HR	COG0596	2-succinyl-6-hydroxy-2,4-cyclohexadiene-1-carboxylate synthase MenH and related esterases, alpha/beta hydrolase fold
Core	group_1349	M	COG0810	Periplasmic protein TonB, links inner and outer membranes
Core	group_1351	F	COG0518	GMP synthase, glutamine amidotransferase domain
Core	group_1352	E	COG0765	ABC-type amino acid transport system, permease component
Core	group_1353	E	COG4160	ABC-type arginine/histidine transport system, permease component
Core	group_1354	E	COG0765	ABC-type amino acid transport system, permease component
Core	group_1358	T	COG0664	cAMP-binding domain of CRP or a regulatory subunit of cAMP-dependent protein kinases
Core	group_1359	E	COG0410	ABC-type branched-chain amino acid transport system, ATPase component LivF
Core	group_1360	P	COG1285	Magnesium uptake protein YhiD/SapB, involved in acid resistance
Core	group_1361	C	COG0479	Succinate dehydrogenase/fumarate reductase, Fe-S protein subunit
Core	group_1362	R	COG1741	Redox-sensitive bicupin YhaK, pirin superfamily
Core	group_1363	E	COG0410	ABC-type branched-chain amino acid transport system, ATPase component LivF
Core	group_1364	E	COG0410	ABC-type branched-chain amino acid transport system, ATPase component LivF
Core	group_1366	TK	COG0745	DNA-binding response regulator, OmpR family, contains REC and winged-helix (wHTH) domain
Core	group_1368	E	COG0560	Phosphoserine phosphatase
Core	group_1369	JM	COG1208	NDP-sugar pyrophosphorylase, includes eIF-2Bgamma, eIF-2Bepsilon, and LPS biosynthesis protein s
Core	group_1370	K	COG2186	DNA-binding transcriptional regulator, FadR family
Core	group_1371	E	COG0765	ABC-type amino acid transport system, permease component
Core	group_1372	P	COG0861	Tellurite resistance membrane protein TerC
Core	group_1374	H	COG0325	Pyridoxal 5'-phosphate homeostasis protein YggS, UPF0001 family
Core	group_1376	E	COG0410	ABC-type branched-chain amino acid transport system, ATPase component LivF
Core	group_1377	E	COG0410	ABC-type branched-chain amino acid transport system, ATPase component LivF
Core	group_1378	L	COG1525	Endonuclease YncB, thermonuclease family
Core	group_1379	X	COG1943	REP element-mobilizing transposase RayT
Core	group_1380	E	COG0410	ABC-type branched-chain amino acid transport system, ATPase component LivF
Core	group_1383	E	COG0683	ABC-type branched-chain amino acid transport system, periplasmic component
Core	group_1384	P	COG0670	Integral membrane protein YbhL, putative Ca2+ regulator, Bax inhibitor (BI-1)/TMBIM family
Core	group_1385	Q	COG3473	Maleate cis-trans isomerase
Core	group_1386	E	COG1296	Predicted branched-chain amino acid permease (azaleucine resistance)
Core	group_1387
Core	group_1388	TK	COG0745	DNA-binding response regulator, OmpR family, contains REC and winged-helix (wHTH) domain
Core	group_1389	E	COG0410	ABC-type branched-chain amino acid transport system, ATPase component LivF
Core	group_139	T	COG1524	c-di-AMP phosphodiesterase AtaC or nucleotide pyrophosphatase, AlkP superfamily
Core	group_1390	M	COG0586	Membrane integrity protein DedA, putative transporter, DedA/Tvp38 family
Core	group_1393	Q	COG0179	2-keto-4-pentenoate hydratase/2-oxohepta-3-ene-1,7-dioic acid hydratase (catechol pathway)
Core	group_1394	T	COG5002	Sensor histidine kinase WalK
Core	group_1395	I	COG1788	Acyl CoA:acetate/3-ketoacid CoA transferase, alpha subunit
Core	group_1397	TK	COG0745	DNA-binding response regulator, OmpR family, contains REC and winged-helix (wHTH) domain
Core	group_1398	M	COG1794	Amino acid racemase YgeA
Core	group_1399	Q	COG4181	Predicted ABC-type transport system involved in lysophospholipase L1 biosynthesis, ATPase component
Core	group_14	T	COG0784	CheY-like REC (receiver) domain, includes chemotaxis protein CheY and sporulation regulator Spo0F
Core	group_14	E	COG0591	Na+/proline symporter
Core	group_14	T	COG0642	Signal transduction histidine kinase
Core	group_1400	E	COG0765	ABC-type amino acid transport system, permease component
Core	group_1401	Q	COG0412	Dienelactone hydrolase
Core	group_1402	EG	COG0235	5-methylthioribulose/5-deoxyribulose/Fuculose 1-phosphate aldolase (methionine salvage, sugar degradation)
Core	group_1403	P	COG0725	ABC-type molybdate transport system, periplasmic Mo-binding protein ModA
Core	group_1404	E	COG2011	ABC-type methionine transport system, permease component
Core	group_1407	M	COG1462	Curli biogenesis system outer membrane secretion channel CsgG
Core	group_1409	T	COG2808	Predicted FMN-binding regulatory protein PaiB
Core	group_141	S	COG1289	Uncharacterized membrane protein YccC
Core	group_1410	G	COG0637	Beta-phosphoglucomutase, HAD superfamily
Core	group_1411	D	COG3087	Cell division protein FtsN
Core	group_1412	R	COG0400	Predicted esterase
Core	group_1413	M	COG2854	Periplasmic subunit MlaC of the ABC-type intermembrane phospholipid transporter Mla
Core	group_1416	Q	COG0179	2-keto-4-pentenoate hydratase/2-oxohepta-3-ene-1,7-dioic acid hydratase (catechol pathway)
Core	group_1417	O	COG2518	Protein-L-isoaspartate O-methyltransferase
Core	group_1419	TK	COG2197	DNA-binding response regulator, NarL/FixJ family, contains REC and HTH domains
Core	group_1420	J	COG1636	Epoxyqueuosine reductase QueH (tRNA modification)
Core	group_1421	C	COG0546	Phosphoglycolate phosphatase, HAD superfamily
Core	group_1422	E	COG2095	Small neutral amino acid transporter SnatA, MarC family
Core	group_1424	PR	COG1122	Energy-coupling factor transporter ATP-binding protein EcfA2
Core	group_1425
Core	group_1427	T	COG3109	sRNA-binding protein ProQ
Core	group_143	G	COG2120	N-acetylglucosaminyl deacetylase, LmbE family
Core	group_1430
Core	group_1431
Core	group_1433	TK	COG2197	DNA-binding response regulator, NarL/FixJ family, contains REC and HTH domains
Core	group_1434	K	COG1802	DNA-binding transcriptional regulator, GntR family
Core	group_1435	O	COG0625	Glutathione S-transferase
Core	group_1436	TK	COG0745	DNA-binding response regulator, OmpR family, contains REC and winged-helix (wHTH) domain
Core	group_1437	S	COG3863	Uncharacterized conserved protein YycO, NlpC/P60 family
Core	group_1438	T	COG2204	DNA-binding transcriptional response regulator, NtrC family, contains REC, AAA-type ATPase, and a Fis-type DNA-binding domains
Core	group_1439	R	COG3382	B3/B4 domain (DNA/RNA-binding domain of Phe-tRNA-synthetase)
Core	group_1440	UW	COG5010	Flp pilus assembly protein TadD, contains TPR repeats
Core	group_1442	E	COG2011	ABC-type methionine transport system, permease component
Core	group_1443	J	COG1738	Queuosine precursor transporter YhhQ, DUF165 family
Core	group_1444	E	COG0765	ABC-type amino acid transport system, permease component
Core	group_1446
Core	group_1447	E	COG0765	ABC-type amino acid transport system, permease component
Core	group_1449	R	COG2945	Alpha/beta superfamily hydrolase
Core	group_1450
Core	group_1451	S	COG4380	Uncharacterized conserved protein, DUF799 domain
Core	group_1454	K	COG1309	DNA-binding protein, AcrR family, includes nucleoid occlusion protein SlmA
Core	group_1455	E	COG0703	Shikimate kinase
Core	group_1456	C	COG0546	Phosphoglycolate phosphatase, HAD superfamily
Core	group_1457	R	COG1881	Uncharacterized conserved protein, phosphatidylethanolamine-binding protein (PEBP) family
Core	group_1458	O	COG0652	Peptidyl-prolyl cis-trans isomerase (rotamase) - cyclophilin family
Core	group_1461	E	COG0765	ABC-type amino acid transport system, permease component
Core	group_1464	K	COG1309	DNA-binding protein, AcrR family, includes nucleoid occlusion protein SlmA
Core	group_1465	I	COG2057	Acyl-CoA:acetate/3-ketoacid CoA transferase, beta subunit
Core	group_1466	G	COG0800	2-keto-3-deoxy-6-phosphogluconate aldolase
Core	group_1467	K	COG1309	DNA-binding protein, AcrR family, includes nucleoid occlusion protein SlmA
Core	group_1469	H	COG3165	Ubiquinone biosynthesis protein UbiJ, contains SCP2 domain
Core	group_147	M	COG1136	ABC-type lipoprotein export system, ATPase component
Core	group_147	V	COG0577	ABC-type antimicrobial peptide transport system, permease component
Core	group_1470	TK	COG4566	DNA-binding response regulator, FixJ family, consists of REC and HTH domains
Core	group_1471
Core	group_1472	V	COG0450	Alkyl hydroperoxide reductase subunit AhpC (peroxiredoxin)
Core	group_1474	C	COG0839	NADH:ubiquinone oxidoreductase subunit 6 (chain J)
Core	group_1475	T	COG2976	Putative negative regulator of RcsB-dependent stress response, UPF0070 family
Core	group_1476	E	COG0135	Phosphoribosylanthranilate isomerase
Core	group_1477	O	COG3531	Predicted protein-disulfide isomerase, contains CxxC motif
Core	group_1480	H	COG0212	5-formyltetrahydrofolate cyclo-ligase
Core	group_1481	F	COG1051	ADP-ribose pyrophosphatase YjhB, NUDIX family
Core	group_1482
Core	group_1484	K	COG1309	DNA-binding protein, AcrR family, includes nucleoid occlusion protein SlmA
Core	group_1485	O	COG0625	Glutathione S-transferase
Core	group_149	R	COG0488	ATPase components of ABC transporters with duplicated ATPase domains
Core	group_1490	M	COG0791	Cell wall-associated hydrolase, NlpC_P60 family
Core	group_1491	C	COG1845	Heme/copper-type cytochrome/quinol oxidase, subunit 3
Core	group_1492	Q	COG4665	TRAP-type mannitol/chloroaromatic compound transport system, small permease component
Core	group_1493	J	COG0293	23S rRNA U2552 (ribose-2'-O)-methylase RlmE/FtsJ
Core	group_1494	K	COG1309	DNA-binding protein, AcrR family, includes nucleoid occlusion protein SlmA
Core	group_1497	E	COG1280	Threonine/homoserine/homoserine lactone efflux protein
Core	group_1498	K	COG1309	DNA-binding protein, AcrR family, includes nucleoid occlusion protein SlmA
Core	group_1499	O	COG1651	Protein thiol-disulfide isomerase DsbC
Core	group_15	J	COG1530	Ribonuclease G or E
Core	group_1500	H	COG0307	Riboflavin synthase alpha chain
Core	group_1501	L	COG0122	3-methyladenine DNA glycosylase/8-oxoguanine DNA glycosylase
Core	group_1504	J	COG0009	tRNA A37 threonylcarbamoyladenosine synthetase subunit TsaC/SUA5/YrdC
Core	group_1505	E	COG1280	Threonine/homoserine/homoserine lactone efflux protein
Core	group_1506	E	COG1280	Threonine/homoserine/homoserine lactone efflux protein
Core	group_1507
Core	group_1508	F	COG1611	Nucleotide monophosphate nucleosidase PpnN/YdgH, Lonely Guy (LOG) family
Core	group_1509	O	COG0625	Glutathione S-transferase
Core	group_151	I	COG1024	Enoyl-CoA hydratase/carnithine racemase
Core	group_151	I	COG1250	3-hydroxyacyl-CoA dehydrogenase
Core	group_1510	M	COG1704	Magnetosome formation protein MamQ, lipoprotein antigen LemA family
Core	group_1511	O	COG0625	Glutathione S-transferase
Core	group_1513	S	COG2860	Uncharacterized membrane protein YeiH
Core	group_1514	Q	COG0424	7-methyl-GTP pyrophosphatase and related NTP pyrophosphatases, Maf/HAM1 superfamily
Core	group_1515	G	COG3090	TRAP-type C4-dicarboxylate transport system, small permease component YiaM
Core	group_1516	R	COG1739	Putative translation regulator, IMPACT (imprinted ancient) protein family
Core	group_1517	U	COG4795	Type II secretory pathway, PulJ/GspJ component
Core	group_1518	E	COG1279	Arginine exporter protein ArgO
Core	group_1519	JO	COG3751	Proline 4-hydroxylase (includes Rps23 Pro-64 3,4-dihydroxylase Tpa1), contains SM-20 domain
Core	group_152	T	COG4191	Signal transduction histidine kinase regulating C4-dicarboxylate transport system
Core	group_1520
Core	group_1521	P	COG0605	Superoxide dismutase
Core	group_1522	C	COG0852	NADH:ubiquinone oxidoreductase 27 kD subunit (chain C)
Core	group_1523	O	COG0740	ATP-dependent protease ClpP, protease subunit
Core	group_1524	C	COG1853	FMN reductase RutF, DIM6/NTAB family
Core	group_1525	TK	COG4566	DNA-binding response regulator, FixJ family, consists of REC and HTH domains
Core	group_1526	TK	COG4566	DNA-binding response regulator, FixJ family, consists of REC and HTH domains
Core	group_1527	M	COG3047	Outer membrane protein OmpW
Core	group_1530	H	COG0619	ECF-type transporter transmembrane protein EcfT
Core	group_1531	E	COG1280	Threonine/homoserine/homoserine lactone efflux protein
Core	group_1532	M	COG2885	Outer membrane protein OmpA and related peptidoglycan-associated (lipo)proteins
Core	group_1533	O	COG0625	Glutathione S-transferase
Core	group_1534	R	COG2910	Putative NADH-flavin reductase
Core	group_1536	DI	COG2755	Lysophospholipase L1 or related esterase. Includes spore coat protein LipC/YcsK
Core	group_1537	S	COG3644	Uncharacterized conserved protein, DUF2239 domain
Core	group_1538	MR	COG1778	3-deoxy-D-manno-octulosonate 8-phosphate phosphatase KdsC and related HAD superfamily phosphatases
Core	group_1540	E	COG1280	Threonine/homoserine/homoserine lactone efflux protein
Core	group_1541
Core	group_1542	C	COG0778	Nitroreductase
Core	group_1543	P	COG3230	Heme oxygenase
Core	group_1545	S	COG1238	Uncharacterized membrane protein YqaA, VTT domain
Core	group_1546
Core	group_1547	K	COG1309	DNA-binding protein, AcrR family, includes nucleoid occlusion protein SlmA
Core	group_155	G	COG1082	Sugar phosphate isomerase/epimerase
Core	group_155	ER	COG3185	4-hydroxyphenylpyruvate dioxygenase and related hemolysins
Core	group_1550	R	COG1661	Predicted DNA-binding protein with PD1-like DNA-binding motif, PPC/DUF296 domain
Core	group_1551	R	COG3545	Predicted esterase of the alpha/beta hydrolase fold
Core	group_1554	K	COG1309	DNA-binding protein, AcrR family, includes nucleoid occlusion protein SlmA
Core	group_1555	I	COG2930	Lipid-binding SYLF domain, Ysc84/FYVE family
Core	group_1556
Core	group_1557	G	COG0279	Phosphoheptose isomerase
Core	group_1558	C	COG0778	Nitroreductase
Core	group_1559	R	COG1040	DNA utilization protein ComFC/GntX, contains phosphoribosyltransferase domain
Core	group_156	E	COG0559	Branched-chain amino acid ABC-type transport system, permease component
Core	group_156	E	COG4177	ABC-type branched-chain amino acid transport system, permease component
Core	group_1561	R	COG2353	Polyisoprenoid-binding periplasmic protein YceI
Core	group_1563	HR	COG1335	Nicotinamidase-related amidase
Core	group_1564	K	COG1846	DNA-binding transcriptional regulator, MarR family
Core	group_1565	K	COG1678	Putative transcriptional regulator, AlgH/UPF0301 family
Core	group_1566	J	COG3028	Ribosomal 50S subunit-associated protein YjgA, DUF615 family
Core	group_1567	V	COG0693	Protein/nucleotide deglycase, PfpI/YajL/DJ-1 family (repair of methylglyoxal-glycated proteins and nucleic acids)
Core	group_1569	U	COG3149	Type II secretory pathway, component PulM
Core	group_157	S	COG1289	Uncharacterized membrane protein YccC
Core	group_1571	S	COG2259	Uncharacterized membrane protein YphA, DoxX/SURF4 family
Core	group_1572	F	COG1051	ADP-ribose pyrophosphatase YjhB, NUDIX family
Core	group_1573
Core	group_1574	C	COG3038	Cytochrome b561
Core	group_1575	R	COG4185	Predicted ABC-type ATPase or kinase
Core	group_1576	P	COG1971	Putative Mn2+ efflux pump MntP
Core	group_1577	K	COG1309	DNA-binding protein, AcrR family, includes nucleoid occlusion protein SlmA
Core	group_1578	R	COG4101	Uncharacterized conserved protein, RmlC-like cupin domain
Core	group_158
Core	group_1580	R	COG3153	Predicted N-acetyltransferase YhbS
Core	group_1584	G	COG3090	TRAP-type C4-dicarboxylate transport system, small permease component YiaM
Core	group_1585	EH	COG0512	Anthranilate/para-aminobenzoate synthase component II (glutamine amidotransferase)
Core	group_1586	D	COG2917	Intracellular septation protein A
Core	group_1587	M	COG3034	Murein L,D-transpeptidase YafK
Core	group_1588	MO	COG2825	Periplasmic chaperone for outer membrane proteins, Skp family
Core	group_159	V	COG1132	ABC-type multidrug transport system, ATPase and permease component
Core	group_1591
Core	group_1592	K	COG1396	Transcriptional regulator, contains XRE-family HTH domain
Core	group_1593	O	COG0762	Cytochrome b6 maturation protein CCB3/Ycf19 and related maturases, YggT family
Core	group_1594	O	COG3678	Periplasmic chaperone Spy, Spy/CpxP family
Core	group_1595	Q	COG2050	Acyl-CoA thioesterase PaaI, contains HGG motif
Core	group_1598	K	COG1510	DNA-binding transcriptional regulator GbsR, MarR family
Core	group_1599	R	COG2353	Polyisoprenoid-binding periplasmic protein YceI
Core	group_1601	F	COG0503	Adenine/guanine phosphoribosyltransferase or related PRPP-binding protein
Core	group_1602	VI	COG0386	Thioredoxin/glutathione peroxidase BtuE, reduces lipid peroxides
Core	group_1604	H	COG1268	Biotin transporter BioY
Core	group_1605
Core	group_1606	Q	COG5517	3-phenylpropionate/cinnamic acid dioxygenase, small subunit
Core	group_1607	G	COG3090	TRAP-type C4-dicarboxylate transport system, small permease component YiaM
Core	group_1608	J	COG1534	RNA-binding protein YhbY
Core	group_1609	H	COG0262	Dihydrofolate reductase
Core	group_1609	F	COG0563	Adenylate kinase or related kinase
Core	group_161	G	COG3090	TRAP-type C4-dicarboxylate transport system, small permease component YiaM
Core	group_161	G	COG1593	TRAP-type C4-dicarboxylate transport system, large permease component
Core	group_1610	R	COG1917	Cupin domain protein related to quercetin dioxygenase
Core	group_1612	H	COG2236	Hypoxanthine phosphoribosyltransferase
Core	group_1613	PV	COG0783	DNA-binding ferritin-like protein (oxidative damage protectant)
Core	group_1615	C	COG0712	FoF1-type ATP synthase, delta subunit
Core	group_1616	F	COG0563	Adenylate kinase or related kinase
Core	group_1618	M	COG2913	Outer membrane protein assembly factor BamE, lipoprotein component of the BamABCDE complex
Core	group_1620	K	COG1846	DNA-binding transcriptional regulator, MarR family
Core	group_1624	V	COG0450	Alkyl hydroperoxide reductase subunit AhpC (peroxiredoxin)
Core	group_1625	G	COG3090	TRAP-type C4-dicarboxylate transport system, small permease component YiaM
Core	group_1626	K	COG1595	DNA-directed RNA polymerase specialized sigma subunit, sigma24 family
Core	group_163	K	COG0557	Exoribonuclease R
Core	group_1631	G	COG3090	TRAP-type C4-dicarboxylate transport system, small permease component YiaM
Core	group_1632	M	COG0586	Membrane integrity protein DedA, putative transporter, DedA/Tvp38 family
Core	group_1633	R	COG1917	Cupin domain protein related to quercetin dioxygenase
Core	group_1634
Core	group_1635	NUW	COG2165	Type II secretory pathway, pseudopilin PulG
Core	group_1637	K	COG1595	DNA-directed RNA polymerase specialized sigma subunit, sigma24 family
Core	group_1638	K	COG1595	DNA-directed RNA polymerase specialized sigma subunit, sigma24 family
Core	group_1639	K	COG1595	DNA-directed RNA polymerase specialized sigma subunit, sigma24 family
Core	group_1640	K	COG1846	DNA-binding transcriptional regulator, MarR family
Core	group_1641	K	COG1595	DNA-directed RNA polymerase specialized sigma subunit, sigma24 family
Core	group_1644	R	COG0663	Carbonic anhydrase or acetyltransferase, isoleucine patch superfamily
Core	group_1645	P	COG0607	Rhodanese-related sulfurtransferase
Core	group_1648	G	COG3090	TRAP-type C4-dicarboxylate transport system, small permease component YiaM
Core	group_1649	R	COG0663	Carbonic anhydrase or acetyltransferase, isoleucine patch superfamily
Core	group_165	M	COG1368	Phosphoglycerol transferase MdoB/OpgB, AlkP superfamily
Core	group_1653	C	COG1853	FMN reductase RutF, DIM6/NTAB family
Core	group_1654
Core	group_1655	K	COG1595	DNA-directed RNA polymerase specialized sigma subunit, sigma24 family
Core	group_1656	VT	COG1956	GAF domain-containing protein, putative methionine-R-sulfoxide reductase
Core	group_1657	K	COG1595	DNA-directed RNA polymerase specialized sigma subunit, sigma24 family
Core	group_1658	K	COG1595	DNA-directed RNA polymerase specialized sigma subunit, sigma24 family
Core	group_1659	H	COG0262	Dihydrofolate reductase
Core	group_166	V	COG1132	ABC-type multidrug transport system, ATPase and permease component
Core	group_1660	K	COG1595	DNA-directed RNA polymerase specialized sigma subunit, sigma24 family
Core	group_1661	J	COG0242	Peptide deformylase
Core	group_1662	J	COG0456	Ribosomal protein S18 acetylase RimI and related acetyltransferases
Core	group_1663	K	COG1595	DNA-directed RNA polymerase specialized sigma subunit, sigma24 family
Core	group_1667	G	COG3090	TRAP-type C4-dicarboxylate transport system, small permease component YiaM
Core	group_1668	P	COG0735	Fe2+ or Zn2+ uptake regulation protein Fur/Zur
Core	group_1669	H	COG0054	6,7-dimethyl-8-ribityllumazine synthase (Riboflavin synthase beta chain)
Core	group_1673	V	COG0251	Enamine deaminase RidA, house cleaning of reactive enamine intermediates, YjgF/YER057c/UK114 family
Core	group_1674	K	COG1846	DNA-binding transcriptional regulator, MarR family
Core	group_1675	G	COG3090	TRAP-type C4-dicarboxylate transport system, small permease component YiaM
Core	group_1676	F	COG3613	Nucleoside 2-deoxyribosyltransferase
Core	group_1677	V	COG0251	Enamine deaminase RidA, house cleaning of reactive enamine intermediates, YjgF/YER057c/UK114 family
Core	group_168	T	COG4191	Signal transduction histidine kinase regulating C4-dicarboxylate transport system
Core	group_1682	J	COG2110	O-acetyl-ADP-ribose deacetylase (regulator of RNase III), contains Macro domain
Core	group_1683	M	COG3133	Outer membrane lipoprotein SlyB
Core	group_1684	R	COG3631	Ketosteroid isomerase-related protein
Core	group_1686
Core	group_1687	S	COG3762	Uncharacterized membrane protein
Core	group_169
Core	group_1690	J	COG2606	Cys-tRNA(Pro) deacylase, prolyl-tRNA editing enzyme YbaK/EbsC
Core	group_1691	K	COG1522	DNA-binding transcriptional regulator, Lrp family
Core	group_1692	R	COG1917	Cupin domain protein related to quercetin dioxygenase
Core	group_1693
Core	group_1694	I	COG1607	Acyl-CoA hydrolase
Core	group_1695	G	COG3090	TRAP-type C4-dicarboxylate transport system, small permease component YiaM
Core	group_1697	T	COG3073	RseA, negative regulator of sigma E activity
Core	group_1698	PV	COG0783	DNA-binding ferritin-like protein (oxidative damage protectant)
Core	group_1699	K	COG1522	DNA-binding transcriptional regulator, Lrp family
Core	group_1700	K	COG1595	DNA-directed RNA polymerase specialized sigma subunit, sigma24 family
Core	group_1702	T	COG0394	Protein-tyrosine-phosphatase
Core	group_1703	P	COG1863	Multisubunit Na+/H+ antiporter, MnhE subunit
Core	group_1706	K	COG1846	DNA-binding transcriptional regulator, MarR family
Core	group_1707	K	COG1522	DNA-binding transcriptional regulator, Lrp family
Core	group_1708
Core	group_171	I	COG0318	O-succinylbenzoic acid-CoA ligase MenE or related acyl-CoA synthetase (AMP-forming)
Core	group_1712	K	COG1595	DNA-directed RNA polymerase specialized sigma subunit, sigma24 family
Core	group_1713	U	COG0848	Biopolymer transport protein ExbD
Core	group_1715	K	COG1846	DNA-binding transcriptional regulator, MarR family
Core	group_1716	R	COG4922	Predicted SnoaL-like aldol condensation-catalyzing enzyme
Core	group_172	R	COG1875	Predicted ribonuclease YlaK, contains NYN-type RNase and PhoH-family ATPase domains
Core	group_1720	K	COG2732	Barstar, RNAse (barnase) inhibitor
Core	group_1721	J	COG0456	Ribosomal protein S18 acetylase RimI and related acetyltransferases
Core	group_1722	R	COG0727	Uncharacterized protein YkgJ, contains CxxCxxCC motif
Core	group_1723	O	COG1495	Disulfide bond formation protein DsbB
Core	group_1724
Core	group_1725	K	COG1522	DNA-binding transcriptional regulator, Lrp family
Core	group_1730	C	COG0377	NADH:ubiquinone oxidoreductase 20 kD subunit (chain B) or related Fe-S oxidoreductase
Core	group_1731	Q	COG5517	3-phenylpropionate/cinnamic acid dioxygenase, small subunit
Core	group_1732	X	COG3617	Prophage antirepressor
Core	group_1734	O	COG1047	Peptidyl-prolyl cis-trans isomerase, FKBP type
Core	group_1737
Core	group_1739	F	COG1051	ADP-ribose pyrophosphatase YjhB, NUDIX family
Core	group_174	E	COG4177	ABC-type branched-chain amino acid transport system, permease component
Core	group_174	E	COG0411	ABC-type branched-chain amino acid transport system, ATPase component LivG
Core	group_1741	J	COG0219	tRNA(Leu) C34 or U34 (ribose-2'-O)-methylase TrmL, contains SPOUT domain
Core	group_1742	GT	COG1762	Phosphotransferase system mannitol/fructose-specific IIA domain (Ntr-type)
Core	group_1744	J	COG0456	Ribosomal protein S18 acetylase RimI and related acetyltransferases
Core	group_1745	C	COG0711	FoF1-type ATP synthase, membrane subunit b or b'
Core	group_1746	O	COG1225	Peroxiredoxin
Core	group_1749	T	COG0517	CBS domain
Core	group_1750
Core	group_1751	P	COG2128	Alkylhydroperoxidase family enzyme, contains CxxC motif
Core	group_1752	P	COG2193	Bacterioferritin (cytochrome b1)
Core	group_1758	T	COG0589	Nucleotide-binding universal stress protein, UspA family
Core	group_1759	K	COG1846	DNA-binding transcriptional regulator, MarR family
Core	group_176	O	COG1123	ABC-type glutathione transport system ATPase component, contains duplicated ATPase domain
Core	group_1760	S	COG3737	Uncharacterized protein, contains Mth938-like domain
Core	group_1761
Core	group_1763	FM	COG1286	Colicin V production accessory protein CvpA, regulator of purF expression and biofilm formation
Core	group_1764	S	COG2922	Uncharacterized conserved protein Smg, DUF494 family
Core	group_1767	I	COG0824	Acyl-CoA thioesterase FadM
Core	group_1768	I	COG2030	Acyl-CoA dehydratase PaaZ
Core	group_1769	I	COG3777	Hydroxyacyl-ACP dehydratase HTD2, hotdog domain
Core	group_177	E	COG4177	ABC-type branched-chain amino acid transport system, permease component
Core	group_177	E	COG0411	ABC-type branched-chain amino acid transport system, ATPase component LivG
Core	group_1770	R	COG4319	Ketosteroid isomerase homolog YybH
Core	group_1771	S	COG2707	Uncharacterized membrane protein, DUF441 family
Core	group_1772	K	COG1846	DNA-binding transcriptional regulator, MarR family
Core	group_1773	S	COG5633	Uncharacterized conserved protein YcfL
Core	group_1777	K	COG1846	DNA-binding transcriptional regulator, MarR family
Core	group_1778	O	COG2969	Stringent starvation protein B, binds SsrA peptide
Core	group_1779	S	COG5319	Uncharacterized conserved protein, DUF1178 domain
Core	group_1782	FR	COG0537	Purine nucleoside phosphoramidase/Ap4A hydrolase, histidine triade (HIT) family
Core	group_1783
Core	group_1785	R	COG1765	Uncharacterized OsmC-related protein
Core	group_1786	S	COG5393	Uncharacterized membrane protein YqjE
Core	group_1787	I	COG1607	Acyl-CoA hydrolase
Core	group_1788	S	COG2427	Uncharacterized conserved protein YjgD, DUF1641 family
Core	group_1789	J	COG2867	Ribosome association toxin PasT (RatA) of the RatAB toxin-antitoxin module
Core	group_1791	R	COG3324	Lactoylglutathione lyase-related enzyme, vicinal oxygen chelate (VOC) family
Core	group_1792	V	COG0251	Enamine deaminase RidA, house cleaning of reactive enamine intermediates, YjgF/YER057c/UK114 family
Core	group_1793	C	COG0355	FoF1-type ATP synthase, epsilon subunit
Core	group_1794	K	COG1733	DNA-binding transcriptional regulator, HxlR family
Core	group_1795	L	COG2927	DNA polymerase III, chi subunit
Core	group_1796	S	COG2259	Uncharacterized membrane protein YphA, DoxX/SURF4 family
Core	group_1797	O	COG0071	Small heat shock protein IbpA, HSP20 family
Core	group_1798	V	COG1764	Organic hydroperoxide reductase OsmC/OhrA
Core	group_1799	V	COG4461	Lysozyme inhibitor LprI
Core	group_18	T	COG0784	CheY-like REC (receiver) domain, includes chemotaxis protein CheY and sporulation regulator Spo0F
Core	group_18	T	COG2198	HPt (histidine-containing phosphotransfer) domain
Core	group_18	T	COG0642	Signal transduction histidine kinase
Core	group_180	M	COG0729	Outer membrane translocation and assembly module TamA
Core	group_1800	T	COG2202	PAS domain
Core	group_1804	K	COG1522	DNA-binding transcriptional regulator, Lrp family
Core	group_1805	O	COG1585	Membrane protein implicated in regulation of membrane protease activity
Core	group_1806
Core	group_1809	D	COG1426	Cytoskeletal protein RodZ, contains Xre-like HTH and DUF4115 domains
Core	group_181	E	COG0006	Xaa-Pro aminopeptidase
Core	group_1810	P	COG2346	Truncated hemoglobin YjbI
Core	group_1814	K	COG1396	Transcriptional regulator, contains XRE-family HTH domain
Core	group_1815	S	COG2259	Uncharacterized membrane protein YphA, DoxX/SURF4 family
Core	group_1816	P	COG0607	Rhodanese-related sulfurtransferase
Core	group_1818	K	COG1733	DNA-binding transcriptional regulator, HxlR family
Core	group_182	R	COG3975	Predicted metalloprotease, contains C-terminal PDZ domain
Core	group_1821	H	COG0853	Aspartate 1-decarboxylase
Core	group_1822	S	COG3753	Uncharacterized conserved protein YidB, DUF937 family
Core	group_1823	E	COG3232	5-carboxymethyl-2-hydroxymuconate isomerase
Core	group_1824	T	COG3193	Heme-binding protein HbpS, GlcG/HbpS family
Core	group_1825
Core	group_1826	R	COG1765	Uncharacterized OsmC-related protein
Core	group_1827	S	COG2259	Uncharacterized membrane protein YphA, DoxX/SURF4 family
Core	group_1828
Core	group_183	I	COG1960	Acyl-CoA dehydrogenase related to the alkylation response protein AidB
Core	group_1833	K	COG0789	DNA-binding transcriptional regulator, MerR family
Core	group_1836
Core	group_1839	R	COG1917	Cupin domain protein related to quercetin dioxygenase
Core	group_184	Q	COG4172	ABC-type microcin C transport system, duplicated ATPase component YejF
Core	group_1840	G	COG2893	Phosphotransferase system, mannose/fructose-specific component IIA
Core	group_1841	R	COG3576	Predicted flavin-nucleotide-binding protein, pyridoxine 5'-phosphate oxidase superfamily
Core	group_1842	R	COG1661	Predicted DNA-binding protein with PD1-like DNA-binding motif, PPC/DUF296 domain
Core	group_1845	G	COG0662	Mannose-6-phosphate isomerase, cupin superfamily
Core	group_1846	K	COG0789	DNA-binding transcriptional regulator, MerR family
Core	group_1849	R	COG1765	Uncharacterized OsmC-related protein
Core	group_1850	K	COG1396	Transcriptional regulator, contains XRE-family HTH domain
Core	group_1851	I	COG2246	Putative flippase GtrA (transmembrane translocase of bactoprenol-linked glucose)
Core	group_1852	Q	COG3384	Aromatic ring-opening dioxygenase, catalytic subunit, LigB family
Core	group_1853	O	COG0071	Small heat shock protein IbpA, HSP20 family
Core	group_1854
Core	group_1856	K	COG1733	DNA-binding transcriptional regulator, HxlR family
Core	group_1857	V	COG0251	Enamine deaminase RidA, house cleaning of reactive enamine intermediates, YjgF/YER057c/UK114 family
Core	group_1859	J	COG1188	Ribosomal 50S subunit-recycling heat shock protein, contains S4 domain
Core	group_1860	S	COG3111	Predicted periplasmic protein YdeI with OB-fold, BOF family
Core	group_1861	S	COG3094	Uncharacterized membrane protein SirB2
Core	group_1866	P	COG2372	Copper-binding protein CopC (methionine-rich)
Core	group_1867
Core	group_1868	K	COG0789	DNA-binding transcriptional regulator, MerR family
Core	group_1869	Q	COG3384	Aromatic ring-opening dioxygenase, catalytic subunit, LigB family
Core	group_1876	S	COG4994	Uncharacterized protein CV0675, UCP033623 family
Core	group_1877	R	COG1380	Putative effector of murein hydrolase LrgA, UPF0299 family
Core	group_1879	H	COG1539	Dihydroneopterin aldolase
Core	group_1880	S	COG4259	Uncharacterized conserved protein, DUF4810 domain
Core	group_1884	R	COG3450	Predicted enzyme of the cupin superfamily
Core	group_1887	J	COG4575	Membrane-anchored ribosome-binding protein ElaB, inhibits growth in stationary phase, YqjD/DUF883 family
Core	group_1888	T	COG5126	Ca2+-binding protein, EF-hand superfamily
Core	group_1889
Core	group_189	J	COG1187	Pseudouridylate synthase RsuA, specific for 16S rRNA U516 and 23S rRNA U2605
Core	group_1890	S	COG3171	Uncharacterized conserved protein YggL, DUF469 family
Core	group_1891	R	COG3324	Lactoylglutathione lyase-related enzyme, vicinal oxygen chelate (VOC) family
Core	group_1895	P	COG1320	Multisubunit Na+/H+ antiporter, MnhG subunit
Core	group_19	L	COG0587	DNA polymerase III, alpha subunit
Core	group_190
Core	group_1900	C	COG0838	NADH:ubiquinone oxidoreductase subunit 3 (chain A)
Core	group_1901	P	COG1393	Arsenate reductase or related protein, glutaredoxin family
Core	group_1907	P	COG1324	Divalent cation tolerance protein CutA
Core	group_1908	V	COG0251	Enamine deaminase RidA, house cleaning of reactive enamine intermediates, YjgF/YER057c/UK114 family
Core	group_1909
Core	group_191	I	COG1960	Acyl-CoA dehydrogenase related to the alkylation response protein AidB
Core	group_1910
Core	group_1919	R	COG3526	Predicted selenoprotein, Rdx family
Core	group_192	T	COG2202	PAS domain
Core	group_192	T	COG4191	Signal transduction histidine kinase regulating C4-dicarboxylate transport system
Core	group_1921
Core	group_1925	V	COG2076	Multidrug transporter EmrE and related cation transporters
Core	group_1926	S	COG2149	Uncharacterized membrane protein YidH, DUF202 family
Core	group_1927	S	COG3422	Uncharacterized conserved protein YegP, UPF0339 family
Core	group_1928	P	COG1006	Multisubunit Na+/H+ antiporter, MnhC subunit
Core	group_193	P	COG0659	Sulfate permease or related transporter, MFS superfamily
Core	group_1931	C	COG3125	Heme/copper-type cytochrome/quinol oxidase, subunit 4
Core	group_1932	R	COG3453	Predicted phosphohydrolase, protein tyrosine phosphatase (PTP) superfamily, DUF442 family
Core	group_1933	E	COG0140	Phosphoribosyl-ATP pyrophosphohydrolase
Core	group_1934	Q	COG3384	Aromatic ring-opening dioxygenase, catalytic subunit, LigB family
Core	group_1937	TE	COG0347	Nitrogen regulatory protein PII
Core	group_1938	R	COG1545	Uncharacterized OB-fold protein, contains Zn-ribbon domain
Core	group_1939	TE	COG0347	Nitrogen regulatory protein PII
Core	group_194	V	COG1132	ABC-type multidrug transport system, ATPase and permease component
Core	group_1940
Core	group_1941	J	COG0073	tRNA-binding EMAP/Myf domain
Core	group_1948	S	COG1950	Uncharacterized membrane protein YvlD, DUF360 family
Core	group_1949	O	COG3118	Chaperedoxin CnoX, contains thioredoxin-like and TPR-like domains, YbbN/TrxSC family
Core	group_1951
Core	group_1953	P	COG5569	Periplasmic Cu and Ag efflux protein CusF
Core	group_1954	L	COG0776	Bacterial nucleoid DNA-binding protein IHF-alpha
Core	group_1956	L	COG0776	Bacterial nucleoid DNA-binding protein IHF-alpha
Core	group_1957	MO	COG4783	Outer membrane protein chaperone/metalloprotease BepA/YfgC, contains M48 and TPR domains
Core	group_1958	K	COG0718	DNA-binding nucleoid-associated protein YbaB/EfbC
Core	group_1962	C	COG4231	TPP-dependent indolepyruvate ferredoxin oxidoreductase, alpha subunit
Core	group_1963	S	COG5416	Uncharacterized integral membrane protein YrvD
Core	group_1964	S	COG4744	Uncharacterized conserved protein, DUF2149 domain
Core	group_1965
Core	group_1966	PQ	COG2146	Ferredoxin subunit of nitrite reductase or a ring-hydroxylating dioxygenase
Core	group_1967	K	COG2916	DNA-binding protein H-NS
Core	group_1968
Core	group_1969	K	COG0640	DNA-binding transcriptional regulator, ArsR family
Core	group_1977	J	COG4575	Membrane-anchored ribosome-binding protein ElaB, inhibits growth in stationary phase, YqjD/DUF883 family
Core	group_1979
Core	group_1980
Core	group_1985	S	COG4378	Uncharacterized conserved protein, DUF2325 domain
Core	group_1986	S	COG3162	Uncharacterized membrane protein, DUF485 family
Core	group_1988	S	COG3162	Uncharacterized membrane protein, DUF485 family
Core	group_199	GHR	COG3961	TPP-dependent 2-oxoacid decarboxylase, includes indolepyruvate decarboxylase
Core	group_1990	R	COG4283	Uncharacterized conserved protein DfsB/IRC4, DUF1706 (PF08020) domain
Core	group_1997
Core	group_1998	K	COG0640	DNA-binding transcriptional regulator, ArsR family
Core	group_20	V	COG0841	Multidrug efflux pump subunit AcrB
Core	group_200
Core	group_2003	H	COG2329	Heme-degrading monooxygenase HmoA and related ABM domain proteins
Core	group_2004
Core	group_2006	X	COG3636	Uncharacterized Zn-binding protein, DUF971 domain
Core	group_2007
Core	group_2009
Core	group_201	I	COG3243	Poly-beta-hydroxybutyrate synthase
Core	group_2014	L	COG1722	Exonuclease VII small subunit
Core	group_2015	QR	COG2350	YciI superfamily enzyme, includes 5-CHQ dehydrochlorinase, contains active-site pHis
Core	group_2016
Core	group_2017
Core	group_2018
Core	group_2024
Core	group_2025	J	COG0456	Ribosomal protein S18 acetylase RimI and related acetyltransferases
Core	group_2026	R	COG3042	Putative hemolysin
Core	group_203	T	COG2202	PAS domain
Core	group_203	T	COG5001	Cyclic di-GMP metabolism protein, combines GGDEF and EAL domains with a 6TM membrane domain
Core	group_2033
Core	group_2035
Core	group_2038
Core	group_204	EG	COG0129	Dihydroxyacid dehydratase/phosphogluconate dehydratase
Core	group_2043	P	COG2212	Multisubunit Na+/H+ antiporter, MnhF subunit
Core	group_2049	H	COG2960	Ubiquinone biosynthesis accessory factor UbiK
Core	group_205	P	COG1178	ABC-type Fe3+ transport system, permease component
Core	group_2053	L	COG0776	Bacterial nucleoid DNA-binding protein IHF-alpha
Core	group_2054	PO	COG2924	Fe-S cluster biosynthesis and repair protein YggX
Core	group_2058	T	COG2921	Putative lipoate-binding regulatory protein, UPF0250 family
Core	group_2059	TG	COG1925	HPr or related phosphotransfer protein
Core	group_2060	C	COG1254	Acylphosphatase
Core	group_2061
Core	group_2062
Core	group_2065	KT	COG0271	DNA-binding global transcriptional regulator BolA, affects cell shape, cell division and biofilm formation
Core	group_2066	UW	COG3847	Flp pilus assembly protein, pilin Flp
Core	group_2067
Core	group_207	P	COG0155	Sulfite reductase, beta subunit (hemoprotein)
Core	group_2071	K	COG1396	Transcriptional regulator, contains XRE-family HTH domain
Core	group_2075	O	COG2938	Succinate dehydrogenase flavin-adding protein, antitoxin component of the CptAB toxin-antitoxin module
Core	group_2076
Core	group_2077	K	COG1937	DNA-binding transcriptional regulator, FrmR family
Core	group_208	EH	COG0028	Acetolactate synthase large subunit or other thiamine pyrophosphate-requiring enzyme
Core	group_2080	H	COG2240	Pyridoxal/pyridoxine/pyridoxamine kinase
Core	group_2084
Core	group_2087	T	COG5007	Acid stress protein IbaG/YrbA, BolA-like family
Core	group_209	Q	COG4172	ABC-type microcin C transport system, duplicated ATPase component YejF
Core	group_2092	JHO	COG0425	Sulfur carrier protein TusA (tRNA thiolation, molybdenum cofactor biosynthesis)
Core	group_2093	R	COG2261	Uncharacterized membrane protein YeaQ/YmgE, transglycosylase-associated protein family
Core	group_2098	K	COG1278	Cold shock protein, CspA family
Core	group_210	EH	COG0028	Acetolactate synthase large subunit or other thiamine pyrophosphate-requiring enzyme
Core	group_2102	P	COG2906	Bacterioferritin-associated ferredoxin
Core	group_2112	S	COG3134	Uncharacterized conserved protein YcfJ, contains glycine zipper 2TM domain
Core	group_2113
Core	group_212	GHR	COG3961	TPP-dependent 2-oxoacid decarboxylase, includes indolepyruvate decarboxylase
Core	group_2122
Core	group_2127	S	COG2879	Uncharacterized short protein YbdD, DUF466 family
Core	group_213	C	COG1053	Succinate dehydrogenase/fumarate reductase, flavoprotein subunit
Core	group_2133	J	COG0361	Translation initiation factor IF-1
Core	group_2137	H	COG3585	Molybdopterin-binding protein MopI
Core	group_214	I	COG0318	O-succinylbenzoic acid-CoA ligase MenE or related acyl-CoA synthetase (AMP-forming)
Core	group_2146	P	COG2608	Copper chaperone CopZ
Core	group_2152	S	COG2900	Uncharacterized coiled-coil protein SlyX (sensitive to lysis X)
Core	group_2153	K	COG1278	Cold shock protein, CspA family
Core	group_2154
Core	group_2155	K	COG1278	Cold shock protein, CspA family
Core	group_2157
Core	group_2158	G	COG2814	Predicted arabinose efflux permease AraJ, MFS family
Core	group_216	S	COG3071	Uncharacterized protein HemY, contains HemY_N domain and TPR repeats (unrelated to protoporphyrinogen oxidase HemY)
Core	group_2165
Core	group_2171	P	COG2608	Copper chaperone CopZ
Core	group_2177	R	COG4185	Predicted ABC-type ATPase or kinase
Core	group_2178	J	COG2835	RNA methyltransferase activator Trm112/YbaR
Core	group_2184
Core	group_22	V	COG0841	Multidrug efflux pump subunit AcrB
Core	group_220	C	COG0644	Dehydrogenase (flavoprotein)
Core	group_220	C	COG2440	Ferredoxin-like protein FixX
Core	group_2203
Core	group_2208	P	COG1773	Flavorubredoxin
Core	group_2211
Core	group_2212
Core	group_2214
Core	group_2219
Core	group_222	P	COG1178	ABC-type Fe3+ transport system, permease component
Core	group_2228	K	COG0583	DNA-binding transcriptional regulator, LysR family
Core	group_2229	J	COG1186	Protein chain release factor PrfB
Core	group_224	L	COG0513	Superfamily II DNA and RNA helicase
Core	group_2240	M	COG1538	Outer membrane protein TolC
Core	group_2241	M	COG1538	Outer membrane protein TolC
Core	group_2243
Core	group_2244	PT	COG3712	Periplasmic ferric-dicitrate binding protein FecR, regulates iron transport
Core	group_2245	PT	COG3712	Periplasmic ferric-dicitrate binding protein FecR, regulates iron transport
Core	group_2246	U	COG3504	Type IV secretory pathway, VirB9 components
Core	group_2247	P	COG2807	Cyanate permease
Core	group_2248	R	COG3247	Acid resistance membrane protein HdeD, DUF308 family
Core	group_2249	P	COG4771	Outer membrane receptor for ferrienterochelin and colicins
Core	group_2251	K	COG0789	DNA-binding transcriptional regulator, MerR family
Core	group_2252	S	COG2832	Uncharacterized membrane protein YbaN, DUF454 family
Core	group_2253	HR	COG0596	2-succinyl-6-hydroxy-2,4-cyclohexadiene-1-carboxylate synthase MenH and related esterases, alpha/beta hydrolase fold
Core	group_2254	P	COG1629	Outer membrane receptor protein, Fe transport
Core	group_2255
Core	group_2256	P	COG2897	3-mercaptopyruvate sulfurtransferase SseA, contains two rhodanese domains
Core	group_2258	P	COG0735	Fe2+ or Zn2+ uptake regulation protein Fur/Zur
Core	group_2259	MV	COG0845	Multidrug efflux pump subunit AcrA (membrane-fusion protein)
Core	group_226	P	COG1178	ABC-type Fe3+ transport system, permease component
Core	group_2260	G	COG2814	Predicted arabinose efflux permease AraJ, MFS family
Core	group_2261
Core	group_2262
Core	group_2263	R	COG2081	Predicted flavoprotein YhiN
Core	group_2264	M	COG1538	Outer membrane protein TolC
Core	group_2265
Core	group_2266
Core	group_2267	E	COG0411	ABC-type branched-chain amino acid transport system, ATPase component LivG
Core	group_2268	L	COG5464	Recombination-promoting DNA endonuclease RpnC/YadD
Core	group_2269	P	COG4771	Outer membrane receptor for ferrienterochelin and colicins
Core	group_227	F	COG0504	CTP synthase (UTP-ammonia lyase)
Core	group_2270	K	COG0583	DNA-binding transcriptional regulator, LysR family
Core	group_2271
Core	group_2272	C	COG1622	Heme/copper-type cytochrome/quinol oxidase, subunit 2
Core	group_2273	M	COG1538	Outer membrane protein TolC
Core	group_2275	S	COG4681	Uncharacterized conserved protein YaeQ, suppresses RfaH defect
Core	group_2276	M	COG1538	Outer membrane protein TolC
Core	group_2277	I	COG0183	Acetyl-CoA acetyltransferase
Core	group_2278	C	COG1301	Na+/H+-dicarboxylate symporter
Core	group_2279	O	COG0265	Periplasmic serine protease, S1-C subfamily, contain C-terminal PDZ domain
Core	group_228	C	COG4147	Na+(or H+)/acetate symporter ActP
Core	group_2280	K	COG1846	DNA-binding transcriptional regulator, MarR family
Core	group_2281	G	COG2814	Predicted arabinose efflux permease AraJ, MFS family
Core	group_2282	P	COG0598	Mg2+ and Co2+ transporter CorA
Core	group_2283
Core	group_2284	M	COG2829	Outer membrane phospholipase A
Core	group_2285	K	COG1309	DNA-binding protein, AcrR family, includes nucleoid occlusion protein SlmA
Core	group_2286
Core	group_2288	TK	COG2197	DNA-binding response regulator, NarL/FixJ family, contains REC and HTH domains
Core	group_229	I	COG2272	Carboxylesterase type B
Core	group_2290	V	COG1132	ABC-type multidrug transport system, ATPase and permease component
Core	group_2291
Core	group_2292	M	COG0810	Periplasmic protein TonB, links inner and outer membranes
Core	group_2293	G	COG4975	Glucose uptake protein GlcU
Core	group_2294	K	COG1396	Transcriptional regulator, contains XRE-family HTH domain
Core	group_2295	TK	COG0745	DNA-binding response regulator, OmpR family, contains REC and winged-helix (wHTH) domain
Core	group_2296
Core	group_2297	H	COG0163	Flavin prenyltransferase UbiX
Core	group_2299	U	COG1450	Type II secretory pathway component GspD/PulD (secretin)
Core	group_230	IR	COG2303	Choline dehydrogenase or related flavoprotein
Core	group_2300	K	COG0583	DNA-binding transcriptional regulator, LysR family
Core	group_2301	E	COG0710	3-dehydroquinate dehydratase
Core	group_2301	E	COG0169	Shikimate 5-dehydrogenase
Core	group_2301	JO	COG1670	Protein N-acetyltransferase, RimJ/RimL family
Core	group_2302	P	COG4773	Outer membrane receptor for ferric coprogen and ferric-rhodotorulic acid
Core	group_2303	E	COG0620	Methionine synthase II (cobalamin-independent)
Core	group_2304
Core	group_2306	M	COG3137	Putative salt-induced outer membrane protein YdiY
Core	group_2308
Core	group_2309
Core	group_231	C	COG1053	Succinate dehydrogenase/fumarate reductase, flavoprotein subunit
Core	group_2310	P	COG4771	Outer membrane receptor for ferrienterochelin and colicins
Core	group_2311
Core	group_2312
Core	group_2313	R	COG2320	GrpB domain, predicted nucleotidyltransferase, UPF0157 family
Core	group_2314
Core	group_2315	K	COG0583	DNA-binding transcriptional regulator, LysR family
Core	group_2316	Q	COG1942	Phenylpyruvate tautomerase PptA, 4-oxalocrotonate tautomerase family
Core	group_2317	TK	COG2197	DNA-binding response regulator, NarL/FixJ family, contains REC and HTH domains
Core	group_2318	S	COG3134	Uncharacterized conserved protein YcfJ, contains glycine zipper 2TM domain
Core	group_2319	L	COG1573	Uracil-DNA glycosylase
Core	group_232	I	COG0318	O-succinylbenzoic acid-CoA ligase MenE or related acyl-CoA synthetase (AMP-forming)
Core	group_2320	K	COG1396	Transcriptional regulator, contains XRE-family HTH domain
Core	group_2321	Q	COG0346	Catechol 2,3-dioxygenase or related enzyme, vicinal oxygen chelate (VOC) family
Core	group_2322
Core	group_2323	J	COG0116	23S rRNA G2445 N2-methylase RlmL
Core	group_2326	K	COG0583	DNA-binding transcriptional regulator, LysR family
Core	group_2327	NW	COG3063	Type IV pilus assembly protein PilF/PilW
Core	group_2328	S	COG1357	Uncharacterized conserved protein YjbI, contains pentapeptide repeats
Core	group_2329
Core	group_233	I	COG0318	O-succinylbenzoic acid-CoA ligase MenE or related acyl-CoA synthetase (AMP-forming)
Core	group_2330	R	COG0790	TPR repeat
Core	group_2331	I	COG0688	Phosphatidylserine decarboxylase
Core	group_2332	G	COG2301	Citrate lyase beta subunit
Core	group_2333	K	COG1309	DNA-binding protein, AcrR family, includes nucleoid occlusion protein SlmA
Core	group_2334	K	COG1309	DNA-binding protein, AcrR family, includes nucleoid occlusion protein SlmA
Core	group_2335	M	COG0728	Lipid II flippase MurJ/MviN (peptidoglycan biosynthesis)
Core	group_2336	T	COG1409	3',5'-cyclic AMP phosphodiesterase CpdA
Core	group_2337	K	COG1733	DNA-binding transcriptional regulator, HxlR family
Core	group_2338
Core	group_2339	M	COG2821	Membrane-bound lytic murein transglycosylase
Core	group_2340	NW	COG4970	Type IV pilus assembly protein FimT
Core	group_2341	I	COG0657	Acetyl esterase/lipase
Core	group_2342	K	COG1396	Transcriptional regulator, contains XRE-family HTH domain
Core	group_2343	C	COG3312	FoF1-type ATP synthase accessory protein AtpI
Core	group_2344	L	COG0122	3-methyladenine DNA glycosylase/8-oxoguanine DNA glycosylase
Core	group_2345	E	COG0665	Glycine/D-amino acid oxidase (deaminating)
Core	group_2346	G	COG1638	TRAP-type C4-dicarboxylate transport system, periplasmic component
Core	group_2347	I	COG0688	Phosphatidylserine decarboxylase
Core	group_2348	K	COG1733	DNA-binding transcriptional regulator, HxlR family
Core	group_2350	G	COG2814	Predicted arabinose efflux permease AraJ, MFS family
Core	group_2351	P	COG2375	NADPH-dependent ferric siderophore reductase, contains FAD-binding and SIP domains
Core	group_2354	C	COG3038	Cytochrome b561
Core	group_2355	G	COG2513	2-Methylisocitrate lyase and related enzymes, PEP mutase family
Core	group_2356	P	COG1464	ABC-type metal ion transport system, periplasmic component/surface antigen
Core	group_2358	R	COG4639	Predicted kinase
Core	group_2358	T	COG0639	Diadenosine tetraphosphatase ApaH/serine/threonine protein phosphatase, PP2A family
Core	group_2359	P	COG4606	ABC-type enterochelin transport system, permease component
Core	group_236	C	COG1053	Succinate dehydrogenase/fumarate reductase, flavoprotein subunit
Core	group_2360	K	COG1414	DNA-binding transcriptional regulator, IclR family
Core	group_2361	U	COG1272	Predicted membrane channel-forming protein YqfA, hemolysin III family
Core	group_2362	P	COG1116	ABC-type nitrate/sulfonate/bicarbonate transport system, ATPase component
Core	group_2363	P	COG4771	Outer membrane receptor for ferrienterochelin and colicins
Core	group_2364	S	COG4701	Uncharacterized conserved protein
Core	group_2365	L	COG2852	Very-short-patch-repair endonuclease
Core	group_2366	IR	COG3240	Phospholipase/lecithinase/hemolysin
Core	group_2367	M	COG0438	Glycosyltransferase involved in cell wall bisynthesis
Core	group_2368	M	COG0770	UDP-N-acetylmuramyl pentapeptide synthase
Core	group_2369	I	COG1250	3-hydroxyacyl-CoA dehydrogenase
Core	group_237	EH	COG0028	Acetolactate synthase large subunit or other thiamine pyrophosphate-requiring enzyme
Core	group_2371	G	COG0471	Di- and tricarboxylate antiporter
Core	group_2372	R	COG4134	ABC-type uncharacterized transport system YnjBCD, periplasmic component
Core	group_2373	T	COG1409	3',5'-cyclic AMP phosphodiesterase CpdA
Core	group_2375	TK	COG2197	DNA-binding response regulator, NarL/FixJ family, contains REC and HTH domains
Core	group_2376	M	COG1686	D-alanyl-D-alanine carboxypeptidase
Core	group_2377	ET	COG0834	ABC-type amino acid transport/signal transduction system, periplasmic component/domain
Core	group_2378	K	COG0583	DNA-binding transcriptional regulator, LysR family
Core	group_2379
Core	group_238	I	COG0318	O-succinylbenzoic acid-CoA ligase MenE or related acyl-CoA synthetase (AMP-forming)
Core	group_2380	W	COG2064	Flp pilus assembly protein TadC
Core	group_2381	T	COG1716	Forkhead associated (FHA) domain, binds pSer, pThr, pTyr
Core	group_2381	UW	COG4962	Pilus assembly protein, ATPase of CpaF family
Core	group_2382	M	COG0438	Glycosyltransferase involved in cell wall bisynthesis
Core	group_2383	P	COG0609	ABC-type Fe3+-siderophore transport system, permease component
Core	group_2384	MR	COG4948	L-alanine-DL-glutamate epimerase or related enzyme of enolase superfamily
Core	group_2385	K	COG1309	DNA-binding protein, AcrR family, includes nucleoid occlusion protein SlmA
Core	group_2386	UW	COG4961	Flp pilus assembly protein TadG, includes N-terminal TadE domain
Core	group_2388
Core	group_2389	GM	COG0726	Peptidoglycan/xylan/chitin deacetylase, PgdA/NodB/CDA1 family
Core	group_239	I	COG0318	O-succinylbenzoic acid-CoA ligase MenE or related acyl-CoA synthetase (AMP-forming)
Core	group_2390
Core	group_2391	TR	COG1437	Adenylate cyclase class IV, CYTH domain (includes archaeal enzymes of unknown function)
Core	group_2392	NU	COG1989	Prepilin signal peptidase PulO (type II secretory pathway) or related peptidase
Core	group_2393	G	COG0738	Fucose permease
Core	group_2394	C	COG0431	NAD(P)H-dependent FMN reductase
Core	group_2395	R	COG0488	ATPase components of ABC transporters with duplicated ATPase domains
Core	group_2397	P	COG5455	Periplasmic regulator RcnB of Ni and Co efflux
Core	group_2398
Core	group_2399
Core	group_24	V	COG0841	Multidrug efflux pump subunit AcrB
Core	group_2400	E	COG3232	5-carboxymethyl-2-hydroxymuconate isomerase
Core	group_2402	T	COG0642	Signal transduction histidine kinase
Core	group_2403	E	COG4215	ABC-type arginine transport system, permease component
Core	group_2404	H	COG0111	Phosphoglycerate dehydrogenase or related dehydrogenase
Core	group_2406	E	COG0833	Amino acid permease
Core	group_2407	R	COG3631	Ketosteroid isomerase-related protein
Core	group_2408	T	COG2202	PAS domain
Core	group_2408	HV	COG3236	N-glycosidase YbiA/RibX (riboflavin biosynthesis, damage control), NADAR superfamily
Core	group_2409	I	COG1028	NAD(P)-dependent dehydrogenase, short-chain alcohol dehydrogenase family
Core	group_241	E	COG0069	Glutamate synthase domain 2
Core	group_2410
Core	group_2411	T	COG0784	CheY-like REC (receiver) domain, includes chemotaxis protein CheY and sporulation regulator Spo0F
Core	group_2411	T	COG2198	HPt (histidine-containing phosphotransfer) domain
Core	group_2411	T	COG0642	Signal transduction histidine kinase
Core	group_2412	G	COG0471	Di- and tricarboxylate antiporter
Core	group_2413	S	COG5642	Uncharacterized conserved protein, DUF2384 family
Core	group_2414
Core	group_2416	R	COG1569	Predicted nucleic acid-binding protein, contains PIN domain
Core	group_2417	K	COG1278	Cold shock protein, CspA family
Core	group_2418	C	COG0843	Heme/copper-type cytochrome/quinol oxidase, subunit 1
Core	group_2419	K	COG1309	DNA-binding protein, AcrR family, includes nucleoid occlusion protein SlmA
Core	group_242	CP	COG0651	Formate hydrogenlyase subunit 3/Multisubunit Na+/H+ antiporter, MnhD subunit
Core	group_2420	L	COG5464	Recombination-promoting DNA endonuclease RpnC/YadD
Core	group_2421	J	COG1399	23S rRNA accumulation protein YceD (essential in plants, uncharacterized in bacteria)
Core	group_2422	K	COG1846	DNA-binding transcriptional regulator, MarR family
Core	group_2425	U	COG3031	Type II secretory pathway, component PulC
Core	group_2426	G	COG2814	Predicted arabinose efflux permease AraJ, MFS family
Core	group_2427	H	COG3161	4-hydroxybenzoate synthetase (chorismate-pyruvate lyase)
Core	group_2428
Core	group_2429	K	COG1309	DNA-binding protein, AcrR family, includes nucleoid occlusion protein SlmA
Core	group_243	IR	COG2303	Choline dehydrogenase or related flavoprotein
Core	group_2430	G	COG1638	TRAP-type C4-dicarboxylate transport system, periplasmic component
Core	group_2431
Core	group_2433	H	COG1429	Cobalamin biosynthesis protein CobN, Mg-chelatase
Core	group_2434	O	COG0625	Glutathione S-transferase
Core	group_2435	G	COG1593	TRAP-type C4-dicarboxylate transport system, large permease component
Core	group_2436	R	COG3911	Predicted ATPase
Core	group_2437	V	COG0286	Type I restriction-modification system, DNA methylase subunit
Core	group_2438	P	COG0474	Magnesium-transporting ATPase (P-type)
Core	group_244	T	COG2199	GGDEF domain, diguanylate cyclase (c-di-GMP synthetase) or its enzymatically inactive variants
Core	group_2441	S	COG1289	Uncharacterized membrane protein YccC
Core	group_2442	D	COG3087	Cell division protein FtsN
Core	group_2443	P	COG4771	Outer membrane receptor for ferrienterochelin and colicins
Core	group_2445	R	COG0679	Predicted permease, AEC (auxin efflux carrier) family
Core	group_2446	K	COG0583	DNA-binding transcriptional regulator, LysR family
Core	group_2448	J	COG1738	Queuosine precursor transporter YhhQ, DUF165 family
Core	group_2449	R	COG0679	Predicted permease, AEC (auxin efflux carrier) family
Core	group_245	J	COG4108	Peptide chain release factor RF-3
Core	group_2450	R	COG3209	Uncharacterized conserved protein RhaS, contains 28 RHS repeats
Core	group_2451	J	COG0050	Translation elongation factor EF-Tu, a GTPase
Core	group_2453	Q	COG0346	Catechol 2,3-dioxygenase or related enzyme, vicinal oxygen chelate (VOC) family
Core	group_2454	V	COG3657	Putative component of the toxin-antitoxin plasmid stabilization module
Core	group_2455	K	COG0583	DNA-binding transcriptional regulator, LysR family
Core	group_2456	P	COG4771	Outer membrane receptor for ferrienterochelin and colicins
Core	group_2458	S	COG1430	Uncharacterized conserved membrane protein, UPF0127 family
Core	group_2459	I	COG1028	NAD(P)-dependent dehydrogenase, short-chain alcohol dehydrogenase family
Core	group_246	T	COG2199	GGDEF domain, diguanylate cyclase (c-di-GMP synthetase) or its enzymatically inactive variants
Core	group_2460	O	COG0465	ATP-dependent Zn proteases
Core	group_2460	O	COG0542	ATP-dependent Clp protease, ATP-binding subunit ClpA
Core	group_2461	I	COG0657	Acetyl esterase/lipase
Core	group_2462	S	COG3291	Uncharacterized conserved protein, PKD repeat domain
Core	group_2464	P	COG1629	Outer membrane receptor protein, Fe transport
Core	group_2465	L	COG0419	DNA repair exonuclease SbcCD ATPase subunit
Core	group_2466
Core	group_2467	S	COG3291	Uncharacterized conserved protein, PKD repeat domain
Core	group_2468	G	COG4095	Sugar transporter, SemiSWEET family, contains PQ motif
Core	group_247	D	COG4942	Septal ring factor EnvC, activator of murein hydrolases AmiA and AmiB
Core	group_2470	NUW	COG2804	Type II secretory pathway ATPase GspE/PulE or T4P pilus assembly pathway ATPase PilB
Core	group_2471	M	COG3203	Outer membrane porin OmpC/OmpF/PhoE
Core	group_2471	P	COG0474	Magnesium-transporting ATPase (P-type)
Core	group_2472	EH	COG0028	Acetolactate synthase large subunit or other thiamine pyrophosphate-requiring enzyme
Core	group_2473	C	COG3181	Tripartite-type tricarboxylate transporter, extracytoplasmic receptor component TctC
Core	group_2474	T	COG4191	Signal transduction histidine kinase regulating C4-dicarboxylate transport system
Core	group_2475
Core	group_2476	S	COG1289	Uncharacterized membrane protein YccC
Core	group_2477	L	COG0350	DNA repair enzyme Ada (O6-methylguanine-DNA--protein-cysteine methyltransferase)
Core	group_2478	Q	COG3491	Isopenicillin N synthase and related dioxygenases
Core	group_2479	K	COG1309	DNA-binding protein, AcrR family, includes nucleoid occlusion protein SlmA
Core	group_248	E	COG1231	Monoamine oxidase
Core	group_2481	K	COG1595	DNA-directed RNA polymerase specialized sigma subunit, sigma24 family
Core	group_2482	KT	COG3829	RocR-type transcriptional regulator, contains PAS, AAA-type ATPase, and DNA-binding Fis domains
Core	group_2482	T	COG4252	Extracytoplasmic sensor domain CHASE2 (specificity unknown)
Core	group_2482	T	COG0642	Signal transduction histidine kinase
Core	group_2485	V	COG0251	Enamine deaminase RidA, house cleaning of reactive enamine intermediates, YjgF/YER057c/UK114 family
Core	group_2489	K	COG1802	DNA-binding transcriptional regulator, GntR family
Core	group_249	Q	COG1233	Phytoene dehydrogenase-related protein
Core	group_2490
Core	group_2491
Core	group_2492	T	COG0515	Serine/threonine protein kinase
Core	group_2493	V	COG1566	Multidrug resistance efflux pump EmrA
Core	group_2495	R	COG2940	SET domain-containing protein (function unknown)
Core	group_2496	PT	COG3712	Periplasmic ferric-dicitrate binding protein FecR, regulates iron transport
Core	group_2497	H	COG2226	Ubiquinone/menaquinone biosynthesis C-methylase UbiE/MenG
Core	group_2498	R	COG1432	NYN domain, predicted PIN-related RNAse, tRNA/rRNA maturation
Core	group_2499	P	COG0025	NhaP-type Na+/H+ or K+/H+ antiporter
Core	group_25	C	COG0277	FAD/FMN-containing lactate dehydrogenase/glycolate oxidase
Core	group_25	C	COG0247	Fe-S cluster-containing oxidoreductase, includes glycolate oxidase subunit GlcF
Core	group_250	R	COG0488	ATPase components of ABC transporters with duplicated ATPase domains
Core	group_2500	P	COG1178	ABC-type Fe3+ transport system, permease component
Core	group_2503	J	COG0486	tRNA U34 5-carboxymethylaminomethyl modifying GTPase MnmE/TrmE
Core	group_2504
Core	group_2505	F	COG1146	NAD-dependent dihydropyrimidine dehydrogenase, PreA subunit
Core	group_2506	M	COG1538	Outer membrane protein TolC
Core	group_2507	J	COG0780	NADPH-dependent 7-cyano-7-deazaguanine reductase QueF, C-terminal domain, T-fold superfamily
Core	group_2509	K	COG1959	DNA-binding transcriptional regulator, IscR family
Core	group_251	P	COG0306	Phosphate/sulfate permease
Core	group_2510	TK	COG2197	DNA-binding response regulator, NarL/FixJ family, contains REC and HTH domains
Core	group_2511	K	COG2207	AraC-type DNA-binding domain and AraC-containing proteins
Core	group_2514	V	COG1132	ABC-type multidrug transport system, ATPase and permease component
Core	group_2515	S	COG1289	Uncharacterized membrane protein YccC
Core	group_2516	S	COG3749	Uncharacterized conserved protein, DUF934 family
Core	group_2517
Core	group_2518	E	COG1280	Threonine/homoserine/homoserine lactone efflux protein
Core	group_2519	M	COG1619	Muramoyltetrapeptide carboxypeptidase LdcA (peptidoglycan recycling)
Core	group_2521	P	COG2215	ABC-type nickel/cobalt efflux system, permease component RcnA
Core	group_2522	T	COG0515	Serine/threonine protein kinase
Core	group_2523	C	COG1294	Cytochrome bd-type quinol oxidase, subunit 2
Core	group_2524	C	COG0546	Phosphoglycolate phosphatase, HAD superfamily
Core	group_2525	L	COG5464	Recombination-promoting DNA endonuclease RpnC/YadD
Core	group_2526	K	COG3284	Transcriptional regulator DhaR of acetoin/glycerol metabolism
Core	group_2527	F	COG0167	Dihydroorotate dehydrogenase
Core	group_2528	R	COG4801	Predicted acyltransferase, contains DUF342 domain
Core	group_2529	Q	COG3135	Predicted benzoate:H+ symporter BenE
Core	group_253	C	COG1271	Cytochrome bd-type quinol oxidase, subunit 1
Core	group_2530
Core	group_2531
Core	group_2532	K	COG0583	DNA-binding transcriptional regulator, LysR family
Core	group_2533
Core	group_2534	P	COG1629	Outer membrane receptor protein, Fe transport
Core	group_2535
Core	group_2536	FR	COG0537	Purine nucleoside phosphoramidase/Ap4A hydrolase, histidine triade (HIT) family
Core	group_2537	C	COG0388	Omega-amidase YafV/Nit2, hydrolyzes alpha-ketoglutaramate
Core	group_2537	H	COG0171	NH3-dependent NAD+ synthetase
Core	group_2538	P	COG3639	ABC-type phosphate/phosphonate transport system, permease component
Core	group_2539	TK	COG0745	DNA-binding response regulator, OmpR family, contains REC and winged-helix (wHTH) domain
Core	group_2540	R	COG3218	ABC-type uncharacterized transport system, auxiliary component
Core	group_2546	UW	COG4963	Flp pilus assembly ATPase CpaE/TadZ, contains N-terminal REC/TadZ_N domain
Core	group_2547	P	COG1464	ABC-type metal ion transport system, periplasmic component/surface antigen
Core	group_2548	K	COG1309	DNA-binding protein, AcrR family, includes nucleoid occlusion protein SlmA
Core	group_2549	H	COG0095	Lipoate-protein ligase A
Core	group_2550	T	COG0664	cAMP-binding domain of CRP or a regulatory subunit of cAMP-dependent protein kinases
Core	group_2551	G	COG3090	TRAP-type C4-dicarboxylate transport system, small permease component YiaM
Core	group_2552	K	COG1846	DNA-binding transcriptional regulator, MarR family
Core	group_2553	T	COG0666	Ankyrin repeat
Core	group_2554	I	COG1024	Enoyl-CoA hydratase/carnithine racemase
Core	group_2554	I	COG1250	3-hydroxyacyl-CoA dehydrogenase
Core	group_2557	S	COG2845	Uncharacterized conserved protein, DUF459 domain
Core	group_2558	K	COG1309	DNA-binding protein, AcrR family, includes nucleoid occlusion protein SlmA
Core	group_256	ER	COG1387	Histidinol phosphatase or related hydrolase of the PHP family
Core	group_2560	HR	COG2141	Flavin-dependent oxidoreductase, luciferase family (includes alkanesulfonate monooxygenase SsuD and methylene tetrahydromethanopterin reductase)
Core	group_2561	G	COG2814	Predicted arabinose efflux permease AraJ, MFS family
Core	group_2562	X	COG0675	Transposase
Core	group_2563	HC	COG0543	NAD(P)H-flavin reductase
Core	group_2563	C	COG0633	Ferredoxin
Core	group_2564	E	COG0624	Acetylornithine deacetylase/Succinyl-diaminopimelate desuccinylase or related deacylase
Core	group_2565	Q	COG1535	Isochorismate hydrolase
Core	group_2567
Core	group_2568	R	COG1545	Uncharacterized OB-fold protein, contains Zn-ribbon domain
Core	group_2569	P	COG0715	ABC-type nitrate/sulfonate/bicarbonate transport system, periplasmic component
Core	group_2570	P	COG0598	Mg2+ and Co2+ transporter CorA
Core	group_2571
Core	group_2573	K	COG2207	AraC-type DNA-binding domain and AraC-containing proteins
Core	group_2574	L	COG3663	G:T/U-mismatch repair DNA glycosylase
Core	group_2575	U	COG2831	Hemolysin activation/secretion protein
Core	group_2576	G	COG3839	ABC-type sugar transport system, ATPase component MalK
Core	group_2577
Core	group_258	E	COG0747	ABC-type transport system, periplasmic component
Core	group_2581	T	COG2204	DNA-binding transcriptional response regulator, NtrC family, contains REC, AAA-type ATPase, and a Fis-type DNA-binding domains
Core	group_2582	L	COG1555	DNA uptake protein ComE or related DNA-binding protein
Core	group_2583
Core	group_2585	G	COG0406	Broad specificity phosphatase PhoE
Core	group_2586	P	COG4773	Outer membrane receptor for ferric coprogen and ferric-rhodotorulic acid
Core	group_2587	K	COG1595	DNA-directed RNA polymerase specialized sigma subunit, sigma24 family
Core	group_2588
Core	group_2589	E	COG0410	ABC-type branched-chain amino acid transport system, ATPase component LivF
Core	group_259	J	COG0154	Asp-tRNAAsn/Glu-tRNAGln amidotransferase A subunit or related amidase
Core	group_2590	E	COG4177	ABC-type branched-chain amino acid transport system, permease component
Core	group_2591	C	COG1620	L-lactate permease
Core	group_2592
Core	group_2593	T	COG2199	GGDEF domain, diguanylate cyclase (c-di-GMP synthetase) or its enzymatically inactive variants
Core	group_2594	EP	COG1173	ABC-type dipeptide/oligopeptide/nickel transport system, permease component
Core	group_2595	R	COG1574	Predicted amidohydrolase YtcJ
Core	group_2597	UW	COG4961	Flp pilus assembly protein TadG, includes N-terminal TadE domain
Core	group_2598	UW	COG4964	Flp pilus assembly protein, secretin CpaC
Core	group_2599	S	COG3898	Uncharacterized protein HemY, contains HemY_N domain and TPR repeats (unrelated to HemY-type protoporphyrinogen oxidase)
Core	group_26	V	COG0841	Multidrug efflux pump subunit AcrB
Core	group_260	R	COG1253	Hemolysin-related protein, contains CBS domains, UPF0053 family
Core	group_2601	K	COG1595	DNA-directed RNA polymerase specialized sigma subunit, sigma24 family
Core	group_2603	K	COG1733	DNA-binding transcriptional regulator, HxlR family
Core	group_2604	UW	COG5295	Autotransporter adhesin
Core	group_2604	U	COG3210	Large exoprotein involved in heme utilization or adhesion
Core	group_2605	P	COG4771	Outer membrane receptor for ferrienterochelin and colicins
Core	group_2607	UW	COG5010	Flp pilus assembly protein TadD, contains TPR repeats
Core	group_2608	V	COG2914	Putative antitoxin component PasI (RatB) of the RatAB toxin-antitoxin module, ubiquitin-RnfH superfamily
Core	group_2609	O	COG0705	Membrane-associated serine protease, rhomboid family
Core	group_2609	R	COG3391	DNA-binding beta-propeller fold protein YncE
Core	group_261	C	COG1271	Cytochrome bd-type quinol oxidase, subunit 1
Core	group_2610	D	COG1475	Chromosome segregation protein Spo0J, contains ParB-like nuclease domain
Core	group_2611	K	COG1959	DNA-binding transcriptional regulator, IscR family
Core	group_2612	HC	COG0654	2-polyprenyl-6-methoxyphenol hydroxylase and related FAD-dependent oxidoreductases
Core	group_2613	L	COG0792	Predicted endonuclease distantly related to archaeal Holliday junction resolvase, YraN/UPF0102 family
Core	group_2614	E	COG0119	Isopropylmalate/homocitrate/citramalate synthases
Core	group_2615	C	COG2086	Electron transfer flavoprotein, alpha and beta subunits
Core	group_2616	S	COG1561	Uncharacterized stationary-phase protein YicC, UPF0701 family
Core	group_2617	CR	COG0604	NADPH:quinone reductase or related Zn-dependent oxidoreductase
Core	group_2618
Core	group_2619	P	COG0600	ABC-type nitrate/sulfonate/bicarbonate transport system, permease component
Core	group_262	I	COG0318	O-succinylbenzoic acid-CoA ligase MenE or related acyl-CoA synthetase (AMP-forming)
Core	group_2620	C	COG0431	NAD(P)H-dependent FMN reductase
Core	group_2621	J	COG0456	Ribosomal protein S18 acetylase RimI and related acetyltransferases
Core	group_2624	E	COG1171	Threonine deaminase
Core	group_2625	U	COG0811	Biopolymer transport protein ExbB/TolQ
Core	group_2626
Core	group_2627	Q	COG2931	Ca2+-binding protein, RTX toxin-related
Core	group_2628	C	COG1251	NAD(P)H-nitrite reductase, large subunit
Core	group_2629	M	COG0739	Murein DD-endopeptidase MepM and murein hydrolase activator NlpD, contains LysM domain
Core	group_263	E	COG0747	ABC-type transport system, periplasmic component
Core	group_2630
Core	group_2631	U	COG0342	Preprotein translocase subunit SecD
Core	group_2632
Core	group_2633	R	COG1610	Uncharacterized conserved protein YqeY, may have tRNA amino acid amidase activity
Core	group_2634
Core	group_2635	KX	COG3311	DNA-binding transcriptional regulator AlpA
Core	group_2638	J	COG0024	Methionine aminopeptidase
Core	group_2639	R	COG2081	Predicted flavoprotein YhiN
Core	group_264	I	COG4670	Acyl CoA:acetate/3-ketoacid CoA transferase
Core	group_2640	M	COG3274	Surface polysaccharide O-acyltransferase WecH
Core	group_2641	CR	COG0604	NADPH:quinone reductase or related Zn-dependent oxidoreductase
Core	group_2642
Core	group_2643	GER	COG0697	Permease of the drug/metabolite transporter (DMT) superfamily
Core	group_2645
Core	group_2646	T	COG0394	Protein-tyrosine-phosphatase
Core	group_265	V	COG1132	ABC-type multidrug transport system, ATPase and permease component
Core	group_2650	E	COG1126	ABC-type polar amino acid transport system, ATPase component
Core	group_2654	R	COG2391	Uncharacterized membrane protein YedE/YeeE, contains two sulfur transport domains
Core	group_2657	K	COG1846	DNA-binding transcriptional regulator, MarR family
Core	group_2658
Core	group_2659	S	COG5489	Uncharacterized conserved protein, DUF736 family
Core	group_2660	I	COG3777	Hydroxyacyl-ACP dehydratase HTD2, hotdog domain
Core	group_2662
Core	group_2665	K	COG0583	DNA-binding transcriptional regulator, LysR family
Core	group_2666	R	COG0702	Uncharacterized conserved protein YbjT, contains NAD(P)-binding and DUF2867 domains
Core	group_2667	G	COG2814	Predicted arabinose efflux permease AraJ, MFS family
Core	group_2668	P	COG2217	Cation-transporting P-type ATPase
Core	group_2669	S	COG3012	Uncharacterized conserved protein YchJ, contains N- and C-terminal SEC-C domains
Core	group_267	E	COG4166	ABC-type oligopeptide transport system, periplasmic component
Core	group_2673	K	COG3620	Predicted transcriptional regulator, contains an XRE-type HTH domain (archaeal members contain CBS pair)
Core	group_2674	S	COG5419	Uncharacterized conserved protein, DUF2285 domain
Core	group_2675
Core	group_2676	U	COG0811	Biopolymer transport protein ExbB/TolQ
Core	group_2677	NU	COG1317	Flagellar biosynthesis/type III secretory pathway protein FliH
Core	group_268	EH	COG0147	Anthranilate/para-aminobenzoate synthases component I
Core	group_2680	G	COG2814	Predicted arabinose efflux permease AraJ, MFS family
Core	group_2682
Core	group_2693	DN	COG1192	ParA-like ATPase involved in chromosome/plasmid partitioning or cellulose biosynthesis protein BcsQ
Core	group_2694	M	COG3203	Outer membrane porin OmpC/OmpF/PhoE
Core	group_2695	GEPR	COG0477	MFS family permease, includes anhydromuropeptide permease AmpG
Core	group_2696	T	COG0642	Signal transduction histidine kinase
Core	group_2697	S	COG4125	Uncharacterized membrane protein
Core	group_2698	L	COG0513	Superfamily II DNA and RNA helicase
Core	group_2699	CR	COG0604	NADPH:quinone reductase or related Zn-dependent oxidoreductase
Core	group_27	V	COG0841	Multidrug efflux pump subunit AcrB
Core	group_270	M	COG1538	Outer membrane protein TolC
Core	group_2700	I	COG1012	Acyl-CoA reductase or other NAD-dependent aldehyde dehydrogenase
Core	group_2701	PT	COG0569	Trk/Ktr K+ transport system regulatory component TrkA/KtrA/KtrC, RCK domain
Core	group_2705	K	COG1309	DNA-binding protein, AcrR family, includes nucleoid occlusion protein SlmA
Core	group_2706
Core	group_2707
Core	group_2708	S	COG5652	VanZ-like family protein (function unknown)
Core	group_2709
Core	group_271	FP	COG0369	Flavoprotein (flavin reductase) subunit CysJ of sulfite and N-hydroxylaminopurine reductases
Core	group_2710	R	COG0673	Predicted dehydrogenase
Core	group_2711	I	COG2030	Acyl-CoA dehydratase PaaZ
Core	group_2714	J	COG5271	Midasin, AAA ATPase with vWA domain, involved in ribosome maturation
Core	group_2715
Core	group_2717	P	COG1629	Outer membrane receptor protein, Fe transport
Core	group_2718	O	COG1651	Protein thiol-disulfide isomerase DsbC
Core	group_272	H	COG0043	3-polyprenyl-4-hydroxybenzoate decarboxylase
Core	group_2720	P	COG1840	ABC-type Fe3+ transport system, periplasmic component
Core	group_2721	P	COG4771	Outer membrane receptor for ferrienterochelin and colicins
Core	group_2725	S	COG4890	Predicted outer membrane lipoprotein
Core	group_2726	O	COG2935	Arginyl-tRNA--protein-N-Asp/Glu arginylyltransferase
Core	group_273	G	COG2814	Predicted arabinose efflux permease AraJ, MFS family
Core	group_2732	P	COG1116	ABC-type nitrate/sulfonate/bicarbonate transport system, ATPase component
Core	group_2733	P	COG0600	ABC-type nitrate/sulfonate/bicarbonate transport system, permease component
Core	group_2736	K	COG1595	DNA-directed RNA polymerase specialized sigma subunit, sigma24 family
Core	group_2737	UW	COG4961	Flp pilus assembly protein TadG, includes N-terminal TadE domain
Core	group_2738	R	COG0300	Short-chain dehydrogenase
Core	group_274
Core	group_2741	E	COG0560	Phosphoserine phosphatase
Core	group_2742	S	COG3291	Uncharacterized conserved protein, PKD repeat domain
Core	group_2742	R	COG3391	DNA-binding beta-propeller fold protein YncE
Core	group_2753	R	COG4804	Predicted nuclease of restriction endonuclease-like (RecB) superfamily, DUF1016 family
Core	group_2759	LX	COG0582	Integrase/recombinase, includes phage integrase
Core	group_276	C	COG1014	Pyruvate:ferredoxin oxidoreductase or related 2-oxoacid:ferredoxin oxidoreductase, gamma subunit
Core	group_2786	R	COG0429	Predicted hydrolase of the alpha/beta-hydrolase fold
Core	group_2787	I	COG1024	Enoyl-CoA hydratase/carnithine racemase
Core	group_2789	T	COG1409	3',5'-cyclic AMP phosphodiesterase CpdA
Core	group_2789	G	COG4632	Sugar-P-sugar glycosidase (uncovering enzyme, UCE), NAGPA superfamily
Core	group_279	I	COG1012	Acyl-CoA reductase or other NAD-dependent aldehyde dehydrogenase
Core	group_2791	E	COG1171	Threonine deaminase
Core	group_2793	K	COG1846	DNA-binding transcriptional regulator, MarR family
Core	group_2798	NU	COG1317	Flagellar biosynthesis/type III secretory pathway protein FliH
Core	group_2799	G	COG2814	Predicted arabinose efflux permease AraJ, MFS family
Core	group_280	S	COG5339	Uncharacterized conserved protein YdgA, DUF945 family
Core	group_2803	TK	COG2197	DNA-binding response regulator, NarL/FixJ family, contains REC and HTH domains
Core	group_2805
Core	group_2807	K	COG1309	DNA-binding protein, AcrR family, includes nucleoid occlusion protein SlmA
Core	group_2808	T	COG1352	Methylase of chemotaxis methyl-accepting proteins
Core	group_281	I	COG1012	Acyl-CoA reductase or other NAD-dependent aldehyde dehydrogenase
Core	group_2810	V	COG0841	Multidrug efflux pump subunit AcrB
Core	group_2811	K	COG2207	AraC-type DNA-binding domain and AraC-containing proteins
Core	group_2812	O	COG0760	Peptidyl-prolyl isomerase, parvulin family
Core	group_2813	E	COG4177	ABC-type branched-chain amino acid transport system, permease component
Core	group_2816	Q	COG4569	Acetaldehyde dehydrogenase (acetylating)
Core	group_2817	P	COG1629	Outer membrane receptor protein, Fe transport
Core	group_2819	P	COG0798	Arsenite efflux pump ArsB, ACR3 family
Core	group_282	E	COG0260	Leucyl aminopeptidase
Core	group_2821	Q	COG0346	Catechol 2,3-dioxygenase or related enzyme, vicinal oxygen chelate (VOC) family
Core	group_2824	R	COG0612	Predicted Zn-dependent peptidase, M16 family
Core	group_2825	T	COG0666	Ankyrin repeat
Core	group_2826	T	COG2205	K+-sensing histidine kinase KdpD
Core	group_2828
Core	group_2829	S	COG3291	Uncharacterized conserved protein, PKD repeat domain
Core	group_283	C	COG0427	Propionyl CoA:succinate CoA transferase
Core	group_2831	PH	COG1120	ABC-type cobalamin/Fe3+-siderophores transport system, ATPase component
Core	group_2832	G	COG2814	Predicted arabinose efflux permease AraJ, MFS family
Core	group_2834	M	COG2982	Uncharacterized conserved protein AsmA involved in outer membrane biogenesis
Core	group_2835
Core	group_2838
Core	group_2839	S	COG3291	Uncharacterized conserved protein, PKD repeat domain
Core	group_284	G	COG2814	Predicted arabinose efflux permease AraJ, MFS family
Core	group_2841	I	COG1024	Enoyl-CoA hydratase/carnithine racemase
Core	group_2841	I	COG1250	3-hydroxyacyl-CoA dehydrogenase
Core	group_2842	R	COG4319	Ketosteroid isomerase homolog YybH
Core	group_2843	GER	COG0697	Permease of the drug/metabolite transporter (DMT) superfamily
Core	group_2844	E	COG1280	Threonine/homoserine/homoserine lactone efflux protein
Core	group_2845
Core	group_2846	K	COG1846	DNA-binding transcriptional regulator, MarR family
Core	group_2847	HR	COG0596	2-succinyl-6-hydroxy-2,4-cyclohexadiene-1-carboxylate synthase MenH and related esterases, alpha/beta hydrolase fold
Core	group_2848	S	COG4391	Uncharacterized protein, contains Zn-finger domain
Core	group_2849	R	COG5495	Predicted oxidoreductase, contains short-chain dehydrogenase (SDR) and DUF2520 domains
Core	group_285	I	COG1012	Acyl-CoA reductase or other NAD-dependent aldehyde dehydrogenase
Core	group_2850	V	COG1566	Multidrug resistance efflux pump EmrA
Core	group_2851	R	COG1917	Cupin domain protein related to quercetin dioxygenase
Core	group_2851	K	COG2207	AraC-type DNA-binding domain and AraC-containing proteins
Core	group_2852	P	COG0735	Fe2+ or Zn2+ uptake regulation protein Fur/Zur
Core	group_2853	C	COG2838	Monomeric isocitrate dehydrogenase
Core	group_2854	I	COG0818	Diacylglycerol kinase
Core	group_2855	PT	COG3712	Periplasmic ferric-dicitrate binding protein FecR, regulates iron transport
Core	group_2856	E	COG0559	Branched-chain amino acid ABC-type transport system, permease component
Core	group_2857	M	COG0859	ADP-heptose:LPS heptosyltransferase
Core	group_2859
Core	group_286	KE	COG1167	DNA-binding transcriptional regulator, MocR family, contains an aminotransferase domain
Core	group_2862	U	COG2257	Type III secretion system substrate exporter, FlhB-like
Core	group_2863	P	COG4772	Outer membrane receptor for Fe3+-dicitrate
Core	group_2866	C	COG1042	Acyl-CoA synthetase (NDP forming)
Core	group_2867	K	COG2207	AraC-type DNA-binding domain and AraC-containing proteins
Core	group_2869	S	COG1289	Uncharacterized membrane protein YccC
Core	group_287	KE	COG1167	DNA-binding transcriptional regulator, MocR family, contains an aminotransferase domain
Core	group_2870	S	COG2733	Uncharacterized membrane-anchored protein YjiN, DUF445 family
Core	group_2872	O	COG3118	Chaperedoxin CnoX, contains thioredoxin-like and TPR-like domains, YbbN/TrxSC family
Core	group_2873	R	COG3016	Putative heme-binding protein PhuW
Core	group_2874	H	COG0061	NAD kinase
Core	group_2876
Core	group_2878	I	COG0183	Acetyl-CoA acetyltransferase
Core	group_2879	P	COG1629	Outer membrane receptor protein, Fe transport
Core	group_288	L	COG0389	Nucleotidyltransferase/DNA polymerase DinP involved in DNA repair
Core	group_2880	K	COG1595	DNA-directed RNA polymerase specialized sigma subunit, sigma24 family
Core	group_2882	R	COG1545	Uncharacterized OB-fold protein, contains Zn-ribbon domain
Core	group_2885	HR	COG2141	Flavin-dependent oxidoreductase, luciferase family (includes alkanesulfonate monooxygenase SsuD and methylene tetrahydromethanopterin reductase)
Core	group_2891	N	COG3190	Flagellar biogenesis protein FliO
Core	group_2892	S	COG1289	Uncharacterized membrane protein YccC
Core	group_2893	FV	COG0737	2',3'-cyclic-nucleotide 2'-phosphodiesterase/5'- or 3'-nucleotidase, 5'-nucleotidase family
Core	group_2894	E	COG1506	Dipeptidyl aminopeptidase/acylaminoacyl peptidase
Core	group_2895	T	COG5126	Ca2+-binding protein, EF-hand superfamily
Core	group_2896	O	COG1305	Transglutaminase-like enzyme, putative cysteine protease
Core	group_2897
Core	group_2898	E	COG0559	Branched-chain amino acid ABC-type transport system, permease component
Core	group_29	V	COG0841	Multidrug efflux pump subunit AcrB
Core	group_290	M	COG1538	Outer membrane protein TolC
Core	group_2908	T	COG4585	Signal transduction histidine kinase ComP
Core	group_2909	G	COG2159	5-carboxyvanillate decarboxylase LigW (lignin degradation), amidohydro domain
Core	group_291	KE	COG1167	DNA-binding transcriptional regulator, MocR family, contains an aminotransferase domain
Core	group_2910	R	COG0491	Glyoxylase or a related metal-dependent hydrolase, beta-lactamase superfamily II
Core	group_2912	T	COG0840	Methyl-accepting chemotaxis protein (MCP)
Core	group_2915
Core	group_2916	I	COG4770	Acetyl/propionyl-CoA carboxylase, alpha subunit
Core	group_2917	O	COG3118	Chaperedoxin CnoX, contains thioredoxin-like and TPR-like domains, YbbN/TrxSC family
Core	group_2918
Core	group_2919	E	COG4392	Branched-chain amino acid transport protein
Core	group_292	O	COG0397	Protein adenylyltransferase (AMPylase) SelO/YdiU (selenoprotein O)
Core	group_2921	P	COG3119	Arylsulfatase A or related enzyme, AlkP superfamily
Core	group_2922	E	COG2049	5-oxoprolinase subunit B/Allophanate hydrolase subunit 1
Core	group_2922	E	COG1984	5-oxoprolinase subunit C/Allophanate hydrolase subunit 2
Core	group_2923	R	COG2409	Predicted lipid transporter YdfJ, MMPL/SSD domain, RND superfamily
Core	group_2924	C	COG2871	Na+-transporting NADH:ubiquinone oxidoreductase, subunit NqrF
Core	group_2925	KT	COG3829	RocR-type transcriptional regulator, contains PAS, AAA-type ATPase, and DNA-binding Fis domains
Core	group_2926	M	COG1807	PMT family glycosyltransferase ArnT/Agl22, involved in glycosylation of proteins and lipid IVA
Core	group_2927	C	COG0388	Omega-amidase YafV/Nit2, hydrolyzes alpha-ketoglutaramate
Core	group_2929	I	COG0365	Acyl-coenzyme A synthetase/AMP-(fatty) acid ligase
Core	group_293	O	COG0606	Predicted Mg-chelatase, contains ChlI-like and ATPase domains, YifB family
Core	group_2931	Q	COG0656	Aldo/keto reductase, related to diketogulonate reductase
Core	group_2932	P	COG3025	Inorganic triphosphatase YgiF, contains CYTH and CHAD domains
Core	group_2934	M	COG0668	Small-conductance mechanosensitive channel
Core	group_294	G	COG0471	Di- and tricarboxylate antiporter
Core	group_2940	P	COG1464	ABC-type metal ion transport system, periplasmic component/surface antigen
Core	group_2941	P	COG1464	ABC-type metal ion transport system, periplasmic component/surface antigen
Core	group_2943	P	COG1464	ABC-type metal ion transport system, periplasmic component/surface antigen
Core	group_2945	ET	COG0834	ABC-type amino acid transport/signal transduction system, periplasmic component/domain
Core	group_2946	P	COG3350	Heavy metal-bindng TRASH/YHS domain, predicted Cu/Ag metallochaperone
Core	group_2947
Core	group_2948	R	COG0491	Glyoxylase or a related metal-dependent hydrolase, beta-lactamase superfamily II
Core	group_295	S	COG3898	Uncharacterized protein HemY, contains HemY_N domain and TPR repeats (unrelated to HemY-type protoporphyrinogen oxidase)
Core	group_2950	MO	COG4783	Outer membrane protein chaperone/metalloprotease BepA/YfgC, contains M48 and TPR domains
Core	group_2952	L	COG0433	Archaeal DNA helicase HerA or a related bacterial ATPase, contains HAS-barrel and ATPase domains
Core	group_2953	O	COG0234	Co-chaperonin GroES (HSP10)
Core	group_2954	M	COG1538	Outer membrane protein TolC
Core	group_2955	E	COG0833	Amino acid permease
Core	group_2956
Core	group_2959	O	COG0760	Peptidyl-prolyl isomerase, parvulin family
Core	group_296	C	COG1008	NADH:ubiquinone oxidoreductase subunit 4 (chain M)
Core	group_2961	R	COG2819	Predicted hydrolase of the alpha/beta superfamily
Core	group_2962	E	COG0411	ABC-type branched-chain amino acid transport system, ATPase component LivG
Core	group_2963	F	COG0062	NAD(P)H-hydrate repair enzyme Nnr, NAD(P)H-hydrate epimerase domain
Core	group_2963	F	COG0063	NAD(P)H-hydrate repair enzyme Nnr, NAD(P)H-hydrate dehydratase domain
Core	group_2964	J	COG0254	Ribosomal protein L31
Core	group_2965	L	COG0513	Superfamily II DNA and RNA helicase
Core	group_2967	E	COG0411	ABC-type branched-chain amino acid transport system, ATPase component LivG
Core	group_2969	Q	COG3971	2-keto-4-pentenoate hydratase
Core	group_297	R	COG3333	TctA family transporter
Core	group_2970	S	COG2768	Uncharacterized Fe-S cluster protein
Core	group_2971	I	COG1012	Acyl-CoA reductase or other NAD-dependent aldehyde dehydrogenase
Core	group_2974	Q	COG3971	2-keto-4-pentenoate hydratase
Core	group_2975
Core	group_2976	E	COG1126	ABC-type polar amino acid transport system, ATPase component
Core	group_2977	C	COG0431	NAD(P)H-dependent FMN reductase
Core	group_2978
Core	group_298	FH	COG0775	Nucleoside phosphorylase/nucleosidase, includes 5'-methylthioadenosine/S-adenosylhomocysteine nucleosidase MtnN and futalosine hydrolase MqnB
Core	group_2980	HR	COG2141	Flavin-dependent oxidoreductase, luciferase family (includes alkanesulfonate monooxygenase SsuD and methylene tetrahydromethanopterin reductase)
Core	group_2981	T	COG2199	GGDEF domain, diguanylate cyclase (c-di-GMP synthetase) or its enzymatically inactive variants
Core	group_2982	C	COG0277	FAD/FMN-containing lactate dehydrogenase/glycolate oxidase
Core	group_2983	M	COG0810	Periplasmic protein TonB, links inner and outer membranes
Core	group_2984
Core	group_2985	V	COG0534	Na+-driven multidrug efflux pump, DinF/NorM/MATE family
Core	group_2986	K	COG2901	DNA-binding protein Fis (factor for inversion stimulation)
Core	group_2987	K	COG1414	DNA-binding transcriptional regulator, IclR family
Core	group_2988	T	COG2453	Protein-tyrosine phosphatase
Core	group_2989	I	COG1028	NAD(P)-dependent dehydrogenase, short-chain alcohol dehydrogenase family
Core	group_299	I	COG1012	Acyl-CoA reductase or other NAD-dependent aldehyde dehydrogenase
Core	group_2990	S	COG4676	Uncharacterized conserved protein YfaP, DUF2135 family
Core	group_2991	N	COG4787	Flagellar basal body rod protein FlgF
Core	group_2992	K	COG1802	DNA-binding transcriptional regulator, GntR family
Core	group_2993	E	COG1540	5-oxoprolinase subunit A
Core	group_2996	F	COG0232	dGTP triphosphohydrolase
Core	group_2997	P	COG0730	Sulfite exporter TauE/SafE/YfcA and related permeases, UPF0721 family
Core	group_2999	Q	COG3396	1,2-phenylacetyl-CoA epoxidase, catalytic subunit
Core	group_300	R	COG3333	TctA family transporter
Core	group_3000
Core	group_3001	K	COG1191	DNA-directed RNA polymerase specialized sigma subunit
Core	group_3003	H	COG1541	Phenylacetate-coenzyme A ligase PaaK, adenylate-forming domain family
Core	group_3004	C	COG1252	NADH dehydrogenase, FAD-containing subunit
Core	group_3005	TK	COG0745	DNA-binding response regulator, OmpR family, contains REC and winged-helix (wHTH) domain
Core	group_3006	KJ	COG0217	Transcriptional and/or translational regulatory protein YebC/TACO1
Core	group_3007	T	COG0840	Methyl-accepting chemotaxis protein (MCP)
Core	group_3008
Core	group_3009	S	COG4325	Uncharacterized membrane protein
Core	group_3010	Q	COG1942	Phenylpyruvate tautomerase PptA, 4-oxalocrotonate tautomerase family
Core	group_3012	V	COG0494	8-oxo-dGTP pyrophosphatase MutT and related house-cleaning NTP pyrophosphohydrolases, NUDIX family
Core	group_3013	R	COG1253	Hemolysin-related protein, contains CBS domains, UPF0053 family
Core	group_3014	O	COG0501	Zn-dependent protease with chaperone function
Core	group_3019	I	COG1960	Acyl-CoA dehydrogenase related to the alkylation response protein AidB
Core	group_302	P	COG2072	Predicted flavoprotein CzcO associated with the cation diffusion facilitator CzcD
Core	group_3020	E	COG0410	ABC-type branched-chain amino acid transport system, ATPase component LivF
Core	group_3023	E	COG0410	ABC-type branched-chain amino acid transport system, ATPase component LivF
Core	group_3025	I	COG1960	Acyl-CoA dehydrogenase related to the alkylation response protein AidB
Core	group_3026	T	COG1871	Chemotaxis receptor (MCP) glutamine deamidase CheD
Core	group_3028	S	COG4318	Uncharacterized conserved protein
Core	group_303	R	COG3333	TctA family transporter
Core	group_3030
Core	group_3032	TK	COG2197	DNA-binding response regulator, NarL/FixJ family, contains REC and HTH domains
Core	group_3033	G	COG2814	Predicted arabinose efflux permease AraJ, MFS family
Core	group_3035
Core	group_3038	N	COG2063	Flagellar basal body L-ring protein FlgH
Core	group_3039	E	COG2011	ABC-type methionine transport system, permease component
Core	group_304	I	COG1012	Acyl-CoA reductase or other NAD-dependent aldehyde dehydrogenase
Core	group_3040	G	COG2814	Predicted arabinose efflux permease AraJ, MFS family
Core	group_3041	E	COG0133	Tryptophan synthase beta chain
Core	group_3042	E	COG0765	ABC-type amino acid transport system, permease component
Core	group_3043	K	COG1309	DNA-binding protein, AcrR family, includes nucleoid occlusion protein SlmA
Core	group_3045	E	COG0765	ABC-type amino acid transport system, permease component
Core	group_3046	E	COG1280	Threonine/homoserine/homoserine lactone efflux protein
Core	group_3047	K	COG1309	DNA-binding protein, AcrR family, includes nucleoid occlusion protein SlmA
Core	group_3048	J	COG2850	Ribosomal protein L16 Arg81 hydroxylase, contains JmjC domain
Core	group_3049	G	COG2814	Predicted arabinose efflux permease AraJ, MFS family
Core	group_305	G	COG2814	Predicted arabinose efflux permease AraJ, MFS family
Core	group_3050
Core	group_3051	Q	COG0424	7-methyl-GTP pyrophosphatase and related NTP pyrophosphatases, Maf/HAM1 superfamily
Core	group_3052	E	COG0683	ABC-type branched-chain amino acid transport system, periplasmic component
Core	group_3053	MV	COG0845	Multidrug efflux pump subunit AcrA (membrane-fusion protein)
Core	group_3054	T	COG2201	Chemotaxis response regulator CheB, contains REC and protein-glutamate methylesterase domains
Core	group_3056	R	COG0663	Carbonic anhydrase or acetyltransferase, isoleucine patch superfamily
Core	group_3059	O	COG0625	Glutathione S-transferase
Core	group_3060	E	COG0683	ABC-type branched-chain amino acid transport system, periplasmic component
Core	group_3061	E	COG0683	ABC-type branched-chain amino acid transport system, periplasmic component
Core	group_3062
Core	group_3063	HC	COG0654	2-polyprenyl-6-methoxyphenol hydroxylase and related FAD-dependent oxidoreductases
Core	group_3064	S	COG5510	Predicted small secreted protein
Core	group_3066	U	COG2831	Hemolysin activation/secretion protein
Core	group_3067	O	COG1262	Formylglycine-generating enzyme, required for sulfatase activity, contains SUMF1/FGE domain
Core	group_3069
Core	group_307
Core	group_3071	K	COG1522	DNA-binding transcriptional regulator, Lrp family
Core	group_3072	E	COG0665	Glycine/D-amino acid oxidase (deaminating)
Core	group_3073
Core	group_3074	P	COG2072	Predicted flavoprotein CzcO associated with the cation diffusion facilitator CzcD
Core	group_3075	T	COG3193	Heme-binding protein HbpS, GlcG/HbpS family
Core	group_3077	R	COG1334	Uncharacterized conserved protein, FlaG/YvyC family
Core	group_3078
Core	group_3079	E	COG1247	L-amino acid N-acyltransferase MnaT
Core	group_308	EP	COG1173	ABC-type dipeptide/oligopeptide/nickel transport system, permease component
Core	group_3080	M	COG2913	Outer membrane protein assembly factor BamE, lipoprotein component of the BamABCDE complex
Core	group_3081	Q	COG0123	Acetoin utilization deacetylase AcuC or a related deacetylase
Core	group_3082	K	COG1737	DNA-binding transcriptional regulator, MurR/RpiR family, contains HTH and SIS domains
Core	group_3084	T	COG4191	Signal transduction histidine kinase regulating C4-dicarboxylate transport system
Core	group_3085	TK	COG4566	DNA-binding response regulator, FixJ family, consists of REC and HTH domains
Core	group_3086	G	COG4993	Glucose dehydrogenase, PQQ-dependent
Core	group_3089	J	COG0820	Adenine C2-methylase RlmN of 23S rRNA A2503 and tRNA A37
Core	group_309	I	COG1012	Acyl-CoA reductase or other NAD-dependent aldehyde dehydrogenase
Core	group_3090	P	COG4771	Outer membrane receptor for ferrienterochelin and colicins
Core	group_3092	P	COG4779	ABC-type enterobactin transport system, permease component
Core	group_3093	MR	COG3049	Penicillin V acylase or related amidase, Ntn superfamily
Core	group_3094	M	COG0451	Nucleoside-diphosphate-sugar epimerase
Core	group_3095	M	COG1434	Lipid carrier protein ElyC involved in cell wall biogenesis, DUF218 family
Core	group_3096	C	COG2871	Na+-transporting NADH:ubiquinone oxidoreductase, subunit NqrF
Core	group_3097	N	COG1580	Flagellar basal body-associated protein FliL
Core	group_3099	E	COG1135	ABC-type methionine transport system, ATPase component
Core	group_310	E	COG0747	ABC-type transport system, periplasmic component
Core	group_3100	N	COG1706	Flagellar basal body P-ring protein FlgI
Core	group_3101	T	COG2202	PAS domain
Core	group_3101	T	COG0840	Methyl-accepting chemotaxis protein (MCP)
Core	group_3102	U	COG0848	Biopolymer transport protein ExbD
Core	group_3103	I	COG3000	Sterol desaturase/sphingolipid hydroxylase, fatty acid hydroxylase superfamily
Core	group_3104	K	COG1595	DNA-directed RNA polymerase specialized sigma subunit, sigma24 family
Core	group_3106	H	COG1546	Nicotinamide mononucleotide (NMN) deamidase PncC
Core	group_3107	G	COG4993	Glucose dehydrogenase, PQQ-dependent
Core	group_3108	R	COG3153	Predicted N-acetyltransferase YhbS
Core	group_311	M	COG1807	PMT family glycosyltransferase ArnT/Agl22, involved in glycosylation of proteins and lipid IVA
Core	group_3110	N	COG3144	Flagellar hook-length control protein FliK
Core	group_3111	I	COG1267	Phosphatidylglycerophosphatase A
Core	group_3112	P	COG0609	ABC-type Fe3+-siderophore transport system, permease component
Core	group_3113	G	COG0158	Fructose-1,6-bisphosphatase
Core	group_3116	K	COG3327	DNA-binding transcriptional regulator PaaX (phenylacetic acid degradation)
Core	group_3118	E	COG1296	Predicted branched-chain amino acid permease (azaleucine resistance)
Core	group_3119
Core	group_312	I	COG1012	Acyl-CoA reductase or other NAD-dependent aldehyde dehydrogenase
Core	group_3121	T	COG2365	Protein tyrosine/serine phosphatase Oca4
Core	group_3122	T	COG0835	Chemotaxis signal transduction protein CheW
Core	group_3123	I	COG0332	3-oxoacyl-[acyl-carrier-protein] synthase III
Core	group_3126	NU	COG3418	Flagellar biosynthesis/type III secretory pathway chaperone FlgN
Core	group_3127	R	COG5306	Uncharacterized conserved protein MJ1470, contains DUF2341 domain, predicted component of type IV pili-like system
Core	group_3127	U	COG0811	Biopolymer transport protein ExbB/TolQ
Core	group_3128
Core	group_3129	P	COG1464	ABC-type metal ion transport system, periplasmic component/surface antigen
Core	group_313	I	COG1012	Acyl-CoA reductase or other NAD-dependent aldehyde dehydrogenase
Core	group_3130	PT	COG3712	Periplasmic ferric-dicitrate binding protein FecR, regulates iron transport
Core	group_3132	K	COG1846	DNA-binding transcriptional regulator, MarR family
Core	group_3133
Core	group_3134
Core	group_3135
Core	group_3136	S	COG3169	Uncharacterized membrane protein, DMT/DUF486 family
Core	group_3137	E	COG4177	ABC-type branched-chain amino acid transport system, permease component
Core	group_3138	K	COG1522	DNA-binding transcriptional regulator, Lrp family
Core	group_3141	CR	COG0604	NADPH:quinone reductase or related Zn-dependent oxidoreductase
Core	group_3142	E	COG4177	ABC-type branched-chain amino acid transport system, permease component
Core	group_3142	E	COG0411	ABC-type branched-chain amino acid transport system, ATPase component LivG
Core	group_3143	T	COG1666	Cyclic di-GMP-binding protein YajQ, UPF0234 family
Core	group_3144	UW	COG5010	Flp pilus assembly protein TadD, contains TPR repeats
Core	group_3145	E	COG0665	Glycine/D-amino acid oxidase (deaminating)
Core	group_3146	J	COG1179	tRNA A37 threonylcarbamoyladenosine dehydratase
Core	group_3147	L	COG0178	Excinuclease UvrABC ATPase subunit
Core	group_3148	R	COG2824	Uncharacterized Zn-ribbon-containing protein
Core	group_3149
Core	group_3151	S	COG4700	Uncharacterized conserved protein ECs_4300, contains TPR-like domain
Core	group_3152
Core	group_3155	PT	COG3712	Periplasmic ferric-dicitrate binding protein FecR, regulates iron transport
Core	group_3156	NW	COG3188	Outer membrane usher protein FimD/PapC
Core	group_3157	E	COG3842	ABC-type Fe3+/spermidine/putrescine transport systems, ATPase component
Core	group_3158	G	COG1593	TRAP-type C4-dicarboxylate transport system, large permease component
Core	group_3159	G	COG3836	2-keto-3-deoxy-L-rhamnonate aldolase RhmA
Core	group_316	P	COG0168	Trk-type K+ transport system, membrane component
Core	group_3160	R	COG0673	Predicted dehydrogenase
Core	group_3161	E	COG0559	Branched-chain amino acid ABC-type transport system, permease component
Core	group_3162	C	COG1271	Cytochrome bd-type quinol oxidase, subunit 1
Core	group_3164	J	COG1385	16S rRNA U1498 N3-methylase RsmE
Core	group_3165	J	COG0008	Glutamyl- or glutaminyl-tRNA synthetase
Core	group_3166	P	COG1178	ABC-type Fe3+ transport system, permease component
Core	group_3167	I	COG1028	NAD(P)-dependent dehydrogenase, short-chain alcohol dehydrogenase family
Core	group_3168	K	COG1846	DNA-binding transcriptional regulator, MarR family
Core	group_3169	S	COG3471	Predicted secreted (periplasmic) protein
Core	group_317	G	COG1621	Sucrose-6-phosphate hydrolase SacC, GH32 family
Core	group_3170	E	COG0683	ABC-type branched-chain amino acid transport system, periplasmic component
Core	group_3171	PR	COG4638	Phenylpropionate dioxygenase or related ring-hydroxylating dioxygenase, large terminal subunit
Core	group_3172	E	COG0559	Branched-chain amino acid ABC-type transport system, permease component
Core	group_3173	K	COG1802	DNA-binding transcriptional regulator, GntR family
Core	group_3174	C	COG1053	Succinate dehydrogenase/fumarate reductase, flavoprotein subunit
Core	group_3175	J	COG0442	Prolyl-tRNA synthetase
Core	group_3176	C	COG1053	Succinate dehydrogenase/fumarate reductase, flavoprotein subunit
Core	group_3177	J	COG1825	Ribosomal protein L25 (general stress protein Ctc)
Core	group_3178	DM	COG0768	Cell division protein FtsI, peptidoglycan transpeptidase (Penicillin-binding protein 2)
Core	group_3180	E	COG4177	ABC-type branched-chain amino acid transport system, permease component
Core	group_3183	V	COG2367	Beta-lactamase class A
Core	group_3184	F	COG0518	GMP synthase, glutamine amidotransferase domain
Core	group_3185	K	COG2207	AraC-type DNA-binding domain and AraC-containing proteins
Core	group_3186	C	COG0633	Ferredoxin
Core	group_3187	E	COG0411	ABC-type branched-chain amino acid transport system, ATPase component LivG
Core	group_3188	T	COG0642	Signal transduction histidine kinase
Core	group_3189	E	COG0665	Glycine/D-amino acid oxidase (deaminating)
Core	group_319	ER	COG0493	NADPH-dependent glutamate synthase beta chain or related oxidoreductase
Core	group_3190	E	COG2423	Ornithine cyclodeaminase/archaeal alanine dehydrogenase, mu-crystallin family
Core	group_3191	U	COG0848	Biopolymer transport protein ExbD
Core	group_3193	K	COG0583	DNA-binding transcriptional regulator, LysR family
Core	group_3194	MR	COG1181	D-alanine-D-alanine ligase or related ATP-grasp enzyme
Core	group_3199	C	COG0388	Omega-amidase YafV/Nit2, hydrolyzes alpha-ketoglutaramate
Core	group_32	C	COG1009	Membrane H+-translocase/NADH:ubiquinone oxidoreductase subunit 5 (chain L)/Multisubunit Na+/H+ antiporter, MnhA subunit
Core	group_32	P	COG2111	Multisubunit Na+/H+ antiporter, MnhB subunit
Core	group_320	I	COG1502	Phosphatidylserine/phosphatidylglycerophosphate/cardiolipin synthase
Core	group_3200	V	COG1680	CubicO group peptidase, beta-lactamase class C family
Core	group_3201	D	COG3027	Cell division protein ZapA, inhibits GTPase activity of FtsZ
Core	group_3202	K	COG1522	DNA-binding transcriptional regulator, Lrp family
Core	group_3203
Core	group_3204	G	COG1082	Sugar phosphate isomerase/epimerase
Core	group_3205
Core	group_3206	I	COG3243	Poly-beta-hydroxybutyrate synthase
Core	group_3208	P	COG1840	ABC-type Fe3+ transport system, periplasmic component
Core	group_3208	T	COG0642	Signal transduction histidine kinase
Core	group_3209	E	COG0665	Glycine/D-amino acid oxidase (deaminating)
Core	group_3210	R	COG0488	ATPase components of ABC transporters with duplicated ATPase domains
Core	group_3211	S	COG3803	Uncharacterized conserved protein, DUF924 family
Core	group_3212	V	COG0494	8-oxo-dGTP pyrophosphatase MutT and related house-cleaning NTP pyrophosphohydrolases, NUDIX family
Core	group_3214	P	COG4771	Outer membrane receptor for ferrienterochelin and colicins
Core	group_3215	C	COG0388	Omega-amidase YafV/Nit2, hydrolyzes alpha-ketoglutaramate
Core	group_3216	J	COG3642	tRNA A-37 threonylcarbamoyl transferase component Bud32
Core	group_3217	C	COG1251	NAD(P)H-nitrite reductase, large subunit
Core	group_322	R	COG3800	Predicted transcriptional regulator
Core	group_322	K	COG1396	Transcriptional regulator, contains XRE-family HTH domain
Core	group_3220	E	COG0410	ABC-type branched-chain amino acid transport system, ATPase component LivF
Core	group_3221	TK	COG0745	DNA-binding response regulator, OmpR family, contains REC and winged-helix (wHTH) domain
Core	group_3222	P	COG1840	ABC-type Fe3+ transport system, periplasmic component
Core	group_3223	K	COG1802	DNA-binding transcriptional regulator, GntR family
Core	group_3224	E	COG0169	Shikimate 5-dehydrogenase
Core	group_3225	E	COG4126	Asp/Glu/hydantoin racemase
Core	group_3226	P	COG1629	Outer membrane receptor protein, Fe transport
Core	group_3227	K	COG0583	DNA-binding transcriptional regulator, LysR family
Core	group_3228	E	COG3741	N-formylglutamate amidohydrolase
Core	group_3229	K	COG1414	DNA-binding transcriptional regulator, IclR family
Core	group_323	I	COG1012	Acyl-CoA reductase or other NAD-dependent aldehyde dehydrogenase
Core	group_3230	K	COG1309	DNA-binding protein, AcrR family, includes nucleoid occlusion protein SlmA
Core	group_3231	F	COG0462	Phosphoribosylpyrophosphate synthetase
Core	group_3233	D	COG1589	Cell division septal protein FtsQ
Core	group_3234	O	COG0501	Zn-dependent protease with chaperone function
Core	group_3235	S	COG2363	Uncharacterized membrane protein YgdD, TMEM256/DUF423 family
Core	group_3237	P	COG0288	Carbonic anhydrase
Core	group_3238	TK	COG0745	DNA-binding response regulator, OmpR family, contains REC and winged-helix (wHTH) domain
Core	group_3239	E	COG0559	Branched-chain amino acid ABC-type transport system, permease component
Core	group_3240	HR	COG0596	2-succinyl-6-hydroxy-2,4-cyclohexadiene-1-carboxylate synthase MenH and related esterases, alpha/beta hydrolase fold
Core	group_3241	TK	COG0745	DNA-binding response regulator, OmpR family, contains REC and winged-helix (wHTH) domain
Core	group_3242	EH	COG0147	Anthranilate/para-aminobenzoate synthases component I
Core	group_3243	E	COG0410	ABC-type branched-chain amino acid transport system, ATPase component LivF
Core	group_3244
Core	group_3245	K	COG1595	DNA-directed RNA polymerase specialized sigma subunit, sigma24 family
Core	group_3246	J	COG0009	tRNA A37 threonylcarbamoyladenosine synthetase subunit TsaC/SUA5/YrdC
Core	group_3247	B	COG5531	DNA-binding SWIB/MDM2 domain
Core	group_3249	S	COG3837	Uncharacterized conserved protein, cupin superfamily
Core	group_3249	K	COG1396	Transcriptional regulator, contains XRE-family HTH domain
Core	group_325	I	COG1012	Acyl-CoA reductase or other NAD-dependent aldehyde dehydrogenase
Core	group_3250	Q	COG3653	N-acyl-D-aspartate/D-glutamate deacylase
Core	group_3251	G	COG0126	3-phosphoglycerate kinase
Core	group_3252	M	COG2885	Outer membrane protein OmpA and related peptidoglycan-associated (lipo)proteins
Core	group_3254	K	COG0583	DNA-binding transcriptional regulator, LysR family
Core	group_3255	Q	COG3384	Aromatic ring-opening dioxygenase, catalytic subunit, LigB family
Core	group_3257	E	COG0169	Shikimate 5-dehydrogenase
Core	group_326	G	COG2079	2-methylcitrate dehydratase PrpD
Core	group_3260	C	COG1294	Cytochrome bd-type quinol oxidase, subunit 2
Core	group_3262	K	COG1414	DNA-binding transcriptional regulator, IclR family
Core	group_3263	I	COG1028	NAD(P)-dependent dehydrogenase, short-chain alcohol dehydrogenase family
Core	group_3264	E	COG0683	ABC-type branched-chain amino acid transport system, periplasmic component
Core	group_3265	E	COG0174	Glutamine synthetase
Core	group_3266	I	COG0584	Glycerophosphoryl diester phosphodiesterase
Core	group_3267	G	COG3090	TRAP-type C4-dicarboxylate transport system, small permease component YiaM
Core	group_3269	K	COG1414	DNA-binding transcriptional regulator, IclR family
Core	group_327	G	COG2814	Predicted arabinose efflux permease AraJ, MFS family
Core	group_3270	G	COG1593	TRAP-type C4-dicarboxylate transport system, large permease component
Core	group_3271	F	COG0026	Phosphoribosylaminoimidazole carboxylase (NCAIR synthetase)
Core	group_3272	C	COG1853	FMN reductase RutF, DIM6/NTAB family
Core	group_3273	EH	COG0115	Branched-chain amino acid aminotransferase/4-amino-4-deoxychorismate lyase
Core	group_3274	HR	COG0596	2-succinyl-6-hydroxy-2,4-cyclohexadiene-1-carboxylate synthase MenH and related esterases, alpha/beta hydrolase fold
Core	group_3275	E	COG0411	ABC-type branched-chain amino acid transport system, ATPase component LivG
Core	group_3276	P	COG2822	Iron uptake system EfeUOB, periplasmic (or lipoprotein) component EfeO/EfeM
Core	group_3276	P	COG0672	High-affinity Fe2+/Pb2+ permease
Core	group_3277	T	COG0642	Signal transduction histidine kinase
Core	group_3278	HR	COG0596	2-succinyl-6-hydroxy-2,4-cyclohexadiene-1-carboxylate synthase MenH and related esterases, alpha/beta hydrolase fold
Core	group_3279	G	COG1638	TRAP-type C4-dicarboxylate transport system, periplasmic component
Core	group_328	G	COG2814	Predicted arabinose efflux permease AraJ, MFS family
Core	group_3280	M	COG1136	ABC-type lipoprotein export system, ATPase component
Core	group_3280	V	COG0577	ABC-type antimicrobial peptide transport system, permease component
Core	group_3281	E	COG0683	ABC-type branched-chain amino acid transport system, periplasmic component
Core	group_3283	R	COG1288	Predicted membrane transporter YfcC, affects glyoxylate shunt
Core	group_3284	C	COG0277	FAD/FMN-containing lactate dehydrogenase/glycolate oxidase
Core	group_3285	F	COG0152	Phosphoribosylaminoimidazole-succinocarboxamide synthase
Core	group_3286	P	COG3703	Gamma-glutamylcyclotransferase ChaC2 (glutathione degradation)
Core	group_3288	G	COG2814	Predicted arabinose efflux permease AraJ, MFS family
Core	group_3289	E	COG0531	Serine transporter YbeC, amino acid:H+ symporter family
Core	group_329	J	COG0154	Asp-tRNAAsn/Glu-tRNAGln amidotransferase A subunit or related amidase
Core	group_3292	S	COG3671	Uncharacterized membrane protein
Core	group_3293	G	COG1109	Phosphomannomutase
Core	group_3294	O	COG0330	Regulator of protease activity HflC, stomatin/prohibitin superfamily
Core	group_3296	G	COG1638	TRAP-type C4-dicarboxylate transport system, periplasmic component
Core	group_3297	E	COG1114	Branched-chain amino acid permease
Core	group_3298	S	COG3189	Uncharacterized conserved protein YeaO, DUF488 family
Core	group_3299	E	COG0410	ABC-type branched-chain amino acid transport system, ATPase component LivF
Core	group_33	J	COG0525	Valyl-tRNA synthetase
Core	group_3300	K	COG1396	Transcriptional regulator, contains XRE-family HTH domain
Core	group_3302	P	COG1629	Outer membrane receptor protein, Fe transport
Core	group_3303	E	COG4177	ABC-type branched-chain amino acid transport system, permease component
Core	group_3304
Core	group_3306	MV	COG0845	Multidrug efflux pump subunit AcrA (membrane-fusion protein)
Core	group_331	KE	COG1167	DNA-binding transcriptional regulator, MocR family, contains an aminotransferase domain
Core	group_332	I	COG1012	Acyl-CoA reductase or other NAD-dependent aldehyde dehydrogenase
Core	group_333	P	COG0753	Catalase
Core	group_334	S	COG3014	Uncharacterized conserved protein
Core	group_335	T	COG5002	Sensor histidine kinase WalK
Core	group_336	T	COG4564	Signal transduction histidine kinase
Core	group_337	E	COG0591	Na+/proline symporter
Core	group_338	E	COG0531	Serine transporter YbeC, amino acid:H+ symporter family
Core	group_339	G	COG2814	Predicted arabinose efflux permease AraJ, MFS family
Core	group_34	T	COG0515	Serine/threonine protein kinase
Core	group_340	I	COG0365	Acyl-coenzyme A synthetase/AMP-(fatty) acid ligase
Core	group_342	KE	COG1167	DNA-binding transcriptional regulator, MocR family, contains an aminotransferase domain
Core	group_343	O	COG0760	Peptidyl-prolyl isomerase, parvulin family
Core	group_344	O	COG0793	C-terminal processing protease CtpA/Prc, contains a PDZ domain
Core	group_345	C	COG1271	Cytochrome bd-type quinol oxidase, subunit 1
Core	group_346	PR	COG4638	Phenylpropionate dioxygenase or related ring-hydroxylating dioxygenase, large terminal subunit
Core	group_347	O	COG0265	Periplasmic serine protease, S1-C subfamily, contain C-terminal PDZ domain
Core	group_348	R	COG2959	Proteobacterial HemX domain, involved in 2-ketogluconate production (unrelated to B. subtilis HemX, COG0755, no evidence of involvement in heme biosynthesis)
Core	group_35	T	COG2206	HD-GYP domain, c-di-GMP phosphodiesterase class II (or its inactivated variant)
Core	group_350	T	COG2204	DNA-binding transcriptional response regulator, NtrC family, contains REC, AAA-type ATPase, and a Fis-type DNA-binding domains
Core	group_351	C	COG1249	Dihydrolipoamide dehydrogenase (E3) component of pyruvate/2-oxoglutarate dehydrogenase complex or glutathione oxidoreductase
Core	group_352	I	COG2031	Short chain fatty acids transporter
Core	group_354	E	COG1113	L-asparagine transporter or related permease
Core	group_356	E	COG0665	Glycine/D-amino acid oxidase (deaminating)
[truncated: 2,333 more rows]

## Sheet: Table S2
Table S2 Number of genes in each COG category annotated for the core and accessory genes
Category	Number	genome
A	1	Core
B	1	Core
C	144	Core
D	28	Core
E	291	Core
F	55	Core
G	149	Core
H	98	Core
I	161	Core
J	204	Core
K	226	Core
L	99	Core
M	156	Core
N	31	Core
O	97	Core
P	186	Core
Q	71	Core
R	147	Core
S	97	Core
T	91	Core
U	37	Core
V	51	Core
W	2	Core
X	4	Core
Ambiguous	350	Core
Unclassified	196	Core
C	11	Accessory
D	9	Accessory
E	16	Accessory
F	4	Accessory
G	40	Accessory
H	8	Accessory
I	20	Accessory
J	9	Accessory
K	96	Accessory
L	66	Accessory
M	46	Accessory
N	6	Accessory
O	11	Accessory
P	34	Accessory
Q	16	Accessory
R	46	Accessory
S	47	Accessory
T	10	Accessory
U	48	Accessory
V	73	Accessory
W	1	Accessory
X	80	Accessory
Ambiguous	101	Accessory
Unclassified	426	Accessory

## Sheet: Table S3
Table S3 List of genes differentially present in isolates of sloths and humans including annotation of sloths and humans including annotation
Host	OG-panaroo	Locus_tag*	Protein ID	protein annotation	COG Category	COG	VFDB
Sloth	group_3350	M2357_RS16745	WP_253393121.1	hypothetical protein	Unclassified	Unclassified	-
Sloth	group_3354	M2357_RS16740	WP_253393123.1	replication initiator protein A	X	COG5534	-
Sloth	group_3355	M2357_RS16735	WP_253393125.1	BrnA antitoxin family protein	S	COG3514	-
Sloth	group_3352	M2357_RS16730	WP_253393127.1	BrnT family toxin	S	COG2929	-
Sloth	group_3353	M2357_RS16720	WP_253602403.1	hypothetical protein	Unclassified	Unclassified	-
Sloth	group_3357	M2357_RS16715	WP_253393117.1	conjugal transfer protein TraD	Unclassified	Unclassified	-
Sloth	group_3351	M2357_RS16710	WP_264623394.1	MobA/MobL family protein	L	COG0507	-
Sloth	group_3319	M2357_RS16700	WP_253393141.1	type II toxin-antitoxin system ParD family antitoxin	K	COG3609	-
Sloth	group_3312	M2357_RS16695	WP_253393142.1	type II toxin-antitoxin system RelE/ParE family toxin	X	COG3668	-
Sloth	group_3309	M2357_RS16690	WP_253393143.1	hypothetical protein	Unclassified	Unclassified	-
Sloth	group_3318	M2357_RS16680	WP_253393145.1	YadA-like family protein	UW	COG5295	-
Sloth	group_3315	M2357_RS16675	pseudo	type II toxin-antitoxin system RelE/ParE family toxin	X	COG4679	-
Sloth	group_3327	M2357_RS16670	WP_253393003.1	hypothetical protein	X	COG3636	-
Sloth	group_3322	M2357_RS16665	WP_253393002.1	hypothetical protein	Unclassified	Unclassified	-
Sloth	group_3324	M2357_RS16660	WP_253393001.1	type IV secretion system protein	U	COG3704	-
Sloth	group_3308	M2357_RS16655	WP_253393000.1	EexN family lipoprotein	Unclassified	Unclassified	-
Sloth	group_3313	M2357_RS16650	WP_014125917.1	hypothetical protein	Unclassified	Unclassified	-
Sloth	virB5	M2357_RS16645	WP_253602026.1	P-type DNA transfer protein VirB5	Unclassified	Unclassified	-
Sloth	group_3331	M2357_RS16610	WP_253597460.1	ParA family partition ATPase	DN	COG1192	-
Sloth	group_3316	M2357_RS16605	WP_014125926.1	plasmid partition protein ParG	Unclassified	Unclassified	-
Sloth	group_3325	M2357_RS16600	WP_253392987.1	hypothetical protein	Unclassified	Unclassified	-
Sloth	group_3329	M2357_RS16595	WP_253392985.1	hypothetical protein	Unclassified	Unclassified	-
Sloth	group_3320	M2357_RS16590	WP_147095522.1	recombinase family protein	L	COG1961	-
Sloth	group_3326	M2357_RS16585	WP_147095514.1	hypothetical protein	Unclassified	Unclassified	-
Sloth	group_3311	M2357_RS16580	WP_063599785.1	hypothetical protein	Unclassified	Unclassified	-
Sloth	group_3314	M2357_RS16575	WP_253602024.1	type II toxin-antitoxin system RelE/ParE family toxin	X	COG3668	-
Sloth	group_3332	M2357_RS16570	WP_044466239.1	hypothetical protein	Unclassified	Unclassified	-
Sloth	group_3310	M2357_RS16565	WP_253602398.1	replication protein RepA	Unclassified	Unclassified	-
Sloth	group_1121	M2357_RS16535	WP_253597337.1	phosphoadenosine phosphosulfate reductase family protein	EH	COG0175	-
Sloth	group_16	M2357_RS16530	WP_253602389.1	ATP-binding protein	Unclassified	Unclassified	-
Sloth	group_2238	M2357_RS16525	WP_253600766.1	DUF4007 family protein	Unclassified	Unclassified	-
Sloth	group_1855	M2357_RS16515	WP_253597328.1	hypothetical protein	Unclassified	Unclassified	-
Sloth	group_2172	M2357_RS16510	WP_109088958.1	AlpA family phage regulatory protein	KX	COG3311	-
Sloth	group_1978	M2357_RS15390	WP_253602379.1	SMR family transporter	V	COG2076	-
Sloth	group_1989	M2357_RS15385	WP_253595648.1	SMR family transporter	V	COG2076	-
Sloth	cas2e	M2357_RS13470	WP_253102530.1	type I-E CRISPR-associated endoribonuclease Cas2e	V	COG1343	-
Sloth	cas1e	M2357_RS13465	WP_264622975.1	type I-E CRISPR-associated endonuclease Cas1e	V	COG1518	-
Sloth	cas6e	M2357_RS13460	WP_253596330.1	type I-E CRISPR-associated protein Cas6/Cse3/CasE	V	COG5551	-
Sloth	cas5e	M2357_RS13455	WP_253102536.1	type I-E CRISPR-associated protein Cas5/CasD	V	COG1688	-
Sloth	cas7e	M2357_RS13450	WP_253102538.1	type I-E CRISPR-associated protein Cas7/Cse4/CasC	V	COG5934	-
Sloth	casB	M2357_RS13445	WP_253596334.1	type I-E CRISPR-associated protein Cse2/CasB	V	COG5949	-
Sloth	casA	M2357_RS13440	WP_253596338.1	type I-E CRISPR-associated protein Cse1/CasA	V	COG5942	-
Sloth	cas3	M2357_RS13435	WP_253102544.1	CRISPR-associated helicase Cas3'	V	COG1203	-
Sloth	group_1619	M2357_RS13430	WP_253596346.1	flavin reductase family protein	C	COG1853	-
Sloth	group_2653	M2357_RS12725	WP_253602289.1	sugar transferase	M	COG2148	-
Sloth	group_1503	M2357_RS12720	WP_253600536.1	acetyltransferase	M	COG1043	-
Sloth	group_468	M2357_RS11325	WP_253597469.1	antiviral reverse transcriptase Drt3a	X	COG3344	-
Sloth	group_2008	M2357_RS10945	WP_253595803.1	hypothetical protein	Unclassified	Unclassified	-
Sloth	group_1740	M2357_RS09955	WP_253595896.1	prepilin peptidase	OT	COG4960	-
Sloth	group_2195	M2357_RS09950	WP_253595898.1	Flp family type IVb pilin	UW	COG3847	-
Sloth	group_2183	M2357_RS09650	WP_253596000.1	hypothetical protein	Unclassified	Unclassified	-
Sloth	mhpT	M2357_RS09640	WP_253602212.1	3-(3-hydroxy-phenyl)propionate transporter MhpT	G	COG2814	-
Sloth	group_2463	M2357_RS09635	WP_253602211.1	indolepyruvate ferredoxin oxidoreductase family protein	C	COG1014	-
Sloth	group_2237	M2357_RS09630	WP_253600401.1	AraC family transcriptional regulator	K	COG2207	-
Sloth	group_2034	M2357_RS09625	WP_253595956.1	hypothetical protein	Unclassified	Unclassified	-
Sloth	group_2324	M2357_RS09610	WP_264623004.1	alpha-hydroxy acid oxidase	CIR	COG1304	-
Sloth	group_508	M2357_RS09605	WP_319800951.1	CaiB/BaiF CoA-transferase family protein	I	COG1804	-
Sloth	group_1238	M2357_RS09600	WP_253595959.1	enoyl-CoA hydratase-related protein	I	COG1024	-
Sloth	group_885	M2357_RS09595	WP_253595961.1	LysR substrate-binding domain-containing protein	K	COG0583	-
Sloth	group_495	M2357_RS09590	WP_253602210.1	MFS transporter	G	COG2271	-
Sloth	group_1643	M2357_RS09585	WP_253595965.1	gamma carbonic anhydrase family protein	R	COG0663	-
Sloth	group_1078	M2357_RS07635	WP_253595575.1	helicase RepA family protein	L	COG3598	-
Sloth	group_1365	M2357_RS07630	WP_253595745.1	ABC transporter ATPase	Unclassified	Unclassified	-
Sloth	group_2091	M2357_RS07625	WP_253595576.1	hypothetical protein	Unclassified	Unclassified	-
Sloth	group_2287	M2357_RS07580	WP_253602311.1	hypothetical protein	L	COG1961	-
Sloth	group_252	M2357_RS07575	WP_253602312.1	antiviral reverse transcriptase Drt4	X	COG3344	-
Sloth	group_2875	M2357_RS06240	WP_253600488.1	hypothetical protein	Unclassified	Unclassified	-
Sloth	group_3044	M2357_RS06200	WP_253100852.1	STY4528 family pathogenicity island replication protein	Unclassified	Unclassified	-
Sloth	group_2860	M2357_RS06195	WP_253101004.1	integrase domain-containing protein	L	COG4973	-
Sloth	group_2902	M2357_RS06190	WP_253100855.1	hypothetical protein	Unclassified	Unclassified	-
Sloth	group_3114	M2357_RS06185	WP_253596866.1	hypothetical protein	Unclassified	Unclassified	-
Sloth	group_2837	M2357_RS06180	WP_253100861.1	PIN domain-containing protein	V	COG1848	-
Sloth	group_3057	M2357_RS06175	WP_253100864.1	response regulator transcription factor	TK	COG2197	-
Sloth	group_3029	M2357_RS06170	pseudo	tyrosine-type recombinase/integrase	LX	COG0582	-
Sloth	group_387	M2357_RS05660	WP_253597349.1	hypothetical protein	LX	COG0582	-
Sloth	group_2207	M2357_RS00075	WP_253595344.1	hypothetical protein	Unclassified	Unclassified	-
Human	group_1896	EHF36_RS17715	WP_068369787.1	hypothetical protein	P	COG0659	-
Human	group_2230	EHF36_RS17710	pseudo	SulP family inorganic anion transporter	P	COG0659	-
Human	group_2579	EHF36_RS17440	WP_167731917.1	hypothetical protein			-
Human	group_829	EHF36_RS14280	WP_068367753.1	ABC transporter permease	EP	COG0601	-
Human	group_887	EHF36_RS14275	WP_083969354.1	ABC transporter permease	EP	COG1173	-
Human	group_197	EHF36_RS14270	WP_205704120.1	ABC transporter ATP-binding protein	O	COG1123	-
Human	group_196	EHF36_RS14265	WP_068366937.1	ABC transporter substrate-binding protein	E	COG0747	-
Human	group_2325	EHF36_RS14255	WP_134838813.1	GNAT family N-acetyltransferase	R	COG4552	-
Human	group_510	EHF36_RS14250	WP_068366932.1	acyl-CoA dehydrogenase family protein	I	COG1960	-
Human	group_613	EHF36_RS14245	WP_068366930.1	LLM class flavin-dependent oxidoreductase	HR	COG2141	-
Human	group_349	EHF36_RS14240	WP_134838812.1	LLM class flavin-dependent oxidoreductase	HR	COG2141	-
Human	group_525	EHF36_RS14235	WP_134838811.1	acyl-CoA dehydrogenase family protein	I	COG1960	-
Human	group_314	EHF36_RS14230	WP_134838810.1	NtaA/DmoA family FMN-dependent monooxygenase	HR	COG2141	-
Human	group_217	EHF36_RS14225	WP_068366922.1	ABC transporter ATP-binding protein	O	COG1123	-
Human	group_1132	EHF36_RS14220	WP_068366920.1	ABC transporter permease	EP	COG1173	-
Human	group_746	EHF36_RS14215	WP_083969352.1	ABC transporter permease	EP	COG0601	-
Human	group_234	EHF36_RS14210	WP_205704119.1	ABC transporter substrate-binding protein	E	COG0747	-
Human	group_1628	EHF36_RS12770	WP_068366323.1	TRAP transporter small permease	G	COG3090	-
Human	group_474	EHF36_RS12765	WP_130486674.1	TRAP transporter large permease subunit	G	COG1593	-
Human	group_1405	EHF36_RS12760	WP_134838735.1	GntR family transcriptional regulator	K	COG1802	-
Human	group_992	EHF36_RS12755	WP_134838734.1	fumarylacetoacetate hydrolase family protein	Q	COG0179	-
Human	group_1834	EHF36_RS12750	WP_068366311.1	cupin domain-containing protein	T	COG3806	-
Human	group_719	EHF36_RS12745	WP_130486677.1	TRAP transporter substrate-binding protein	G	COG1638	-
Human	group_1313	EHF36_RS12740	WP_134838733.1	SDR family NAD(P)-dependent oxidoreductase	I	COG1028	-
Human	group_1226	EHF36_RS12735	WP_134838732.1	SDR family oxidoreductase	I	COG1028	-
Human	group_1247	EHF36_RS12730	WP_068367642.1	SDR family NAD(P)-dependent oxidoreductase	I	COG1028	-
Human	group_2000	EHF36_RS12725	WP_068366303.1	Dabb family protein	Unclassified	Unclassified	-
Human	group_407	EHF36_RS12720	WP_068366299.1	DUF1329 domain-containing protein	UW	COG5010	-
Human	group_235	EHF36_RS12715	WP_134838731.1	DUF1302 domain-containing protein	Unclassified	Unclassified	-
Human	group_620	EHF36_RS12710	WP_130486683.1	helix-turn-helix transcriptional regulator	K	COG2771	-
Human	group_2257	EHF36_RS12705	WP_167731900.1	YCF48-related protein	R	COG4447	-
Human	group_68	EHF36_RS12700	WP_134838729.1	MMPL family transporter	R	COG1033	-
Human	group_815	EHF36_RS12695	WP_068366289.1	hypothetical protein	Q	COG3384	-
Human	group_595	EHF36_RS12690	WP_240733247.1	NAD(P)/FAD-dependent oxidoreductase	HC	COG0654	-
Human	group_1065	EHF36_RS12685	WP_130486686.1	alpha/beta hydrolase	I	COG0657	-
Human	group_2103	EHF36_RS09590	WP_068370073.1	hypothetical protein	K	COG0640	-
Human	group_2447	EHF36_RS09585	WP_068369785.1	FAD/NAD(P)-binding oxidoreductase	C	COG1252	-
Human	group_1893	EHF36_RS09580	WP_068369784.1	DUF5368 domain-containing protein	Unclassified	Unclassified	-
Human	group_1874	EHF36_RS09575	WP_068369781.1	carboxymuconolactone decarboxylase family protein	R	COG0599	-
Human	group_1881	EHF36_RS09570	WP_068369780.1	DsrE family protein	R	COG2044	-
Human	group_2734	EHF36_RS09465	WP_068369733.1	sugar transferase	M	COG2148	wcaJ gene capsular
Human	group_2502	EHF36_RS09390	WP_165390053.1	polysaccharide biosynthesis/export family protein	M	COG1596	-
Human	group_2722	EHF36_RS09385	WP_134838467.1	polysaccharide biosynthesis tyrosine autokinase	D	COG0489	-
Human	group_650	EHF36_RS08155	WP_068372536.1	ABC transporter ATP-binding protein	E	COG3842	-
Human	group_627	EHF36_RS08150	WP_134838397.1	extracellular solute-binding protein	R	COG4134	-
Human	group_1117	EHF36_RS08145	WP_193755147.1	ABC transporter permease subunit	E	COG1176	-
Human	group_1155	EHF36_RS08140	WP_068367875.1	ABC transporter permease subunit	E	COG1177	-
Human	group_2387	EHF36_RS08135	WP_134838396.1	LacI family DNA-binding transcriptional regulator	K	COG1609	-
Human	group_2602	EHF36_RS08130	WP_134838395.1	inositol monophosphatase	G	COG0483	-
Human	group_2865	EHF36_RS03680	WP_134838098.1	TonB-dependent receptor	P	COG4773	-
Human	group_2877	EHF36_RS03675	WP_134838097.1	hypothetical protein	Q	COG2931	-
Human	group_2883	EHF36_RS03670	WP_167731831.1	hypothetical protein	Q	COG2931	-
Human	group_2868	EHF36_RS03665	WP_165390042.1	AraC family transcriptional regulator	K	COG2207	-
Human	group_2792	EHF36_RS03660	WP_165390043.1	alpha/beta hydrolase-fold protein	R	COG2819	-
*locus tag ids belong to 186J (sloth) and SWMUKG01 (human) genomes

## Sheet: Table S4
Table S4 Summary of COG annotation of genes listed in table S3
Category	Number	genome
C	1	Sloth
G	2	Sloth
I	2	Sloth
K	3	Sloth
L	5	Sloth
M	2	Sloth
R	1	Sloth
S	2	Sloth
U	1	Sloth
V	11	Sloth
X	7	Sloth
Ambiguous	10	Sloth
Unclassified	28	Sloth
C	1	Human
E	5	Human
G	4	Human
I	6	Human
K	5	Human
M	1	Human
O	2	Human
P	3	Human
Q	4	Human
R	7	Human
T	1	Human
Ambiguous	11	Human
Unclassified	4	Human

## Sheet: Table S5
Table S5 List of regions predicted as phage sequences by virsorter2 and phispy tools in 17 K. gyiorum genomes
Phage Name	strain	tool	contig	start	end	length
3415D_P1	3415D	virsorter2	NZ_JALJYP010000005.1	136833	223431	86598
3415G_P1	3415G	virsorter2	NZ_JAOQOW010000001.1	92833	148821	55988
262I_P1	262I	virsorter2	NZ_JALJYO010000005.1	136833	223431	86598
2780G_P1	2780G	virsorter2	NZ_JALJXY010000005.1	136833	223065	86232
KG0001_P1	KG0001	virsorter2	NZ_JANKLF010000003.1	264103	386357	122254
SWMUKG01_P1	SWMUKG01	virsorter2	NZ_CP033936.1	2292272	2384913	92641
CG1_P1	CG1	virsorter2	NZ_LBNE01000005.1	166633	215440	48807
DSM_16618_P1	DSM_16618	virsorter2	NZ_SGWZ01000004.1	134477	151227	16750
DSM_16618_P2	DSM_16618	virsorter2	NZ_SGWZ01000001.1	379325	395017	15692
3415D_spy_P1	3415D	Phispy	NZ_JALJYP010000005.1	144389	172156	27767
3415G_spy_P1	3415G	Phispy	NZ_JAOQOW010000001.1	84255	112022	27767
262I_spy_P1	262I	Phispy	NZ_JALJYO010000005.1	144389	172156	27767
2780G_spy_P1	2780G	Phispy	NZ_JALJXY010000005.1	144389	174650	30261
KG0001_spy_P1	KG0001	Phispy	NZ_JANKLF010000003.1	268223	320985	52762
SWMUKG01_spy_P1	SWMUKG01	Phispy	NZ_CP033936.1	2293146	2328029	34883
CG1_spy_P1	CG1	Phispy	NZ_LBNE01000001.1	428831	442672	13841
CG1_spy_P2	CG1	Phispy	NZ_LBNE01000005.1	163880	213647	49767
DSM_16618_spy_P1	DSM_16618	Phispy	NZ_SGWZ01000001.1	383970	399861	15891
DSM_16618_spy_P2	DSM_16618	Phispy	NZ_SGWZ01000001.1	950446	968454	18008
DSM_16618_spy_P3	DSM_16618	Phispy	NZ_SGWZ01000002.1	166158	172624	6466
DSM_16618_spy_P4	DSM_16618	Phispy	NZ_SGWZ01000003.1	160253	183605	23352

## Sheet: Table S6
genome	Plasmid replicon			phage sequences					Defense systems
	IncN2	IncQ1	IncQ2	Kgϕ1 (27.7Kb)	Kgϕ2 (15.8Kb)	Kgϕ3 (52.7Kb)	Kgϕ4 (49.7Kb)	Kgϕ5 (34.Kb)	cas2_I-E_2	cas5_I-E_2	cas7_I-E_16	cas1_I-E_1	cas6e_I_II_III_IV_V_VI_3	cse2gr11_I-E_8	cas8e_I-E_2	cas3_I_2	cas5f_I-F_4	cas8f_I-F_8	cas1_I-F_1	cas7f_I-F_2	cas3f_I-F_1	Dynamins__LeoBC	Dynamins__LeoA	dGTPase__Sp_dGTPase	drt3a	drt3b	drt4	RM_Type_IIG__Type_IIG	RM__Type_I_MTases	RM__Type_I_S	RM__Type_I_REases	RM_Type_IV__Type_IV_REases	Gabija__GajB_2	Gabija__GajA	Lamassu-Fam__LmuB_SMC_Cap4_nuclease_II	Lamassu-Fam__LmuC_acc_Cap4_nuclease	Lamassu-Fam__LmuA_effector_Cap4_nuclease_II	AbiEii__AbiEi_1	AbiEii__AbiEii	BREX__brxA_DUF1819	BREX__brxB_DUF1788	BREX__brxC	BREX__pglX1	BREX__pglZA	BREX__brxL	Rst_3HP__Hp3	Rst_3HP__Hp2	Rst_3HP__Hp1	CBASS__Phospholipase
1483E	1	0	1	0	0	0	0	0	1	1	1	1	1	1	1	1	0	0	0	0	0	1	1	1	1	1	1	0	0	0	0	0	0	0	0	0	0	0	0	0	0	0	0	0	0	0	0	0	0
155D	1	0	1	0	0	0	0	0	1	1	1	1	1	1	1	1	0	0	0	0	0	1	1	1	1	1	1	0	0	0	0	0	0	0	0	0	0	0	0	0	0	0	0	0	0	0	0	0	0
186F	1	0	1	0	0	0	0	0	1	1	1	1	1	1	1	1	0	0	0	0	0	0	0	1	0	0	1	0	0	0	0	0	0	0	0	0	0	0	0	0	0	0	0	0	0	0	0	0	0
186J	1	0	1	0	0	0	0	0	1	1	0	1	1	1	1	1	0	0	0	0	0	0	0	1	0	0	1	0	0	0	0	0	0	0	0	0	0	0	0	0	0	0	0	0	0	0	0	0	0
262I	1	0	1	1	0	0	0	0	0	0	0	1	1	1	1	1	0	0	0	0	0	1	1	1	0	0	1	0	0	0	0	0	0	0	0	0	0	0	0	0	0	0	0	0	0	0	0	0	0
2780G	1	0	1	1	0	0	0	0	1	1	0	1	1	1	1	1	0	0	0	0	0	1	1	1	0	0	1	0	0	0	0	0	0	0	0	0	0	0	0	0	0	0	0	0	0	0	0	0	0
3324E	1	0	1	0	0	0	0	0	1	1	1	1	1	1	1	1	0	0	0	0	0	0	0	1	0	0	1	0	0	0	0	0	0	0	0	0	0	0	0	0	0	0	0	0	0	0	0	0	0
3415D	1	0	1	1	0	0	0	0	1	1	0	1	1	1	1	1	0	0	0	0	0	1	1	1	0	0	1	0	0	0	0	0	0	0	0	0	0	0	0	0	0	0	0	0	0	0	0	0	0
3415G	1	0	1	1	0	0	0	0	1	1	0	0	1	1	1	1	0	0	0	0	0	1	1	1	0	0	1	0	0	0	0	0	0	0	0	0	0	0	0	0	0	0	0	0	0	0	0	0	0
381J	1	0	1	0	0	0	0	0	1	1	1	1	1	1	1	1	0	0	0	0	0	1	1	1	1	1	1	0	0	0	0	0	0	0	0	0	0	0	0	0	0	0	0	0	0	0	0	0	0
4201G	1	0	1	0	0	0	0	0	1	1	1	1	1	1	1	1	0	0	0	0	0	0	0	1	0	0	1	0	0	0	0	0	0	0	0	0	0	0	0	0	0	0	0	0	0	0	0	0	0
652G	1	0	1	0	0	0	0	0	1	1	1	1	1	1	1	1	0	0	0	0	0	0	0	1	0	0	1	0	0	0	0	0	0	0	0	0	0	0	0	0	0	0	0	0	0	0	0	0	0
CG1	0	0	0	0	0	0	1	0	0	0	0	0	0	0	0	0	0	0	0	0	0	0	0	1	0	0	0	1	1	1	1	0	1	1	0	0	0	0	0	1	1	1	1	1	1	1	1	1	0
DSM_16618	0	0	0	0	1	0	0	0	0	0	0	0	0	0	0	0	0	0	0	0	0	0	0	1	0	0	0	1	1	1	1	1	1	1	1	1	1	1	1	0	0	0	0	0	0	0	0	0	0
KG0001	0	0	0	0	0	1	0	0	0	0	0	0	0	0	0	0	0	0	0	0	0	1	1	1	0	0	0	1	0	0	0	0	0	0	0	0	0	0	0	0	0	0	0	0	0	0	0	0	1
SWMUKG01	0	1	0	0	0	0	0	1	0	0	0	0	0	0	0	0	1	1	1	1	1	1	1	1	0	0	0	0	0	0	0	0	0	0	0	0	0	0	0	0	0	0	0	0	0	0	0	0	0
[truncated: 14 more columns]

## Sheet: Table S7
Table S7 Antibiogram profile of 12 K. gyiorum isolates from brown-throated sloths
Sample ID	Strain	ANIMAL	Species	AMI	AMC	AMP	CFE	CAZ	CLO	CRO	DOX	ENO	GEN	CIP	IPM	NEO	NOR	SUT
1	1483E	G	Kerstersia gyiorum	24	>30	25	19	26	20	30	29	23	23	26	26	19	14	29
4	155D	A	Kerstersia gyiorum	25	30	>30	24	>30	19	>30	20	27	21	24	30	21	10	>30
7	186F	B	Kerstersia gyiorum	29	30	>30	21	>30	27	>30	30	23	28	>30	>30	24	18	>30
9	186J	B	Kerstersia gyiorum	>30	30	>30	21	>30	26	>30	>30	26	24	>30	>30	21	18	>30
10	262I	C	Kerstersia gyiorum	30	30	>30	24	>30	26	>30	26	27	28	29	>30	23	11	>30
12	2780G	H	Kerstersia gyiorum	30	30	>30	21	>30	26	>30	24	30	28	29	30	23	11	>30
17	3324E	I	Kerstersia gyiorum	30	30	>30	21	>30	22	>30	>30	30	26	>30	>30	24	16	>30
19	3415D	J	Kerstersia gyiorum	30	>30	>30	24	>30	21	>30	30	28	28	26	28	30	13	>30
20	3415G	J	Kerstersia gyiorum	28	>30	>30	21	28	24	>30	29	25	24	23	25	24	14	>30
28	381J	E	Kerstersia gyiorum	30	30	>30	24	>30	24	>30	24	26	24	29	30	20	10	>30
30	4201G	L	Kerstersia gyiorum	29	>30	>30	28	>30	27	>30	18	26	28	>30	>30	24	18	>30
32	652G	F	Kerstersia gyiorum	30	30	>30	24	>30	25	>30	>30	26	28	22	30	21	10	>30
